# Supplementary material
Source: PubMed Central journal article supplement (PMC2736368)
Supplement: NIHMS133295-supplement-1_si_001.pdf [file NIHMS133295-supplement-1_si_001.pdf]

## Access to a Welwitindolinone Core Using Sequential Cycloadditions

Barry M. Trost\*, Patrick J. McDougall

*Department of Chemistry, Stanford University, Stanford, California 94305-5080*

# Supporting Information

## A. Materials and Methods:

All reactions were carried out under an atmosphere of nitrogen or argon in oven-dried glassware with magnetic stirring, unless otherwise indicated. Reaction solvents were dried using J. C. Meyer's Solvent Purification System passing through activated alumina prior to use. All other reagents were purchased from commercial sources and used without further purification, unless otherwise indicated.

Flash Chromatography was performed using SiliCycle SilicaFlash F 60 40-60  $\mu\text{m}$  60 Å silica gel. Analytical thin-layer chromatography was performed with 0.25 mm coated commercial silica gel plates (E. Merck, DC-Glasfolien, Kieselgel 60 F254) and visualized with UV light and potassium permanganate stain. Melting points were obtained on a Thomas-Hoover apparatus in open capillary tubes and are uncorrected. Proton nuclear magnetic resonance ( $^1\text{H-NMR}$ ) data were acquired on a Mercury 400 (400 MHz), a Varian 400 (400 MHz), or on a Varian Unity Inova-500 (500 MHz) spectrometer. Carbon-13 nuclear magnetic resonance ( $^{13}\text{C-NMR}$ ) data were acquired at 100 MHz on a Mercury 400 or at 125 MHz on a Varian Unity Inova 500 spectrometer. Chemical shifts are reported in delta ( $\delta$ ) units, part per million (ppm) relative to deuteriochloroform (7.26 ppm for  $^1\text{H}$  NMR and 77.23 ppm for  $^{13}\text{C}$ ). Chiral HPLC analyses were performed on a Thermo Separation Products Spectra Series P-100 or P-200 and UV100 (254 nm or 220 nm) using Chiralcel columns (OB-H, OC, OD-H, OJ-H), or Chiralpak column (AD, AS, IA, IB, IC) eluting with the solvent mixtures indicated. Optical rotations were measured on a Jasco DIP-1000 digital polarimeter using 5 cm cells and the sodium D line (589 nm) at ambient temperature in dichloromethane. Infrared (IR) data were recorded as films on potassium bromide (KBr) pellets on a Thermo Scientific Nicolet IR 100 FT-IR spectrometer. High resolution mass spectra were obtained from Stanford University on a Micromass Q-ToF API US Mass Spectrometer using positive electrospray ionization (+ESI). Elemental analysis were conducted by M-H-W Laboratories, Phoenix, Az.

## B. Procedures and Analytical Data

### 1. Preparation of the Tropone Intermediates

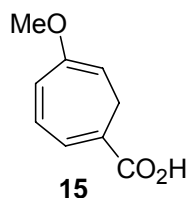

#### Carboxylic Acid **15**

A solution of cycloheptatriene **14**<sup>1</sup> (5.30 g, 27.3 mmole) and barium hydroxide (5.20 g, 16.4 mmole) in 65 mL methanol was heated to reflux temperature for 3 h. The reaction mixture was cooled, diluted with CH<sub>2</sub>Cl<sub>2</sub> and acidified with saturated NaHSO<sub>4</sub>. The organic layer was separated and the aqueous layer extracted twice with CH<sub>2</sub>Cl<sub>2</sub>. The combined organic fractions were dried over Na<sub>2</sub>SO<sub>4</sub>, filtered and concentrated under reduced pressure to give 4.02 g (89%) of the acid **15**. This material was used without further purification. m.p. = 144 °C, R<sub>f</sub> = 0.4 (50% EtOAc/PE), <sup>1</sup>H NMR (400 MHz, CDCl<sub>3</sub>) δ 6.82 (d, *J* = 12.0 Hz, 1H), 6.61 (dd, *J* = 11.6, 6.8 Hz, 1H), 6.49 (dd, *J* = 7.6, 7.6 Hz, 1H), 5.41 (d, *J* = 6.4 Hz), 3.61 (s, 3H), 2.62 (d, *J* = 7.6 Hz, 2H); <sup>13</sup>C NMR (100 MHz, CDCl<sub>3</sub>) δ 173.0, 151.4, 130.7, 130.6, 128.1, 121.4, 97.8, 56.4, 32.9; IR (film) 2968, 2836, 2658, 2534, 1684, 1622, 1605, 1537, 1449, 1412, 1359, 1282, 1264, 1197, 1167 cm<sup>-1</sup>; Anal. calc'd for C<sub>9</sub>H<sub>10</sub>O<sub>3</sub>: C, 65.05, H, 6.07. Found: C, 64.94, H, 5.96.

#### a. Attempted Preparation of Tropone **19**

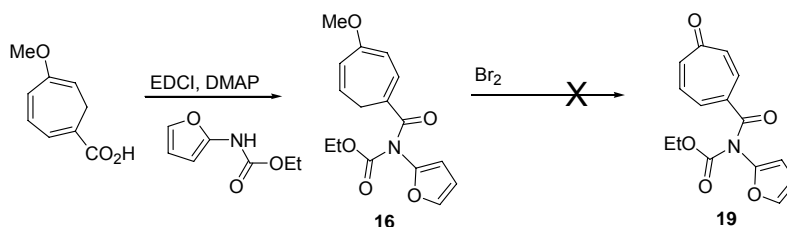

To a mixture of carboxylic acid **15** (0.299 g, 1.38 mmole), 1-ethyl-3-(3'-dimethylaminopropyl)carbodiimide hydrochloride (0.302 g, 1.58 mmole), ethyl-2-furylcarbamate<sup>2</sup>, and a catalytic amount of 4-dimethylaminopyridine was added 5 ml CH<sub>2</sub>Cl<sub>2</sub>. The resulting solution was stirred for 5 h at room temperature. The solvents were evaporated and the residue was purified by flash chromatography to give 0.209 g (50%) of the desired coupled product **16**. R<sub>f</sub> = 0.15 (10% EtOAc/PE). <sup>1</sup>H NMR (400 MHz, CDCl<sub>3</sub>) δ 7.28 (dd, *J* = 2.0, 1.0 Hz, 1H), 6.52-

6.51 (band, 2H), 6.34 (dd,  $J = 3.2, 2.4$  Hz, 1H), 6.09 (dd,  $J = 3.2, 1.2$  Hz, 1H), 5.86 (dd,  $J = 7.6, 7.6$  Hz, 1H), 5.33 (dd,  $J = 3.2, 1.2$  Hz, 1H), 4.20 (ddd,  $J = 7.1, 7.1, 7.1$  Hz, 2H), 3.57 (s, 3H), 2.54 (d,  $J = 7.6$  Hz, 2H), 1.21 (dd,  $J = 7.2, 7.2$  Hz, 3H);  $^{13}\text{C}$  NMR (100 MHz,  $\text{CDCl}_3$ )  $\delta$  170.7, 153.3, 151.6, 143.8, 140.7, 136.1, 130.8, 122.7, 121.2, 111.5, 106.3, 97.5, 63.7, 56.4, 32.7, 14.1; IR (film) 2980, 2937, 1750, 1706, 1619, 1530, 1500, 1370, 1332, 1297, 1262, 1233, 1197, 1158  $\text{cm}^{-1}$ .

### Oxidation to Tropone **19**

Oxidation of cycloheptatriene **16** as described in the subsequent tropone synthesis using molecular bromine was unsuccessful in delivering tropone **19**.

### b. Preparation of Tropone **20**

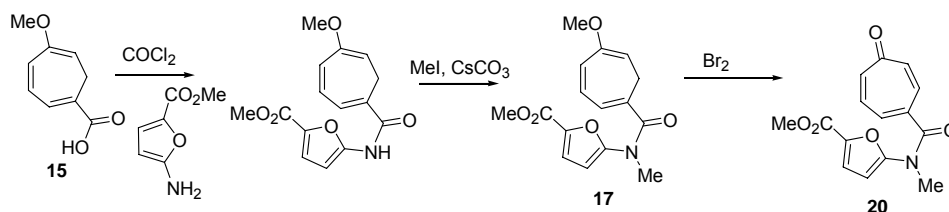

### Amide Coupling

To a solution of carboxylic acid **15** (0.698 g, 4.20 mmole) in 30 mL  $\text{CH}_2\text{Cl}_2$  under a nitrogen atmosphere was added oxalyl chloride (0.730 mL, 8.40 mmole). The resulting reaction mixture was stirred at room temperature for 4 h. After this time, the solvents were evaporated and the residue was redissolved in 5 mL  $\text{CH}_2\text{Cl}_2$ . Pyridine (0.453 mL, 5.60 mmole) was added, followed by the addition of 5-amino-2-furancarboxylic acid methyl ester<sup>3</sup> (0.395 g, 2.80 mmole). The reaction mixture was stirred for 1 h and quenched by the addition of saturated  $\text{NaHCO}_3$ . The organic layer was separated and the aqueous fraction extracted twice with  $\text{CH}_2\text{Cl}_2$ . The combined fractions were dried over  $\text{Na}_2\text{SO}_4$ , filtered and concentrated. Purification by flash chromatography (30-40%  $\text{EtOAc/PE}$ ) gave 0.710 g (88%) of the desired product as a 5:1 mixture of double bond isomers as a clear oil. Analysis of major isomer:  $R_f = 0.35$  (35%  $\text{EtOAc/PE}$ );  $^1\text{H}$  NMR (400 MHz,  $\text{CDCl}_3$ )  $\delta$  8.45 (s, 1H), 7.56 (d,  $J = 7.4$  Hz, 1H), 7.16 (d,  $J = 3.8$  Hz, 1H), 6.57 (d,  $J = 3.7$  Hz, 1H), 6.50 (d,  $J = 9.5$  Hz, 1H), 5.53 (d,  $J = 7.3$  Hz, 1H), 5.45 (ddd,  $J = 9.4, 7.3, 7.3$  Hz, 1H), 3.82 (s, 3H), 3.65 (s, 3H), 2.51 (d,  $J = 7.2$  Hz, 2H);  $^{13}\text{C}$  NMR (100 MHz,  $\text{CDCl}_3$ )  $\delta$  164.3, 159.2, 157.3, 150.2, 136.4, 135.3, 127.7, 124.0, 121.5, 119.9, 97.3, 96.5, 57.0, 52.0, 33.4; IR (film) 3281, 1715, 1676, 1606, 1525, 1437, 1313, 1254, 1206, 1135  $\text{cm}^{-1}$ .

### Cycloheptatriene imide **17**

A mixture of the secondary amide prepared above (0.710 g, 2.45 mmole) and  $\text{CsCO}_3$  (1.20 g, 3.68 mmole) was dissolved in 4 mL DMF and 1 mL THF.

Iodomethane (0.457 mL, 7.35 mmole) was added and the mixture was stirred for 4 h at room temperature. The reaction was diluted with water and ether. The organic layer was separated and the aqueous fraction extracted twice with ether. The combined fractions were washed with brine, dried over MgSO<sub>4</sub>, filtered and concentrated under reduced pressure. Purification by flash chromatography (30-40% EtOAc/PE) gave 0.642 g (86%) of the desired product **17** as an off-white solid. R<sub>f</sub> = 0.35 (35% EtOAc/PE); m.p = 88-90 °C (decomp); <sup>1</sup>H NMR (400 MHz, CDCl<sub>3</sub>) δ 6.98 (d, *J* = 3.6 Hz, 1H), 6.97 (d, *J* = 7.2 Hz, 1H), 6.12 (d, *J* = 9.3 Hz, 1H), 5.91 (d, *J* = 3.6 Hz, 1H), 5.32 (d, *J* = 7.2 Hz, 1H), 5.06 (ddd, *J* = 9.3, 7.1, 7.1 Hz, 1H), 3.80 (s, 3H), 3.54 (s, 3H), 3.28 (s, 3H), 2.29 (d, *J* = 7.1 Hz, 2H); <sup>13</sup>C NMR (100 MHz, CDCl<sub>3</sub>) δ 171.1, 158.8, 155.0, 153.7, 139.7, 133.4, 130.1, 125.7, 119.7, 116.6, 104.2, 96.3, 56.6, 51.9, 36.4, 32.6; IR (film) 2951, 1727, 1665, 1606, 1532, 1435, 1373, 1308, 1263, 1212, 1161, 1137, 1019 cm<sup>-1</sup>.

### Oxidation to Tropone **20**

To a solution of the *N*-methylamide prepared above (0.642 g, 2.12 mmole) in 20 ml CH<sub>2</sub>Cl<sub>2</sub> was added a solution of bromine (0.108 mL, 2.12 mmole) in 2 mL CH<sub>2</sub>Cl<sub>2</sub>. The resulting reaction mixture was immediately quenched with equal portions of saturated NaHCO<sub>3</sub> and saturated Na<sub>2</sub>S<sub>2</sub>O<sub>3</sub>. The organic layer was separated and the aqueous fraction extracted twice with CH<sub>2</sub>Cl<sub>2</sub>. The combined fractions were dried over Na<sub>2</sub>SO<sub>4</sub>, filtered and concentrated under reduced pressure. Purification by flash chromatography (70-80% EtOAc/PE) gave 0.441 g (72%) of the desired tropone **20** as a clear oil. R<sub>f</sub> = 0.15 (50% EtOAc/PE); <sup>1</sup>H NMR (400 MHz, CDCl<sub>3</sub>) δ 7.03-6.81 (band, 6H), 5.92 (bs, 1H), 3.81 (s, 3H), 3.36 (s, 3H); <sup>13</sup>C NMR (100 MHz, CDCl<sub>3</sub>) δ 187.1, 169.2, 158.4, 151.4, 143.8, 141.5, 134.7, 134.3, 133.9, 119.4, 52.2, 36.2; IR (film) 3127, 2952, 1728, 1673, 1634, 1586, 1537, 1436, 1380, 1309, 1214, 1140 cm<sup>-1</sup>; Anal. calc'd for C<sub>15</sub>H<sub>13</sub>NO<sub>5</sub>: C, 62.72, H, 4.56, N, 4.88. Found: C, 62.61, N, 4.65, H, 5.00.

### c. Preparation of Tropone **21**

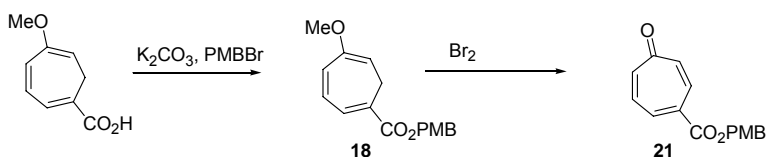

### Esterification to cycloheptatriene **18**

To a solution of the carboxylic acid **15** (1.0 g, 6.02 mmole) in 30 mL DMF was added K<sub>2</sub>CO<sub>3</sub> (1.0 g, 7.22 mmole). The reaction mixture was cooled to 0 °C. Freshly prepared 4-methoxybenzyl bromide was added to the reaction mixture and the solution was stirred for 4 h at 0 °C. The reaction mixture was then diluted with water and ether. The organic layer was separated and the aqueous layer extracted twice with ether. The combined organic fractions were dried over

MgSO<sub>4</sub>, filtered, and concentrated under reduced pressure. Purification by flash chromatography (7-10% EtOAc/PE) gave 1.52 g (88%) of the PMB ester **18** as a clear oil. R<sub>f</sub> = 0.25 (10% EtOAc/PE). <sup>1</sup>H NMR (400 MHz, CDCl<sub>3</sub>) δ 7.34-7.32 (band, 2H), 6.91-6.88 (band, 2H), 6.83 (dd, *J* = 11.2, 0.8 Hz, 1H), 6.58 (dd, *J* = 11.2, 6.4 Hz, 1H), 6.39 (ddd, *J* = 7.6, 7.6, 0.8 Hz, 1H), 5.38 (d, *J* = 6.8 Hz, 1H), 5.15 (s, 2H), 3.81 (s, 3H), 3.60 (s, 3H), 2.59 (d, *J* = 7.6 Hz, 2H); <sup>13</sup>C NMR (100 MHz, CDCl<sub>3</sub>) δ 166.9, 159.7, 151.6, 131.3, 130.4, 130.1, 128.4, 126.4, 121.8, 114.0, 97.5, 66.4, 56.4, 55.4, 32.8; IR (film) 2958, 2835, 1715, 1615, 1515, 1462, 1360, 1320, 1245, 1165, 1035 cm<sup>-1</sup>; Anal. calc'd for C<sub>17</sub>H<sub>18</sub>O<sub>4</sub>: C, 71.31, H, 6.34. Found: C, 71.23, H, 6.21.

### Oxidation to Tropone **21**

To a solution of triene **18** prepared above (5.83 g, 19.7 mmole) in 150 mL CH<sub>2</sub>Cl<sub>2</sub> held at 0 °C was added bromine (1.01 mL, 19.7 mmole) in 20 mL CH<sub>2</sub>Cl<sub>2</sub> dropwise over 10 min. The reaction mixture was immediately quenched with sat NaHCO<sub>3</sub> and sat Na<sub>2</sub>S<sub>2</sub>O<sub>3</sub>. The organic layer was separated and the aqueous layer extracted twice with CH<sub>2</sub>Cl<sub>2</sub>. The combined organic fractions were dried over Na<sub>2</sub>SO<sub>4</sub>, filtered, and concentrated under reduced pressure. Purification by flash chromatography (45-55% EtOAc/PE) gave 3.53 g (66%) of the desired tropone **21** as a brown solid. R<sub>f</sub> = 0.55 (50% EtOAc/PE); m.p. = 52 °C; <sup>1</sup>H NMR (400 MHz, CDCl<sub>3</sub>) δ 7.88 (d, *J* = 8.4 Hz, 1H), 7.75 (ddd, *J* = 12.8, 1.6, 0.4 Hz, 1H), 7.34-7.31 (band, 2H), 7.14 (ddd, *J* = 12.0, 8.4, 0.4 Hz, 1H), 7.07 (ddd, *J* = 11.6, 2.4, 1.2 Hz, 1H), 6.99 (dd, *J* = 12.4, 2.8 Hz, 1H), 6.90-6.86 (band, 2H), 5.23 (s, 2H), 3.77 (s, 3H); <sup>13</sup>C NMR (100 MHz, CDCl<sub>3</sub>) δ 187.3, 165.6, 160.0, 145.4, 141.1, 137.9, 135.5, 134.5, 134.2, 130.4, 127.2, 114.1, 67.9, 55.3; IR (film) 2938, 2837, 1717, 1636, 1589, 1515, 1455, 1374, 1262, 1214, 1176, 1081, 1030 cm<sup>-1</sup>.

## 2. Enantioselective [6 + 3] Cycloadditions

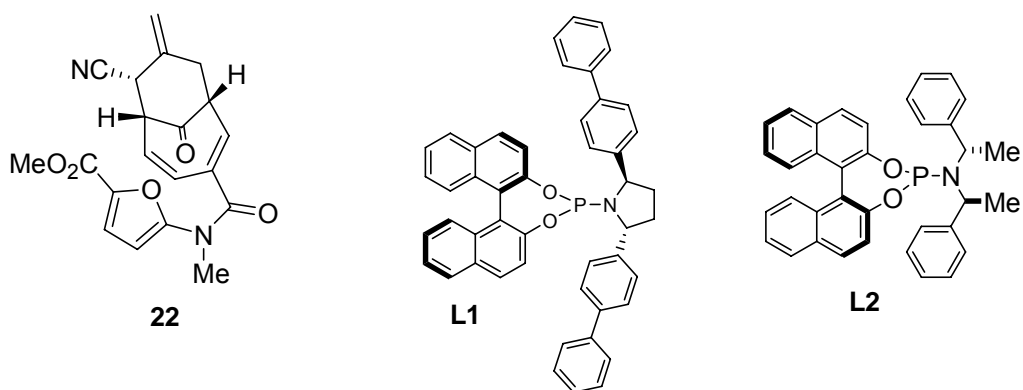



single diastereomer of the desired adduct as an amorphous solid.  $R_f = 0.25$  (40% EtOAc/PE);  $^1\text{H NMR}$  (400 MHz,  $\text{CDCl}_3$ )  $\delta$  7.33-7.29 (band, 2H), 6.92-6.88 (band, 2H), 6.78 (d,  $J = 8.5$  Hz, 1H), 6.72 (d,  $J = 12.3$  Hz, 1H), 5.75 (dd,  $J = 12.3, 7.9$  Hz, 1H), 5.50 (s, 1H), 5.24 (s, 1H), 5.14 (AB, 2H,  $J_{AB} = 12.1$  Hz,  $\Delta\nu_{AB} = 14.3$  Hz), 3.81 (s, 3H), 3.83-3.80 (m, 1H), 3.69 (m, 1H), 3.56 (m, 1H), 2.73 (dd,  $J = 14.5, 6.3$  Hz, 1H), 2.65 (dd,  $J = 14.5, 1.7$  Hz, 1H);  $^{13}\text{C NMR}$  (100 MHz,  $\text{CDCl}_3$ )  $\delta$  202.5, 166.0, 159.8, 135.7, 132.9, 130.3, 129.2, 127.6, 126.4, 122.9, 119.6, 115.9, 114.0, 67.3, 55.3, 54.0, 52.7, 40.6, 39.1; IR (film) 2856, 2838, 2246, 1714, 1613, 1515, 1462, 1375, 1304, 1238, 1176, 1091, 1042  $\text{cm}^{-1}$ ; MS (HRMS) for  $\text{C}_{21}\text{H}_{19}\text{NO}_4$  calc.  $[\text{M} + \text{Na}]$  372.1212, found 372.1210.

With Ligand **L1**; Procedure as above using tropone **21** (0.062 g, 0.229 mmole),  $\text{Pd}(\text{dba})_2$  (0.0079 g, 0.0138 mmole), ligand **L1** (0.016 g, 0.0275 mmole), and TMM donor **13** (0.077 mL, 0.330 mmole) held at 0-4 °C for 15 h to give 0.064 g (80%) of desired product as a single diastereomer. ee was determined after next step due to difficulties in chiral resolution.  $[\alpha]_D^{23} = +86$  (c 0.7,  $\text{CH}_2\text{Cl}_2$ , 94% ee).

### 3. Completion of Core Structure From Adduct **22**

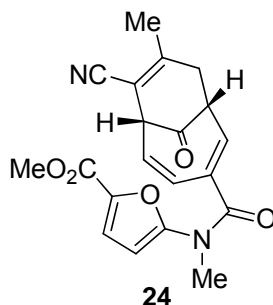

#### $\alpha, \beta$ -Unsaturated Nitrile **24**

A mixture of the TMM adduct **22** (0.266 g, 0.726 mmole) and 4-dimethylamino pyridine (0.018 g, 0.145 mmole) was dissolved in dichloroethane (3.5 mL). The solution was heated to 50 °C for 15 h and purified directly using flash chromatography (60-70% EtOAc/PE) to give 0.244 g (92%) of the desired compound as a clear oil.  $R_f = 0.25$  (60% EtOAc/PE);  $^1\text{H NMR}$  (400 MHz,  $\text{CDCl}_3$ )  $\delta$  7.15 (d,  $J = 3.5$  Hz, 1H), 6.12 (d,  $J = 10.7$  Hz, 1H), 5.98 (bs, 1H), 5.85 (dd,  $J = 10.0, 10.0$  Hz, 1H), 5.79 (d,  $J = 5.4$  Hz, 1H), 3.89 (s, 3H), 3.69 (d,  $J = 9.0$  Hz, 1H), 3.44 (dd,  $J = 5.6, 5.6$  Hz, 1H), 3.31 (s, 3H), 2.87 (dd,  $J = 18.7, 5.8$  Hz, 1H), 2.43 (d,  $J = 18.8$  Hz, 1H), 2.00 (s, 3H);  $^{13}\text{C NMR}$  (100 MHz,  $\text{CDCl}_3$ )  $\delta$  199.1, 169.8, 158.7, 151.9, 151.2, 140.8, 133.6, 131.8, 127.4, 123.3, 119.9, 116.3, 105.9, 52.3, 50.5, 50.3, 40.1, 36.2, 22.2; IR (film) 3131, 2951, 2214, 1731, 1671, 1606, 1536, 1435, 1379, 1308, 1212, 1138, 1018  $\text{cm}^{-1}$ ; MS (HRMS) for  $\text{C}_{20}\text{H}_{18}\text{N}_2\text{O}_5$  calc.  $[\text{M} + \text{Na}]$  389.1114, found 389.1109.

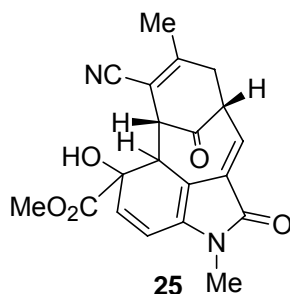

### Diels Alder adduct **25**

A solution of the amidofuran **24** (0.302 g, 0.824 mmole) in toluene (5 mL) was heated in a microwave reactor at 150 °C for 6 h. The reaction mixture was purified directly using flash chromatography (70-90% EtOAc/PE) to give 0.081 g of recovered starting material and 0.127 g (42%, 57% brsm) of the desired alcohol as an unstable yellow solid.  $R_f = 0.20$  (75% EtOAc/PE);  $^1\text{H NMR}$  (400 MHz,  $\text{C}_6\text{D}_6$ )  $\delta$  6.31 (d,  $J = 7.3$  Hz, 1H), 5.79 (d,  $J = 9.9$  Hz, 1H), 5.51 (d,  $J = 9.9$  Hz, 1H), 3.79 (s, 1H), 3.72 (s, 3H), 3.64 (bs, 1H), 3.24 (bs, 1H), 2.94 (dd,  $J = 7.5, 7.5$  Hz, 1H), 2.40 (s, 3H), 1.64 (dd,  $J = 19.1, 7.4$  Hz, 1H), 1.45 (d,  $J = 19.1$  Hz, 1H), 1.35 (s, 3H).

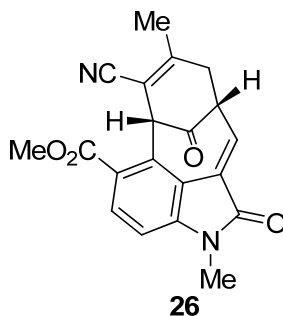

### Oxindole **26**

A mixture of the alcohol **25** (0.036 g, 0.098 mmole) and Burgess reagent<sup>6</sup> (0.035 g, 0.147 mmole) was dissolved in toluene (1 mL). The solution was heated to 50 °C for 15 h and purified directly using flash chromatography (70% EtOAc/PE) to give 0.020 g (59%) of the desired oxindole as a yellow solid.  $R_f = 0.30$  (60% EtOAc/PE); m.p. > 230 °C;  $^1\text{H NMR}$  (400 MHz,  $\text{CDCl}_3$ )  $\delta$  8.16 (d,  $J = 8.4$  Hz, 1H), 6.89 (d,  $J = 6.6$  Hz, 1H), 6.83 (d,  $J = 8.4$  Hz, 1H), 6.12 (bs, 1H), 3.93 (s, 3H), 3.75 (dd,  $J = 6.6, 6.6$  Hz, 1H), 3.26 (s, 3H), 3.09 (dd,  $J = 19.0, 6.8$  Hz, 1H), 2.77 (d,  $J = 18.6$  Hz, 1H), 2.10 (s, 3H);  $^{13}\text{C NMR}$  (100 MHz,  $\text{CDCl}_3$ )  $\delta$  202.7, 166.8, 166.7, 150.3, 147.1, 135.4, 133.9, 131.3, 129.1, 124.6, 122.5, 120.5, 109.3, 107.9, 52.6, 50.0, 49.4, 38.2, 26.6, 22.8; IR (film) 2952, 2210, 1710, 1599, 1478, 1267, 1150, 1130  $\text{cm}^{-1}$ ; MS (HRMS) for  $\text{C}_{20}\text{H}_{16}\text{N}_2\text{O}_4$  calc.  $[\text{M} + \text{Na}]$  371.1008, found 371.1010.



## 4. Completion of Core Structure From Adduct 23

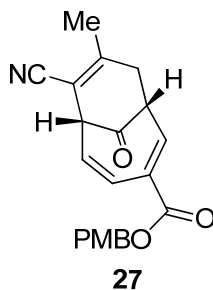

### $\alpha$ , $\beta$ -Unsaturated Nitrile **27**

A mixture of the TMM adduct **23** (2.0 g, 5.73 mmole) and 4-dimethylamino pyridine (0.140 g, 1.15 mmole) was dissolved in dichloroethane (5 mL). The solution was heated to 50 °C for 15 h and purified directly using flash chromatography (40-50% EtOAc/PE) to give 2.0 g (quant.) of the desired compound as a clear oil. Chiral HPLC using IC column, 40% isopropanol/heptane, 0.8 mL/min, 254 nm, 24 (minor) and 45 (major) minutes gave an enantiomeric excess of -37% using ligand **L2** and 94% with ligand **L1**.  $R_f$  = 0.25 (40% EtOAc/PE);  $^1\text{H}$  NMR (400 MHz,  $\text{CDCl}_3$ )  $\delta$  7.34-7.31 (band, 2H), 6.93-6.89 (band, 2H), 6.78 (d,  $J$  = 11.2 Hz, 1H), 6.70 (d,  $J$  = 5.7 Hz, 1H), 6.01 (dd,  $J$  = 11.0, 9.6 Hz, 1H), 5.16 (AB, 2H,  $J_{AB}$  = 12.0 Hz,  $\Delta\nu_{AB}$  = 7.6 Hz), 3.82 (s, 3H), 3.79 (bs, 1H), 3.54 (m, 1H), 2.97 (dd,  $J$  = 18.4, 5.8 Hz, 1H), 2.64 (d,  $J$  = 18.3 Hz, 1H), 2.08 (s, 3H);  $^{13}\text{C}$  NMR (100 MHz,  $\text{CDCl}_3$ )  $\delta$  199.8, 165.8, 159.9, 151.0, 137.6, 130.5, 128.6, 127.5, 127.0, 123.8, 116.4, 114.1, 106.5, 67.5, 55.4, 50.7, 50.3, 39.8, 22.2; IR (film) 2957, 2213, 1715, 1612, 1515, 1442, 1377, 1319, 1241, 1175, 1110, 1031  $\text{cm}^{-1}$ .  $[\alpha]_D^{23} = -171.7$  (c 0.8,  $\text{CH}_2\text{Cl}_2$ , >96% ee).

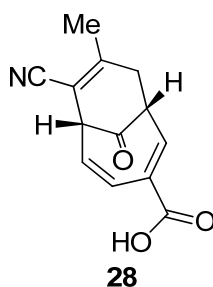

### Carboxylic Acid **28**

To a solution of the PMB ester **27** (2.09 g, 5.30 mmole) in 14 mL  $\text{CH}_2\text{Cl}_2$  under an argon atmosphere was added trifluoroacetic acid (1.18 mL, 15.9 mmole). The reaction mixture was stirred at room temperature for 15 h. The solution was slowly quenched using saturated  $\text{NaHCO}_3$ . The organic layer was separated and discarded. The aqueous layer was acidified using solid  $\text{NaHSO}_4$  and extracted

twice with  $\text{CH}_2\text{Cl}_2$ . The combined organic fractions were dried over  $\text{Na}_2\text{SO}_4$ , filtered, and evaporated to give 1.24 g (quant.) of the desired acid as a white solid.  $R_f = 0.10$  (50% EtOAc/PE); M.P. = 170-172°C (decomp);  $^1\text{H NMR}$  (400 MHz,  $\text{CDCl}_3$ )  $\delta$  6.84 (d,  $J = 5.5$  Hz, 1H), 6.77 (d,  $J = 11.2$  Hz, 1H), 6.07 (dd,  $J = 10.8, 10.8$  Hz, 1H), 5.29 (s, 1H), 3.84 (d,  $J = 10.8$  Hz, 1H), 3.60 (dd,  $J = 5.6, 5.6$  Hz, 1H), 3.02 (dd,  $J = 18.6, 5.6$  Hz, 1H), 2.68 (d,  $J = 18.6$  Hz, 1H), 2.10 (s, 3H);  $^{13}\text{C NMR}$  (100 MHz,  $\text{CDCl}_3$ )  $\delta$  199.6, 171.2, 151.1, 139.7, 128.0, 126.5, 124.4, 116.3, 106.6, 50.7, 50.5, 39.9, 22.2; IR (film) 3063 (br), 2216, 1721, 1428, 1270, 1230, 1108  $\text{cm}^{-1}$ ;  $[\alpha]_D^{23} = -271.7$  (c 0.8,  $\text{CH}_2\text{Cl}_2$ , 94% ee); MS (HRMS) for  $\text{C}_{13}\text{H}_{10}\text{NNaO}_3$  calc.  $[M + \text{Na}]$  274.0456, found 274.0455.

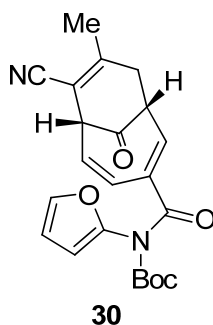

### Imidofuran **30**

To a solution of the carboxylic acid **28** (0.861 g, 3.76 mmole) in 10 mL THF under an argon atmosphere was added triethylamine (0.576 mL, 4.13 mmole). The reaction mixture was cooled to 0 °C and isobutylchloroformate (0.536 mL, 4.13 mmole) was added dropwise. After stirring for 30 min at 0 °C, the solution was cooled to -78 °C. In a separated flask under an argon atmosphere was placed furan-2-ylcarbamic acid *tert*-butyl ester **29**<sup>7</sup> (0.895 g, 4.89 mmole) and 10 mL THF. The solution was cooled to -78 °C and *n*BuLi (2.22 mL, 4.89 mmole, 2.2 M in hexanes) was added slowly. After stirring for 20 min the solution was transferred via cannula to the anhydride. The resulting mixture was stirred for 30 min at -78 °C and quenched with saturated  $\text{NaHCO}_3$ . After warming to room temperature, the organic layer was separated and the aqueous solution extracted twice with  $\text{Et}_2\text{O}$ . The combined organic fractions were dried over  $\text{Na}_2\text{SO}_4$ , filtered, and evaporated. Purification by flash chromatography (30-40% EtOAc/PE) gave 1.02 g (64%) of the desired imide **30** as a clear oil. Acidification of the aqueous layer followed by extraction with  $\text{CH}_2\text{Cl}_2$  allowed for the recovery of 0.169 g starting acid (86% b.r.s.m).  $R_f = 0.55$  (50% EtOAc/PE);  $^1\text{H NMR}$  (400 MHz,  $\text{CDCl}_3$ )  $\delta$  7.32 (m, 1H), 6.42 (m, 1H), 6.31 (d,  $J = 10.9$ , 1H), 6.12 (dd,  $J = 3.3, <1.0$  Hz, 1H), 6.05 (d,  $J = 5.7$  Hz, 1H), 5.97 (dd,  $J = 10.8, 9.6$  Hz, 1H), 3.75 (dd,  $J = 9.6, 2.0$  Hz, 1H), 3.51 (dd,  $J = 5.8, 5.8$  Hz, 1H), 2.94 (dd,  $J = 18.6, 6.0$  Hz, 1H), 2.55 (d,  $J = 18.5$  Hz, 1H), 2.06 (s, 3H), 1.43 (s, 9H).  $^{13}\text{C NMR}$  (100 MHz,  $\text{CDCl}_3$ )  $\delta$  199.6, 170.4, 151.1, 150.8, 143.5, 140.9, 134.2, 133.2, 127.0, 123.9, 116.5, 111.9, 106.5, 84.8, 50.5, 40.1, 27.9, 22.3; IR (film) 2982, 2213, 1736,

1705, 1607, 1500, 1432, 1370, 1341, 1254, 1149, 1113, 1072, 1007  $\text{cm}^{-1}$ ;  $[\alpha]_{\text{D}}^{23} = -216.5$  (c 1.3,  $\text{CH}_2\text{Cl}_2$ , 94% ee); MS (HRMS) for  $\text{C}_{22}\text{H}_{22}\text{N}_2\text{O}_5$  calc.  $[\text{M} + \text{Na}]$  417.1426, found 417.1432.

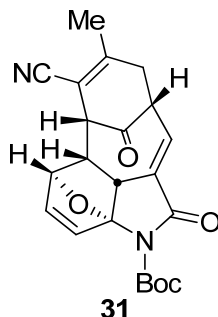

### Diels-Alder adduct **31**

A solution of the imide **30** (0.0300 g, 0.0761 mmole) in 1.5 mL toluene was placed in a round bottom flask equipped with a reflux condenser. The reaction mixture was heated to 115 °C for 4 h. After cooling, the solution was directly purified by flash chromatography (1-2% MeOH/ $\text{CH}_2\text{Cl}_2$ ) to give 0.0298 g (99%) of the intermediate Diels-Alder adduct **31** as a slightly yellow solid.  $R_f = 0.30$  (50% EtOAc/PE); m.p. = >220 °C;  $^1\text{H}$  NMR (400 MHz,  $\text{CDCl}_3$ )  $\delta$  6.60 (d,  $J = 5.7$  Hz, 1H), 6.55 (dd,  $J = 3.4, 3.4$  Hz, 1H), 6.41 (dd,  $J = 5.8, 2.2$  Hz, 1H), 5.70 (d,  $J = 2.2$  Hz, 1H), 3.55 (m, 1H), 3.44 (m, 1H), 2.83 (ddd,  $J = 18.7, <1.0, <1.0$  Hz, 1H), 2.75 (ddd,  $J = 8.4, 3.3, 3.3$  Hz, 1H), 2.63 (d,  $J = 18.6$  Hz, 1H), 2.46 (dd,  $J = 8.4, 7.0$  Hz, 1H), 2.07 (s, 3H), 1.51 (s, 9H);  $^{13}\text{C}$  NMR (100 MHz,  $\text{CDCl}_3$ )  $\delta$  205.1, 166.4, 152.6, 149.1, 135.6, 134.3, 133.4, 131.8, 117.9, 107.1, 99.3, 84.6, 78.0, 49.3, 48.6, 44.3, 43.9, 38.3, 28.1, 23.3; IR (film) 2981, 2209, 1786, 1731, 1682, 1356, 1305, 1258, 1156, 1074  $\text{cm}^{-1}$ .  $[\alpha]_{\text{D}}^{23} = -70.8$  (c 1.2,  $\text{CH}_2\text{Cl}_2$ , 94% ee); MS (HRMS) for  $\text{C}_{22}\text{H}_{22}\text{N}_2\text{O}_5$  calc.  $[\text{M} + \text{Na}]$  417.1426, found 417.1413.

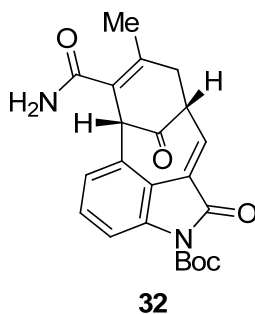

### Oxindole **32**

To a solution of the Diels-Alder adduct **31** (0.003 g, 0.007 mmole) and 0.3 mL  $\text{CH}_2\text{Cl}_2$  at 0 °C was added ~0.010 mL anhydrous trifluoroacetic acid. The reaction

was monitored by TLC while allowing to warm to r.t. Upon consumption of the starting material, the mixture was quenched with saturated  $\text{NaHCO}_3$  and extracted three times with  $\text{CH}_2\text{Cl}_2$ . The combined organic fractions were dried over  $\text{Na}_2\text{SO}_4$ , filtered and concentrated under reduced pressure. Purification by flash chromatography (70-80% EtOAc/PE) gave ~ 0.001g of the *N*-Boc oxindole **32** as a yellow oil.  $R_f = 0.30$  (75% EtOAc/PE);  $^1\text{H NMR}$  (400 MHz,  $\text{CDCl}_3$ )  $\delta$  7.75 (d,  $J = 8.2$  Hz, 1H), 7.32 (dd,  $J = 8.0, 8.0$  Hz, 1H), 7.06 (d,  $J = 7.7$  Hz, 1H), 6.88 (d,  $J = 6.7$  Hz, 1H), 5.31 (bs, 1H), 4.97 (bs, 1H), 4.57 (s, 1H), 3.73 (dd,  $J = 6.6, 6.6$  Hz, 1H), 3.02 (dd,  $J = 17.9, 6.3$  Hz, 1H), 2.66 (d,  $J = 18.0$  Hz, 1H), 1.90 (s, 3H), 1.63 (s, 9H).

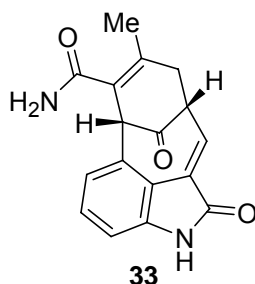

### Oxindole **33**

A small amount of *N*-H oxindole **33** was isolated from the above reaction.  $R_f = 0.1$  (75% EtOAc/PE);  $^1\text{H NMR}$  (400 MHz,  $\text{CD}_3\text{CN}$ )  $\delta$  8.57 (bs, 1H), 7.21 (dd,  $J = 7.8, 7.8$  Hz, 1H), 6.79 (d,  $J = 7.8$  Hz, 1H), 6.78 (d,  $J = 7.8$  Hz, 1H), 6.74 (d,  $J = 6.6$  Hz, 1H), 5.96 (bs, 1H), 5.69 (bs, 1H), 4.32 (d,  $J = 1.9$  Hz, 1H), 3.66 (ddd,  $J = 6.9, 6.9, 1.3$  Hz, 1H), 2.99 (dd,  $J = 18.1, 6.8$  Hz, 1H), 2.68 (d,  $J = 18.1$  Hz, 1H), 1.81 (s, 3H).

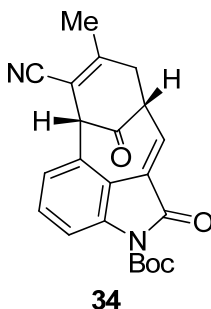

### Oxindole **34**

A solution of the Diels-Alder adduct **31** (0.066 g, 0.167 mmole) and Burgess reagent<sup>6</sup> (0.142 g, 0.502 mmole) in 2 mL toluene was heated to 90 °C for 15 h. An additional 0.100 g Burgess reagent was added after this time to ensure complete dehydration. After stirring at 90 °C for an additional 4 h the mixture was cooled and diluted with saturated  $\text{NaHCO}_3$  and  $\text{CH}_2\text{Cl}_2$ . The organic layer was separated and the aqueous layer extracted twice with  $\text{CH}_2\text{Cl}_2$ . The combined

organic extracts were dried over Na<sub>2</sub>SO<sub>4</sub>, filtered, and concentrated under reduced pressure. Purification by flash chromatography (60% EtOAc/PE) gave 0.027 g (48%) of the *N*-Boc oxindole **34** as a yellow oil. *R*<sub>f</sub> = 0.30 (50% EtOAc/PE); <sup>1</sup>H NMR (500 MHz, CDCl<sub>3</sub>) δ 7.84 (dd, *J* = 8.0, <1.0 Hz, 1H), 7.43 (dd, *J* = 8.0, 8.0 Hz, 1H), 7.15 (d, *J* = 7.9, 1H), 6.84 (d, *J* = 6.7, 1H), 4.20 (m, 1H), 3.77 (dddd, *J* = 6.8, 6.8, 1.4, 1.4 Hz, 1H), 3.11 (dd, *J* = 18.8, 6.9 Hz, 1H), 2.80 (d, *J* = 18.8, 1H), 2.10 (s, 3H), 1.64 (s, 9H); <sup>13</sup>C NMR (125 MHz, CDCl<sub>3</sub>) δ 201.3, 164.7, 150.8, 149.0, 140.2, 133.4, 132.0, 128.7, 128.3, 124.7, 119.0, 115.8, 115.6, 109.5, 84.9, 55.7, 49.8, 39.1, 28.3, 22.8; IR (film) 2981, 2211, 1785, 1732, 1599, 1447, 1369, 1336, 1305, 1282, 1254, 1207, 1153, 1097, 1074, 1046 cm<sup>-1</sup>.

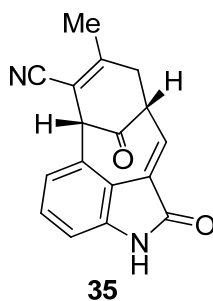

### Oxindole **35**

A solution of the Diels-Alder adduct **31** (0.030 g, 0.076 mmole) and Yb(OTf)<sub>3</sub>-H<sub>2</sub>O (0.005 g, 0.0076 mmole) in 1 mL dichloroethane was heated to 50 °C for 45 min. The mixture was cooled and diluted with saturated NaHCO<sub>3</sub> and CH<sub>2</sub>Cl<sub>2</sub>. The organic layer was separated and the aqueous layer extracted twice with CH<sub>2</sub>Cl<sub>2</sub>. The combined organic extracts were dried over Na<sub>2</sub>SO<sub>4</sub>, filtered, and concentrated under reduced pressure. Purification by flash chromatography (70% EtOAc/PE) gave 0.0104 g (50%) of the oxindole **35** as a yellow solid. *R*<sub>f</sub> = 0.15 (50% EtOAc/PE); m.p. = 150-160 °C (decomp); <sup>1</sup>H NMR (500 MHz, CDCl<sub>3</sub>) δ 8.07 (bs, 1H), 7.31 (dd, *J* = 7.9, 7.9 Hz, 1H), 7.01 (d, *J* = 7.8, 1H), 6.84 (dd, *J* = 7.9, <1.0 Hz, 1H), 6.79 (d, *J* = 6.8 Hz, 1H), 4.18 (m, 1H), 3.78 (dd, *J* = 7.0, 7.0 Hz, 1H), 3.11 (dd, *J* = 18.9, 7.0 Hz, 1H), 2.81 (d, *J* = 18.8, 1H), 2.11 (s, 3H). <sup>13</sup>C NMR (100 MHz, CDCl<sub>3</sub>) δ 201.7, 168.2, 150.8, 141.3, 132.7, 131.9, 129.6, 129.2, 122.6, 119.5, 116.0, 110.4, 109.6, 55.7, 49.9, 39.2, 22.9; IR (film) 3270 (b), 2212, 1714, 1656, 1614, 1453, 1306, 1241, 1152 cm<sup>-1</sup>; [α]<sup>23</sup><sub>D</sub> = -193.3 (c 1.0 CH<sub>2</sub>Cl<sub>2</sub>, 94% ee); MS (HRMS) for C<sub>17</sub>H<sub>12</sub>N<sub>2</sub>O<sub>2</sub> calc. [M + Na] 299.0796, found 299.0785.

<sup>1</sup> Anciaux, A. J.; Demonceau, A.; Noels, A. F.; Hubert, A. J.; Warin, R.; Teyssie, P. *J. Org. Chem.* **1981**, *46*, 873-876.

<sup>2</sup> Padwa, A.; Crawford, K. R.; Rashatasakhon, P.; Rose, M. *J. Org. Chem.* **2003**, *68*, 2609-2617.

<sup>3</sup> Padwa, A.; Dimitroff, M.; Waterson, A. G.; Wu, T. *J. Org. Chem.* **1997**, *62*, 4088-4096.

<sup>4</sup> Aldrich Chemical Company. Catalog #665290

<sup>5</sup> Trost, B. M.; Cramer, N.; Silverman, S. M. *J. Am. Chem. Soc.* **2007**, *129*, 12396-12397.

<sup>6</sup> Burgess, E. M.; Penton, H. R.; Taylor, E. A.; Williams, W. M., *Org. Synth.* **1988**, *50*, 788-791.

---

<sup>7</sup> Lynch, S. W.; Bur, S. K.; Padwa, A. *Org. Lett.* **2002**, *4*, 4643-4645.
