# Supplementary material
Source: PubMed Central journal article supplement (PMC2736368)
Supplement: NIHMS133295-supplement-2_si_002.pdf [file NIHMS133295-supplement-2_si_002.pdf]

# Access to a Welwitindolinone Core Using Sequential Cycloadditions

Barry M. Trost\*, Patrick J. McDougall

*Department of Chemistry, Stanford University, Stanford, California 94305-5080*

$^1\text{H}$  and  $^{13}\text{C}$  NMR Spectra

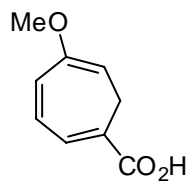

Carboxylic Acid 15  
400 MHz, CDCl<sub>3</sub>

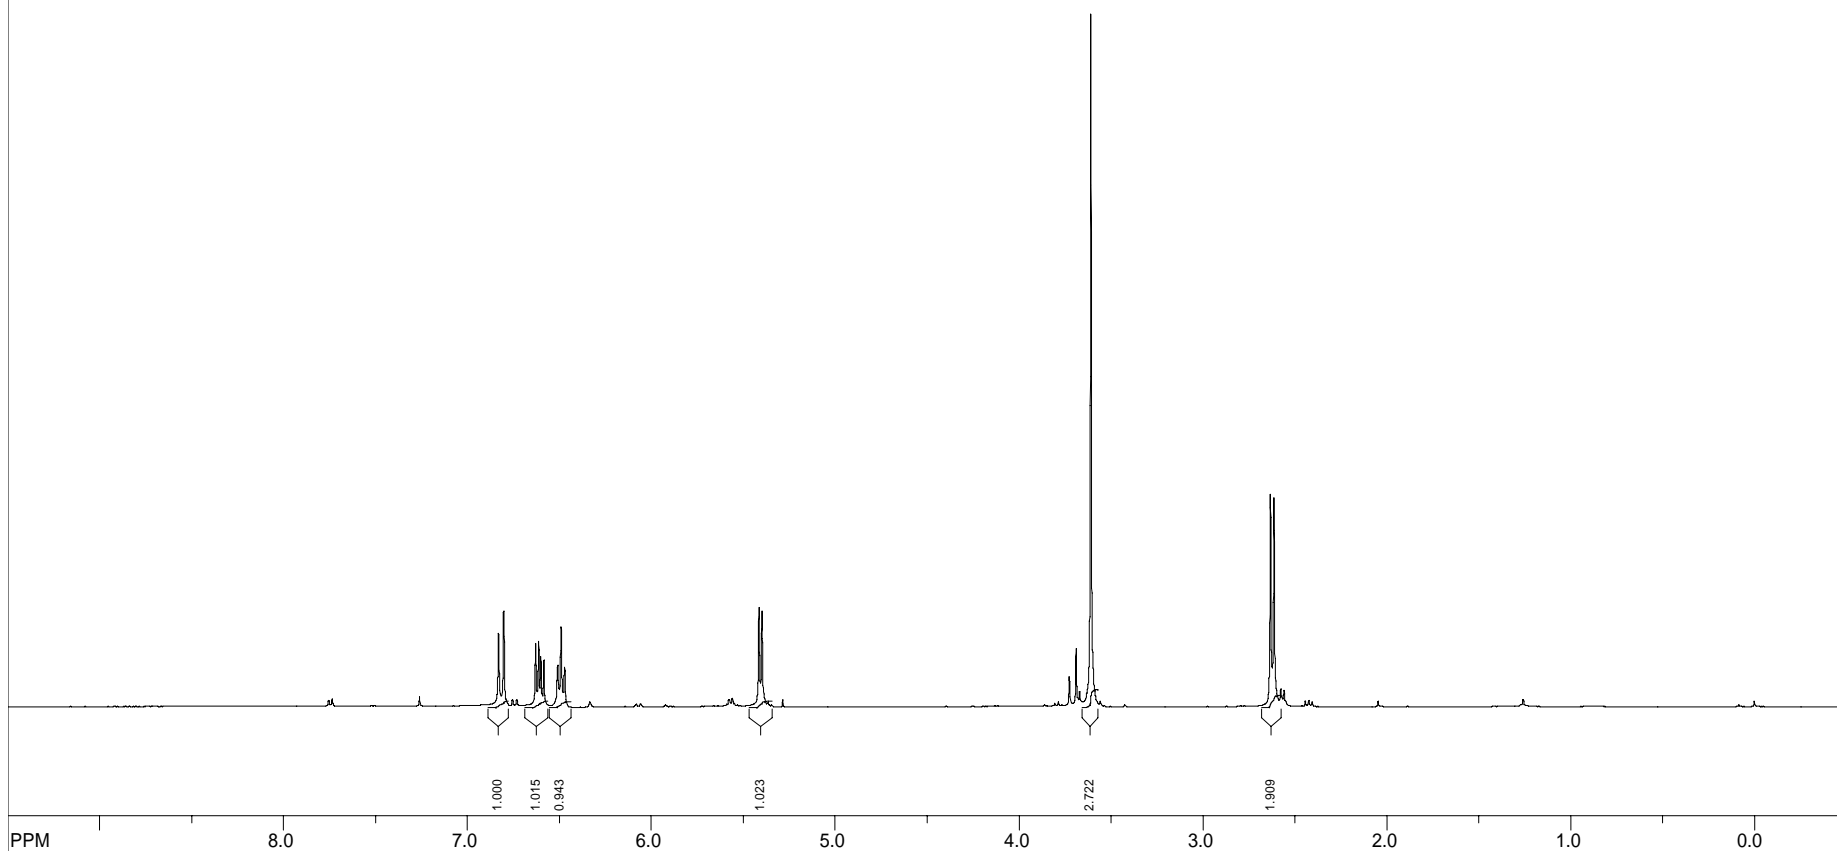

file: C:\Documents and Settings\Patrick\My Documents\PostDoc Chem\NMR data\Comp Data-31P\JM3-062col.fid\fid block# 1 expt "s2pu"  
transmitter freq.: 399.749384 MHz  
time domain size: 44844 points  
width: 5605.38 Hz = 14.022238 ppm = 0.124997 Hz/pt  
number of scans: 12

freq. of 0 ppm: 399.747384 MHz  
processed size: 65536 complex points  
LB: 0.000 GB: 0.0000

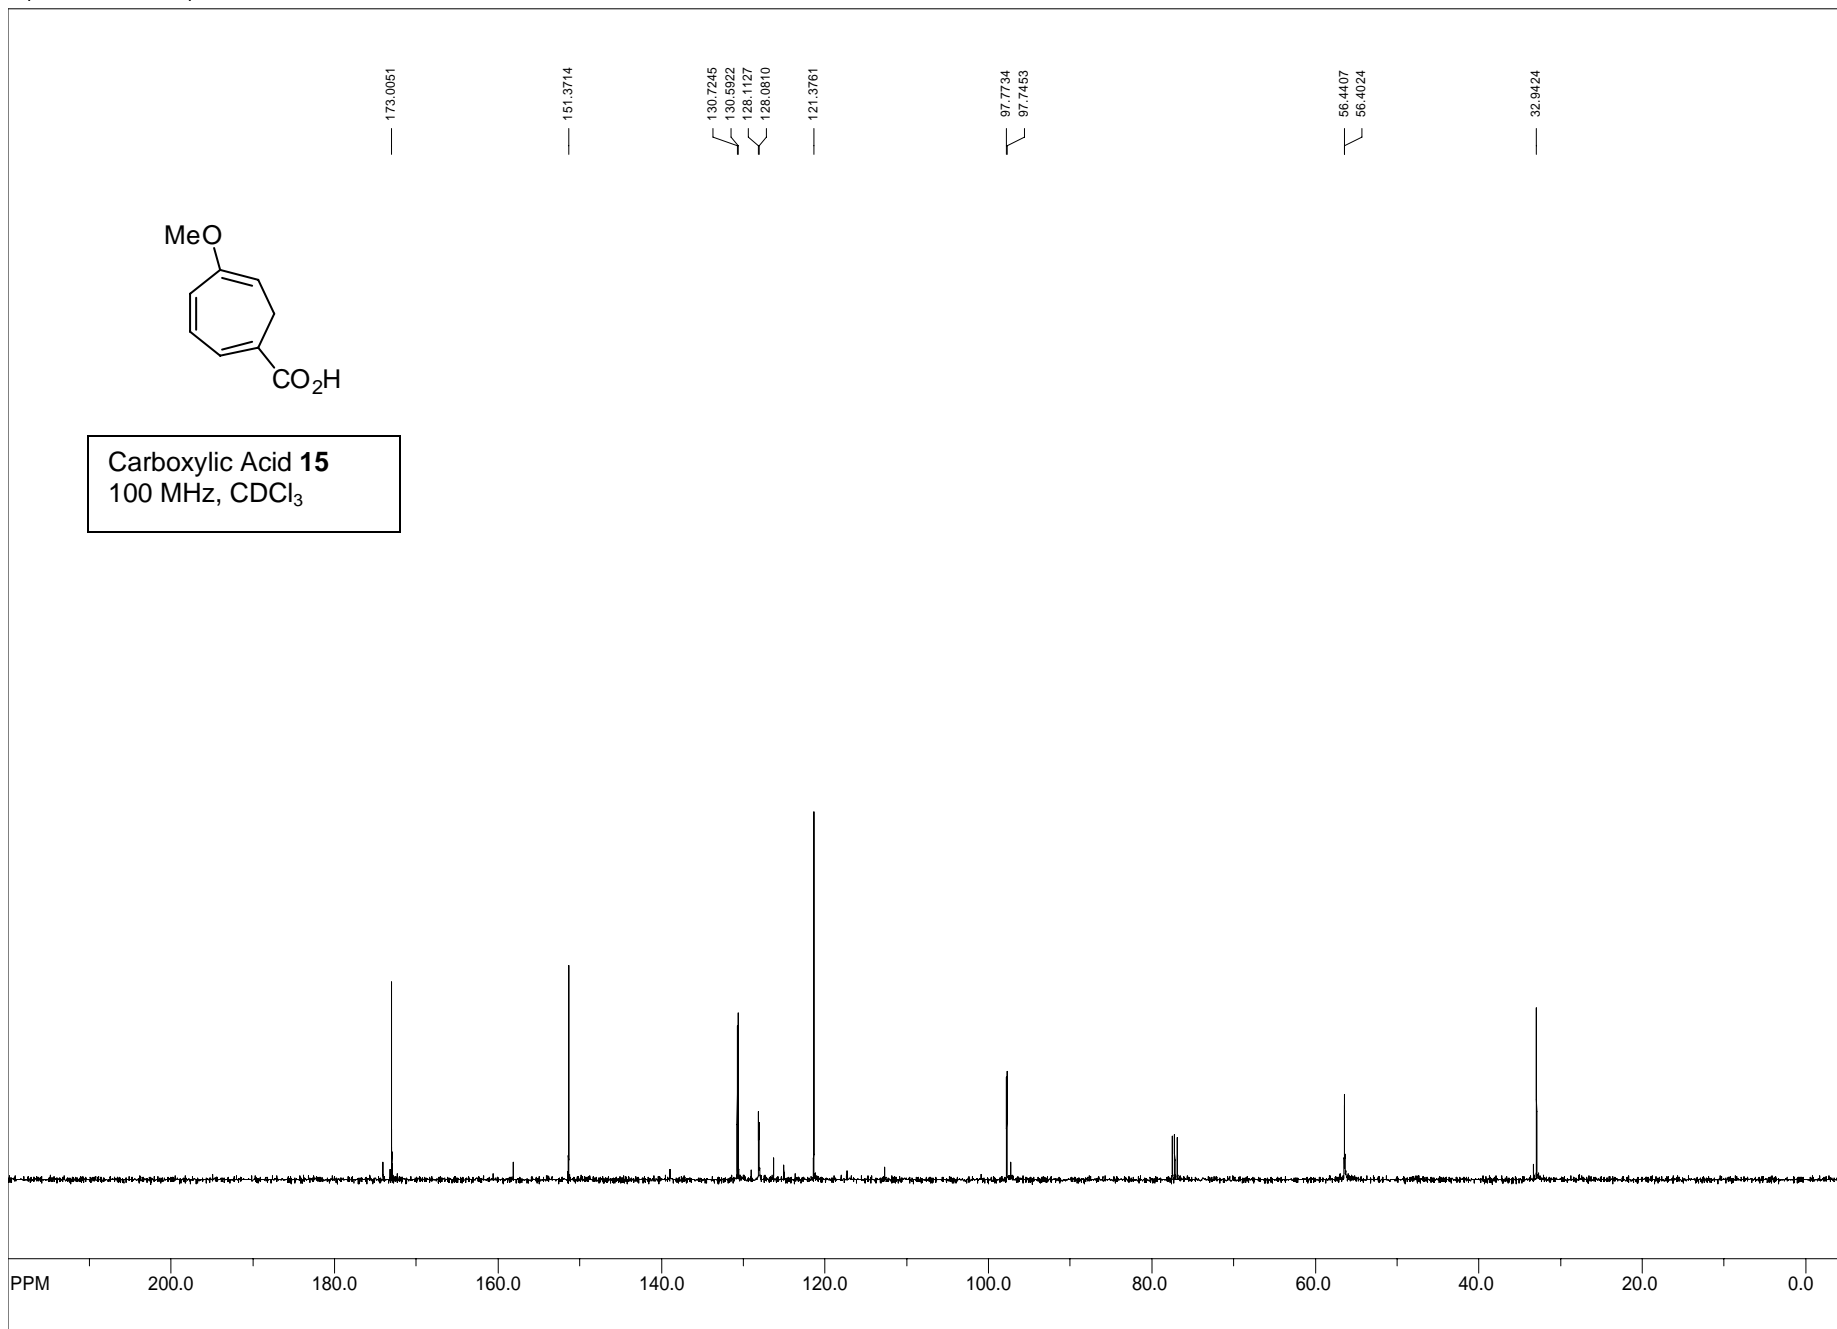

file: C:\Documents and Settings\Patrick\My Documents\PostDoc Chem\NMR data\Comp Data-31PJM3-062C13.fid\fid block# 1 expt: "s2pu"  
transmitter freq.: 100.527090 MHz  
time domain size: 63750 points  
width: 24509.80 Hz = 243.812925 ppm = 0.384468 Hz/pt  
number of scans: 120

freq. of 0 ppm: 100.516546 MHz  
processed size: 65536 complex points  
LB: 0.000 GB: 0.0000

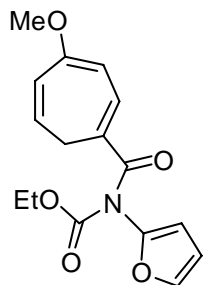

Cycloheptatriene **16**  
400 MHz, CDCl<sub>3</sub>

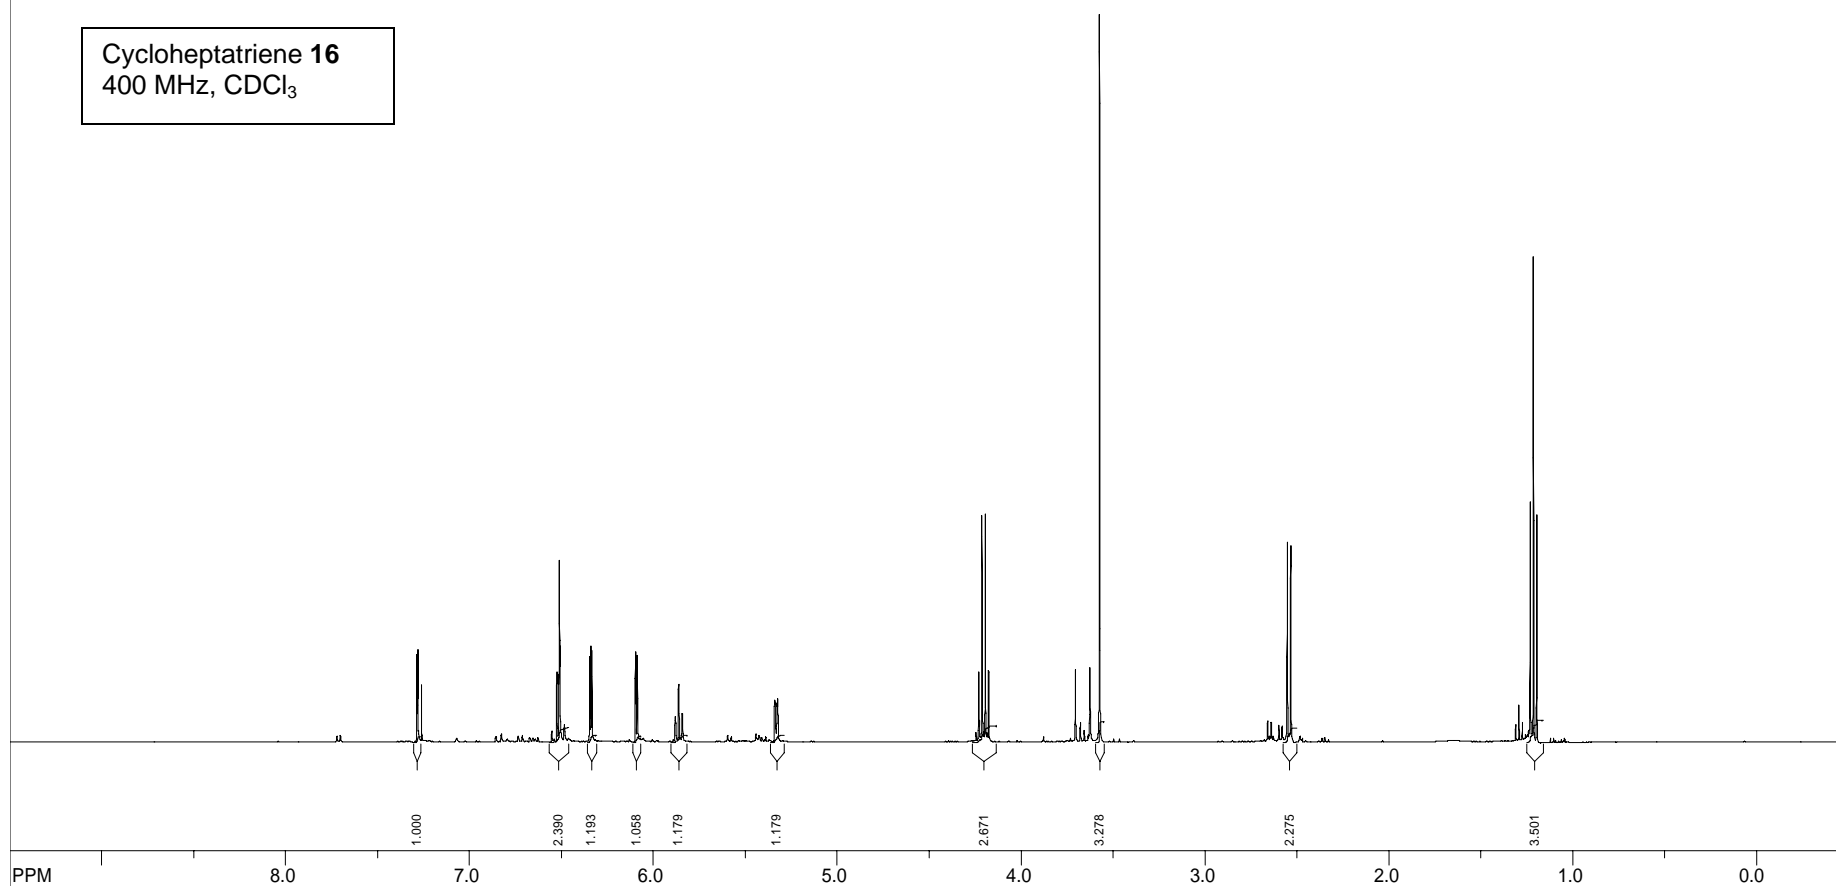

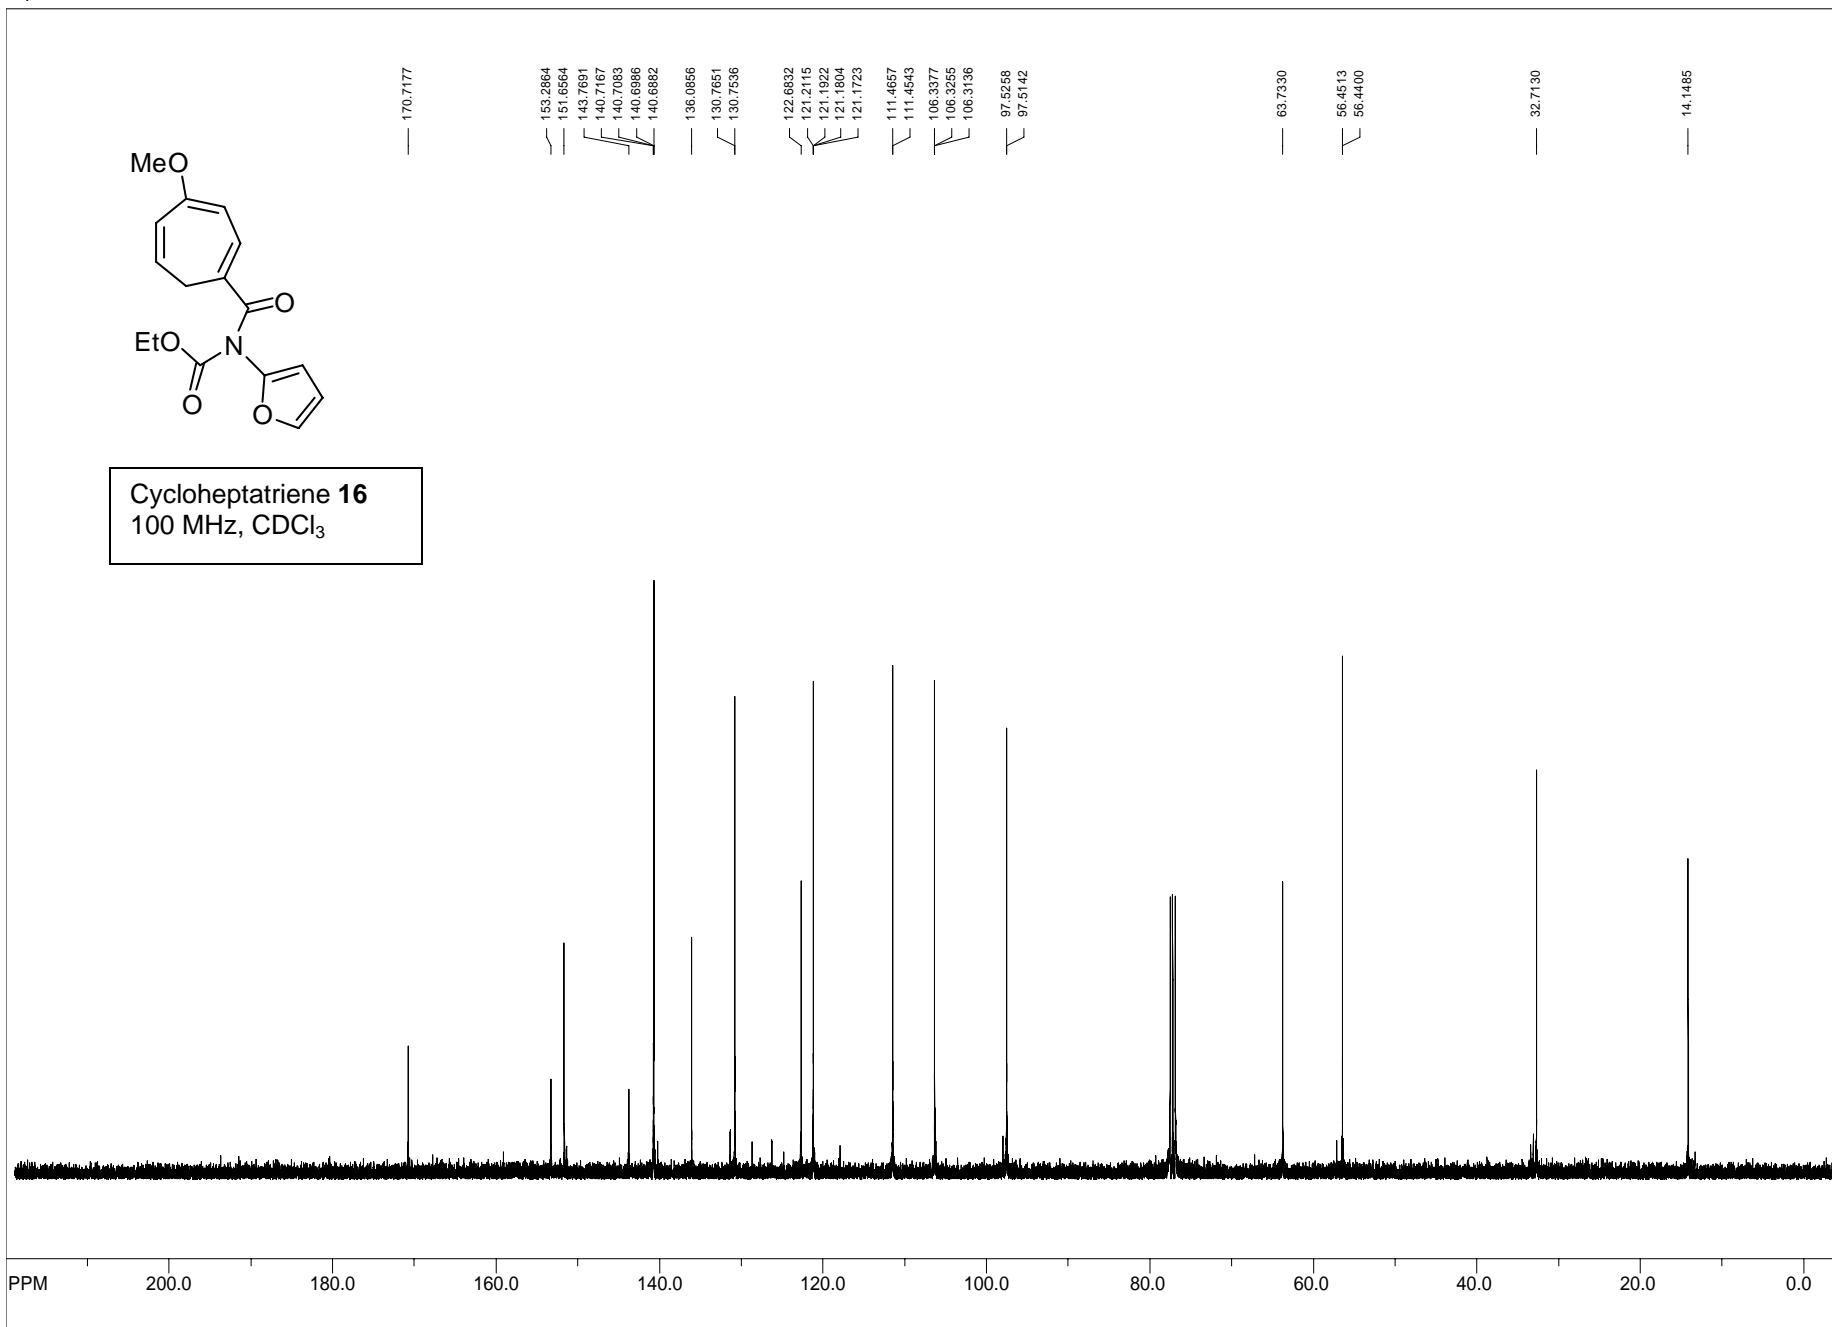

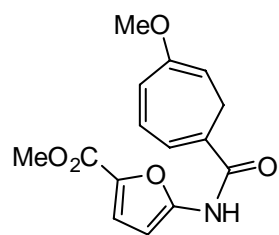

Cycloheptatriene Amide  
400 MHz, CDCl<sub>3</sub>

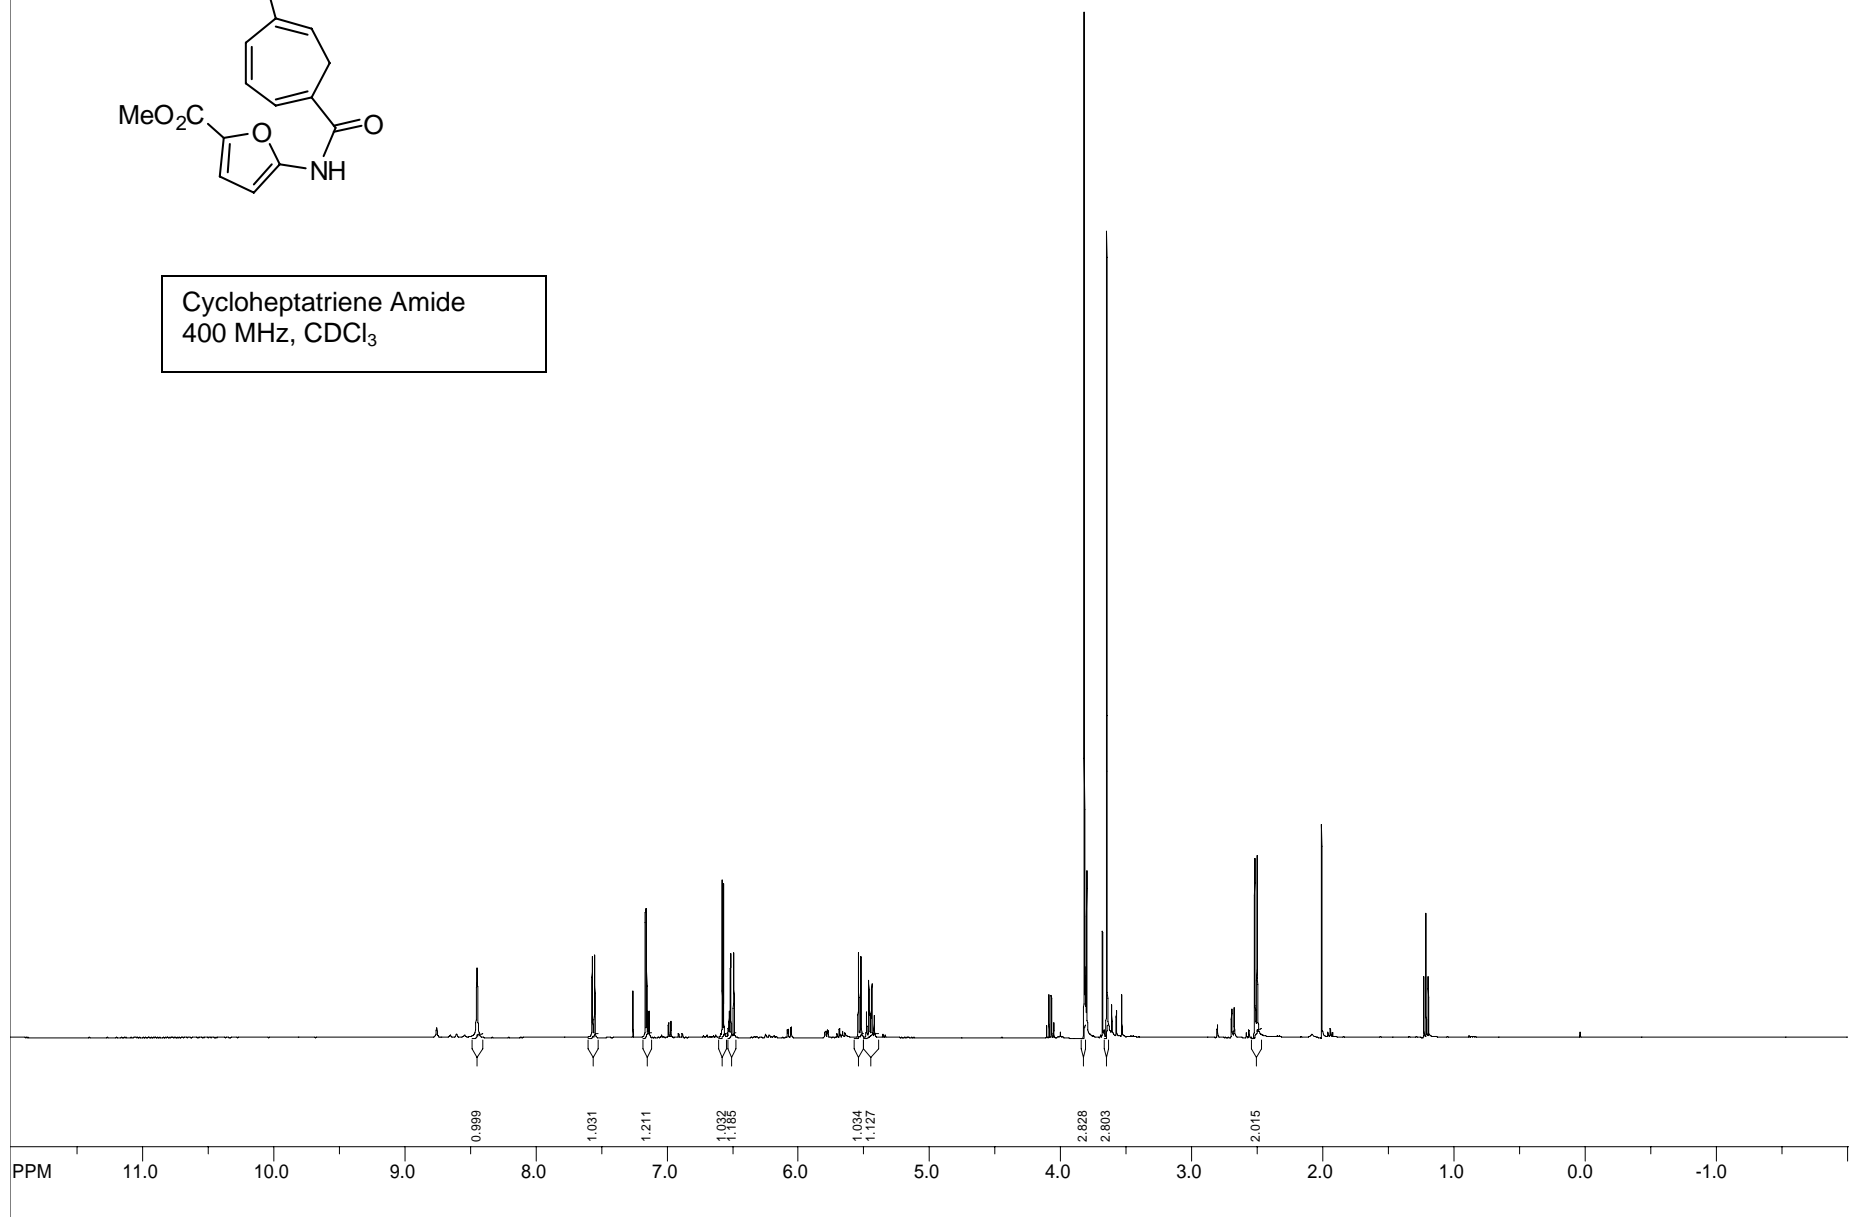

file: C:\Documents and Settings\Patrick\My Documents\PostDoc Chem\NMR data\Comp Data-51PJM5-079col.fid\fid block# 1 expt "s2pu"  
transmitter freq.: 399.749384 MHz  
time domain size: 44844 points  
width: 5605.38 Hz = 14.022238 ppm = 0.124997 Hz/pt  
number of scans: 16

freq. of 0 ppm: 399.747385 MHz  
processed size: 65536 complex points  
LB: 0.000 GB: 0.0000

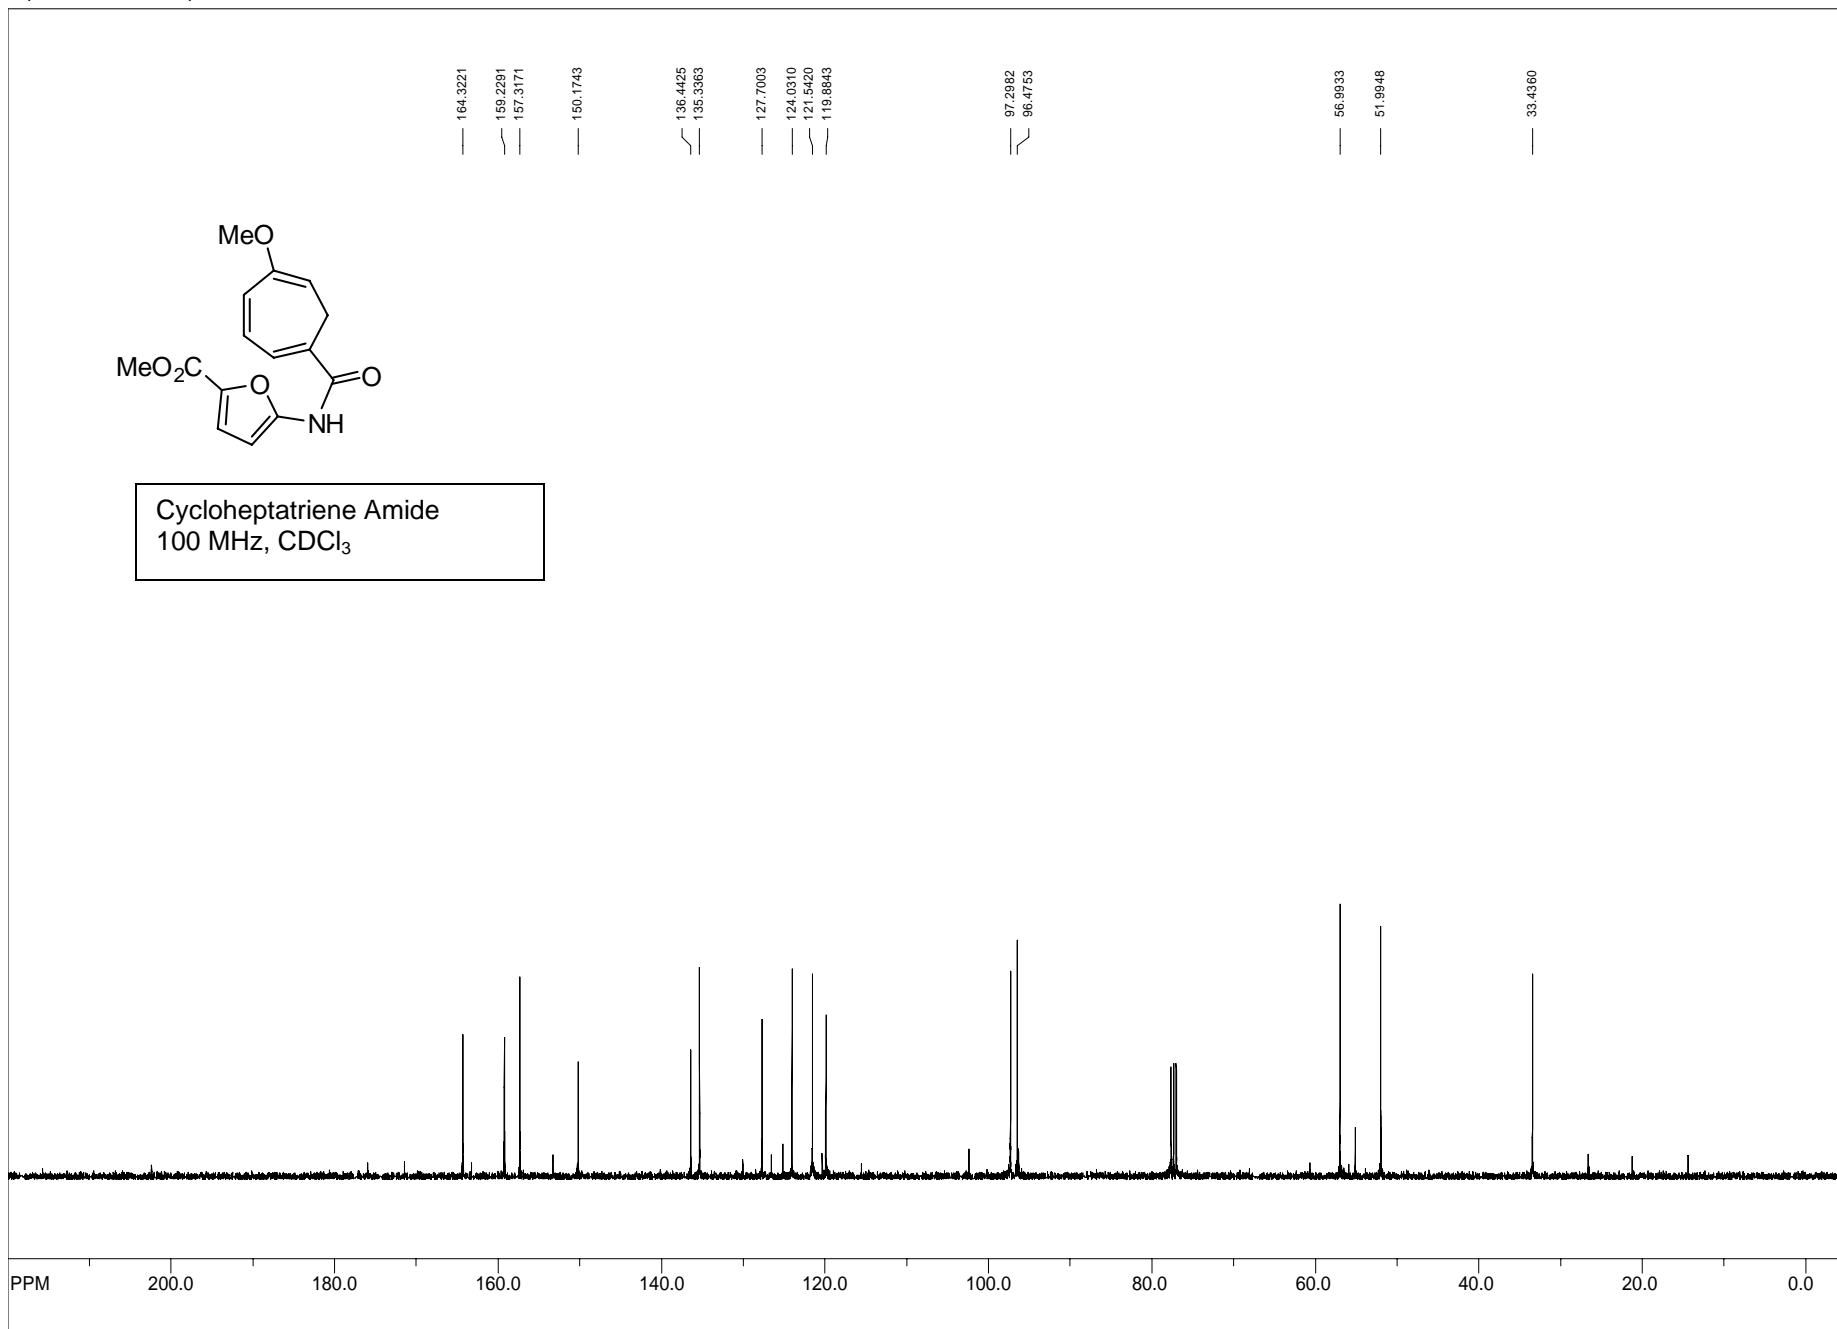

file: C:\Documents and Settings\Patrick\My Documents\PostDoc Chem\NMR data\Comp Data-5\PM5-079C13.fid\fid block# 1 expt: "s2pu"  
transmitter freq.: 100.527090 MHz  
time domain size: 63750 points  
width: 24509.80 Hz = 243.812925 ppm = 0.384468 Hz/pt  
number of scans: 76

freq. of 0 ppm: 100.516536 MHz  
processed size: 65536 complex points  
LB: 0.000 GB: 0.0000

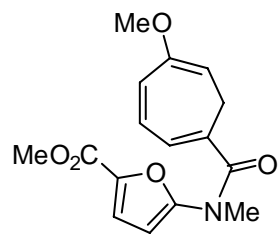

**N-Methyl Amide 17**  
400 MHz, CDCl<sub>3</sub>

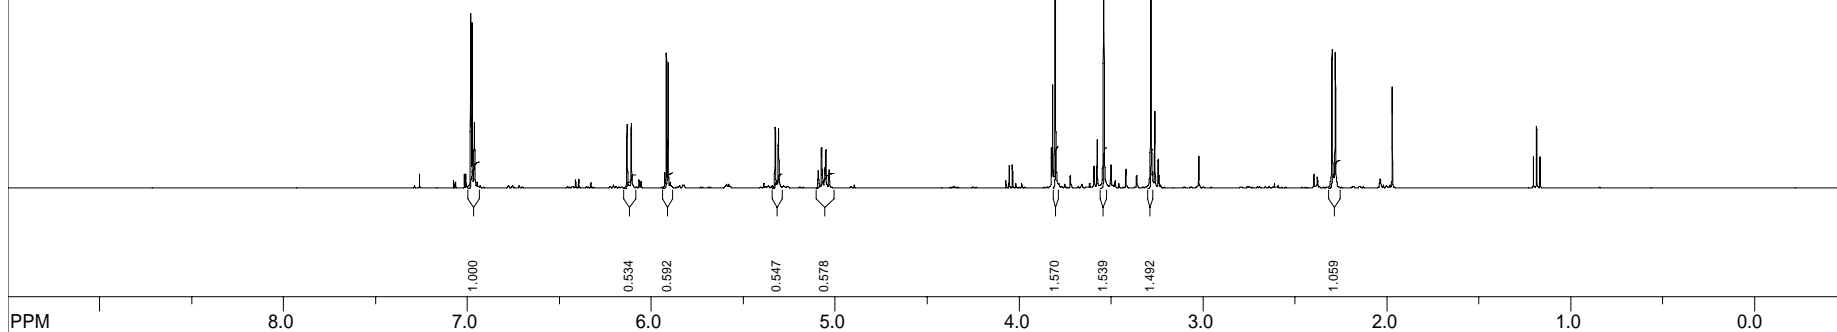



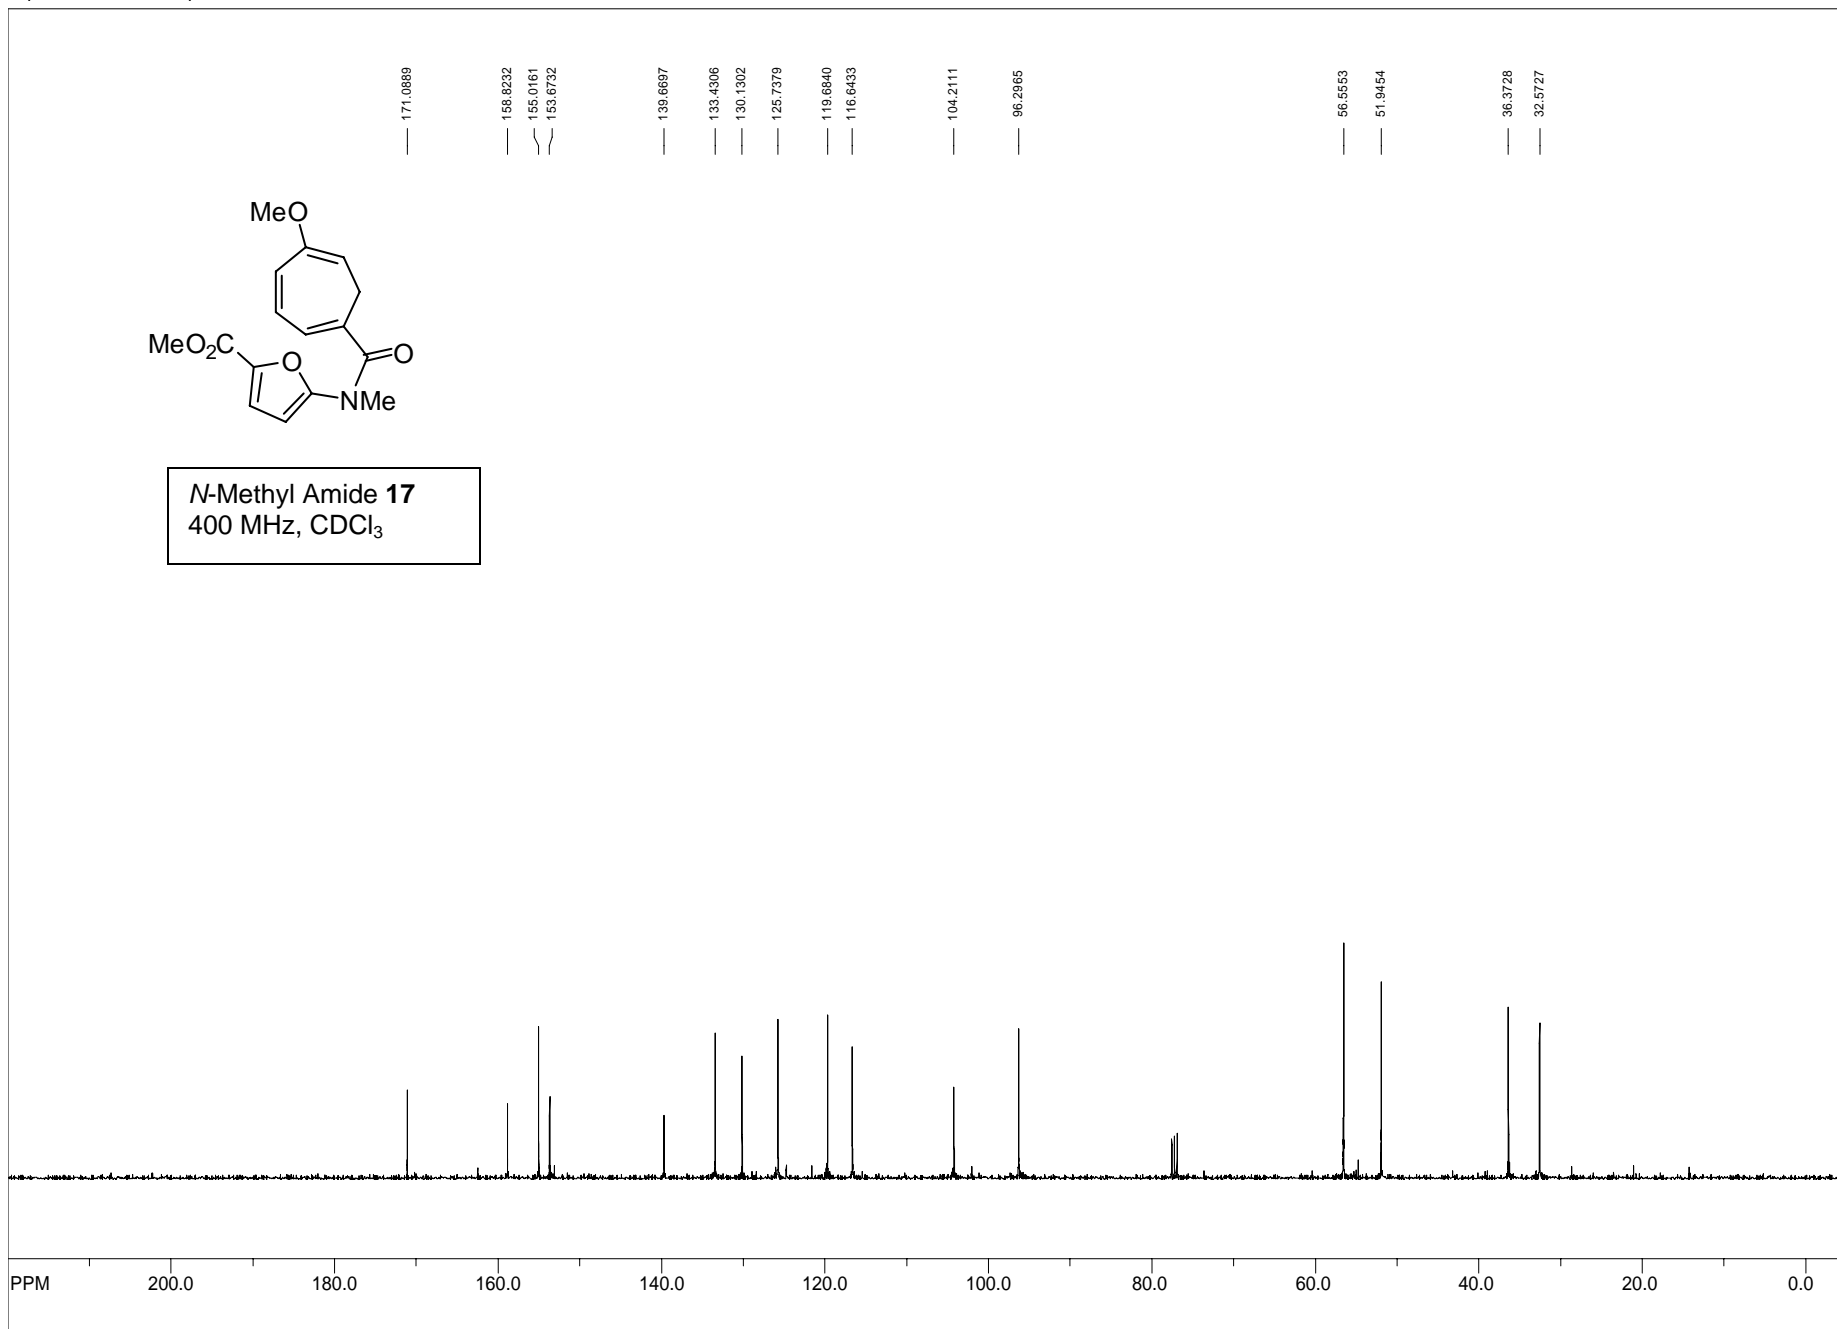

file: C:\Documents and Settings\Patrick\My Documents\PostDoc Chem\NMR data\Comp Data-5\PJMS-084C13.fid\fid block# 1 expt: "s2pu"  
transmitter freq.: 100.527090 MHz  
time domain size: 63750 points  
width: 24509.80 Hz = 243.812925 ppm = 0.384468 Hz/pt  
number of scans: 68

freq. of 0 ppm: 100.516550 MHz  
processed size: 65536 complex points  
LB: 0.000 GB: 0.0000

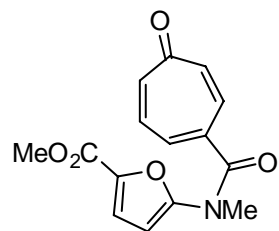

Tropone **20**  
400 MHz, CDCl<sub>3</sub>

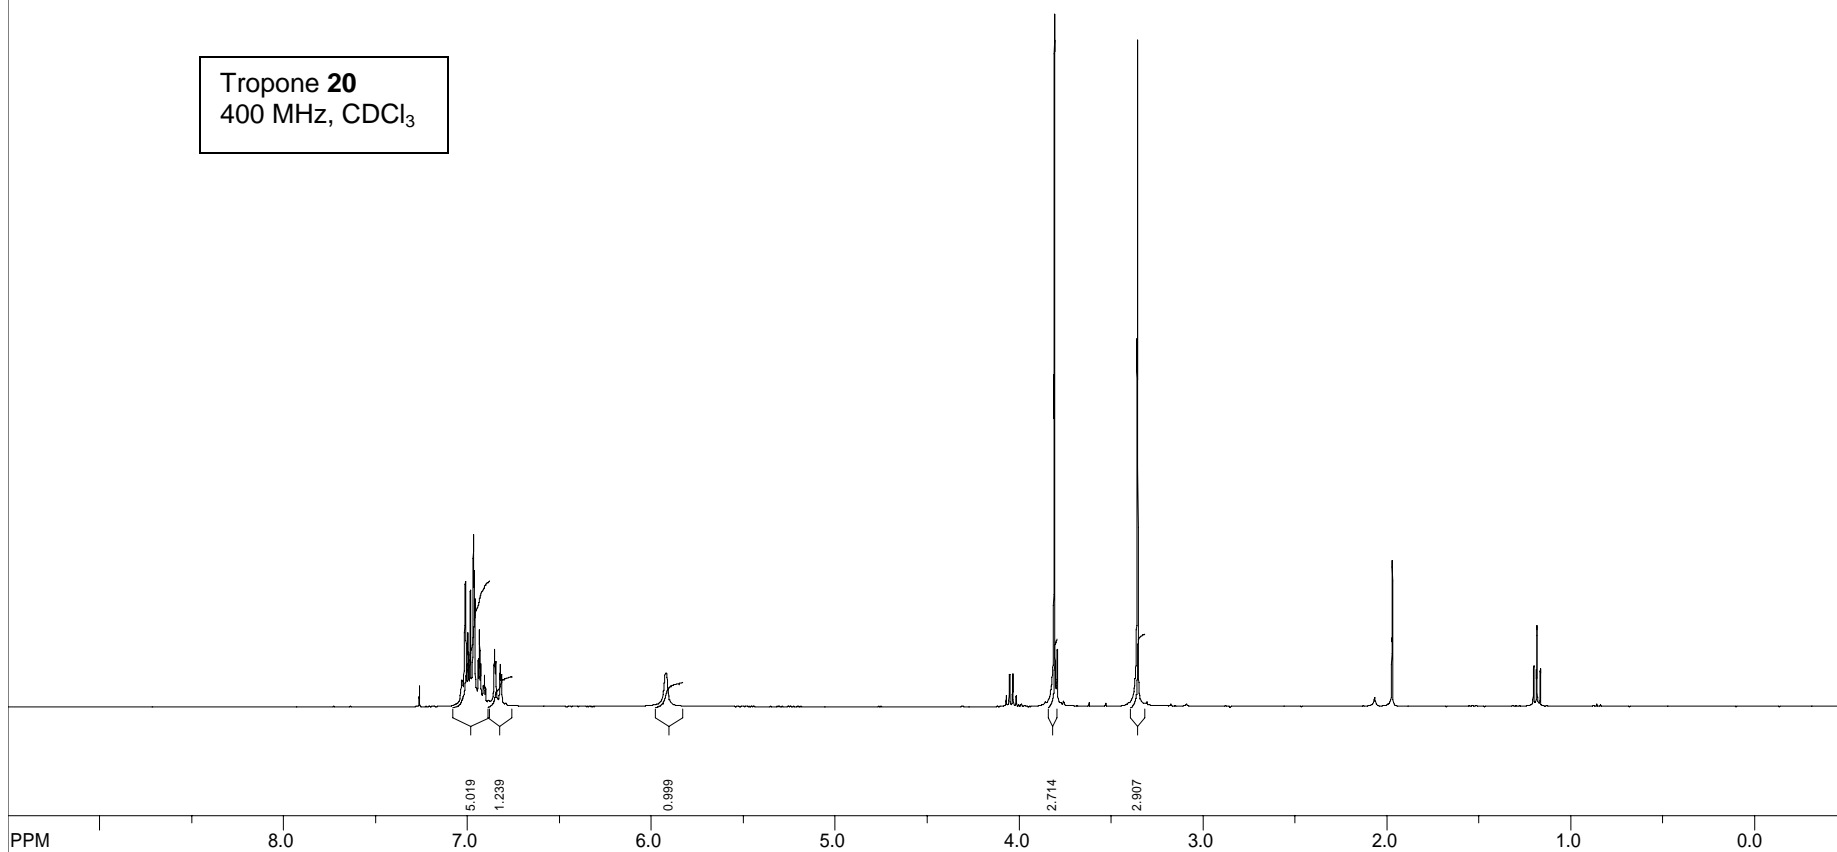

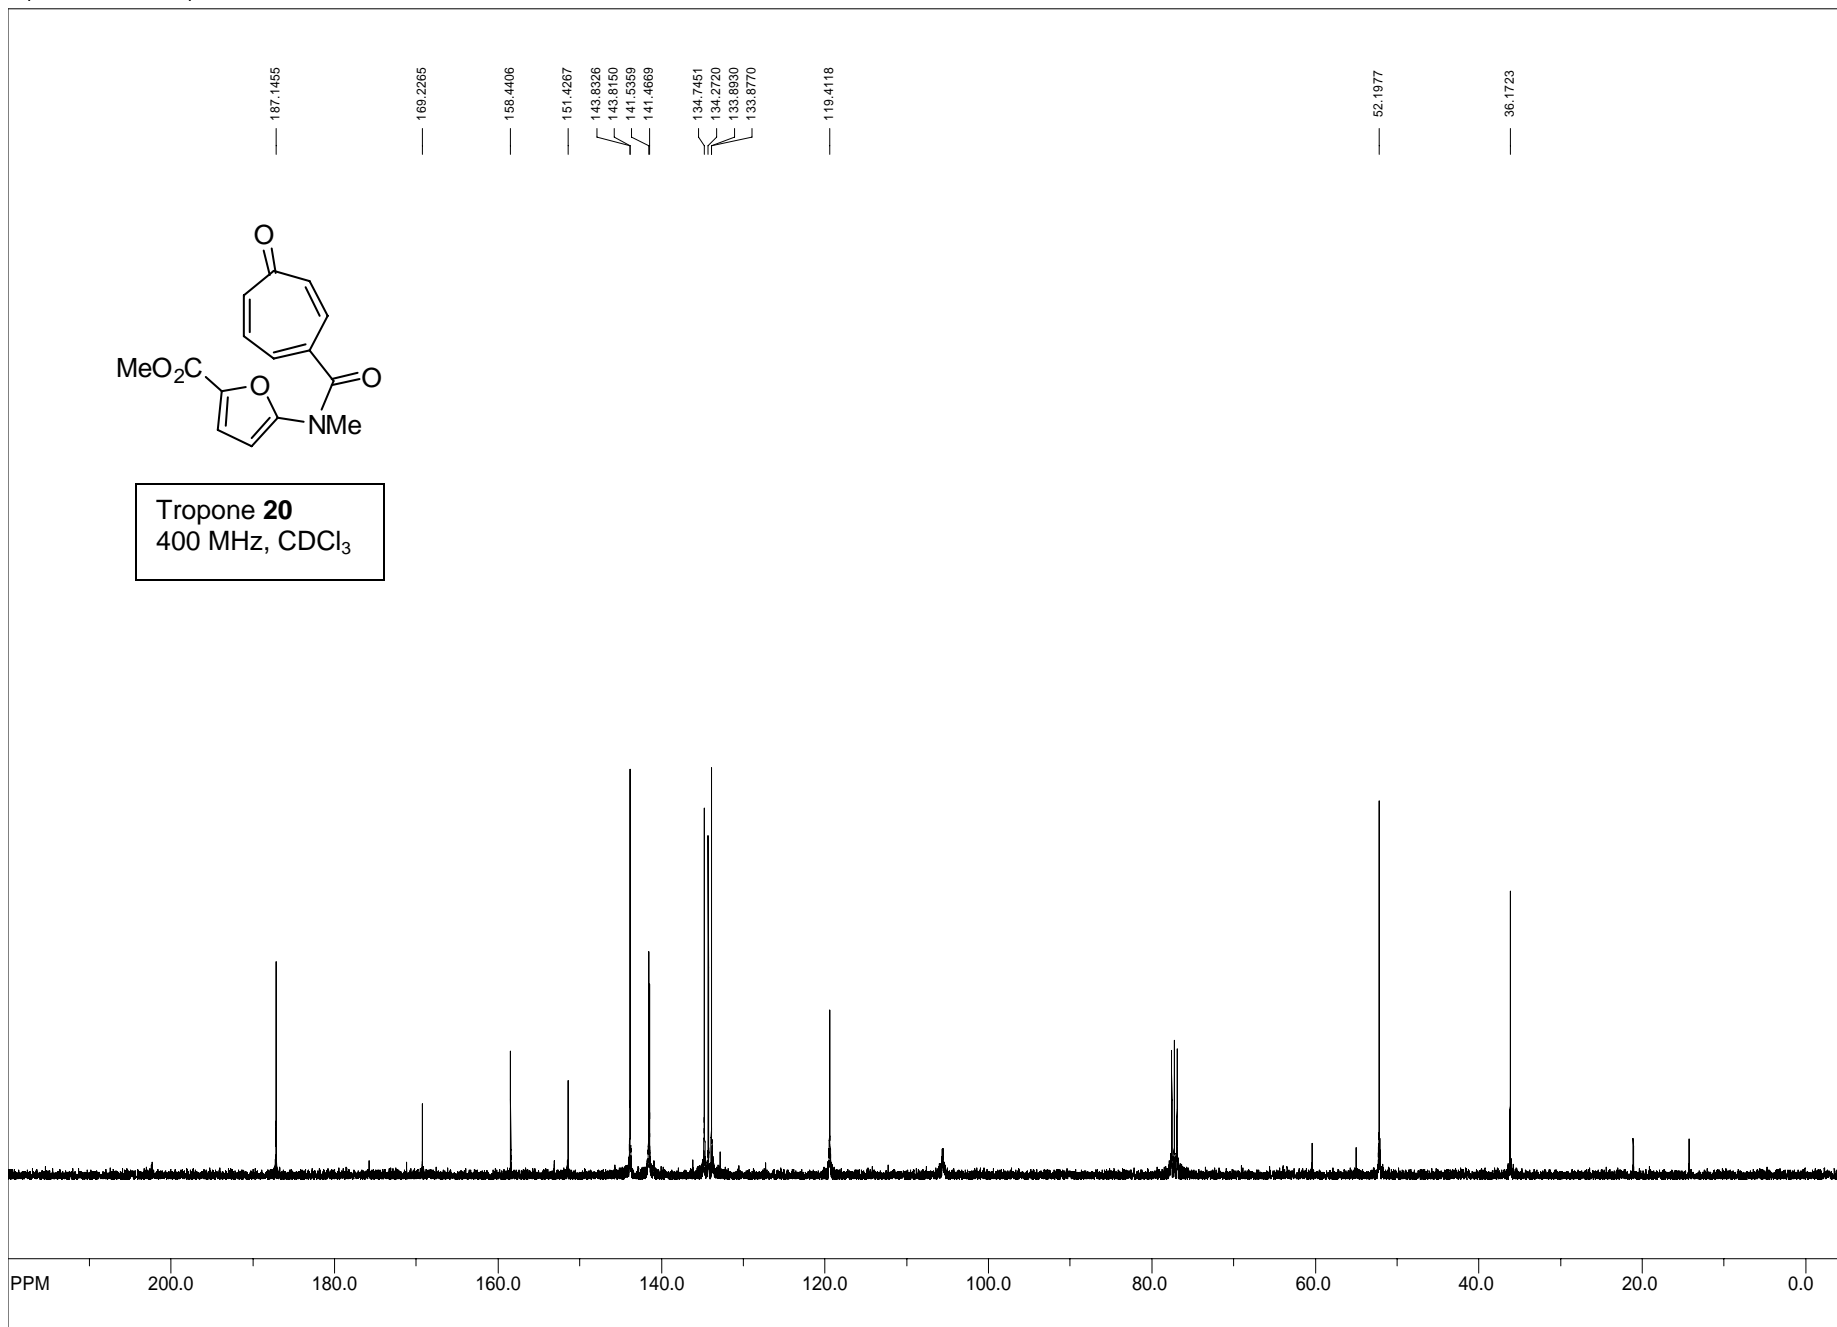

file: C:\Documents and Settings\Patrick\My Documents\PostDoc Chem\NMR data\Comp Data-5\PM5-086C13.fid\fid block# 1 expt: "s2pu"  
transmitter freq.: 100.527090 MHz  
time domain size: 63750 points  
width: 24509.80 Hz = 243.812925 ppm = 0.384468 Hz/pt  
number of scans: 144

freq. of 0 ppm: 100.516549 MHz  
processed size: 65536 complex points  
LB: 0.000 GB: 0.0000

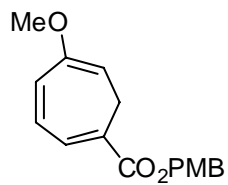

Cycloheptatriene PMB ester **18**  
400 MHz, CDCl<sub>3</sub>

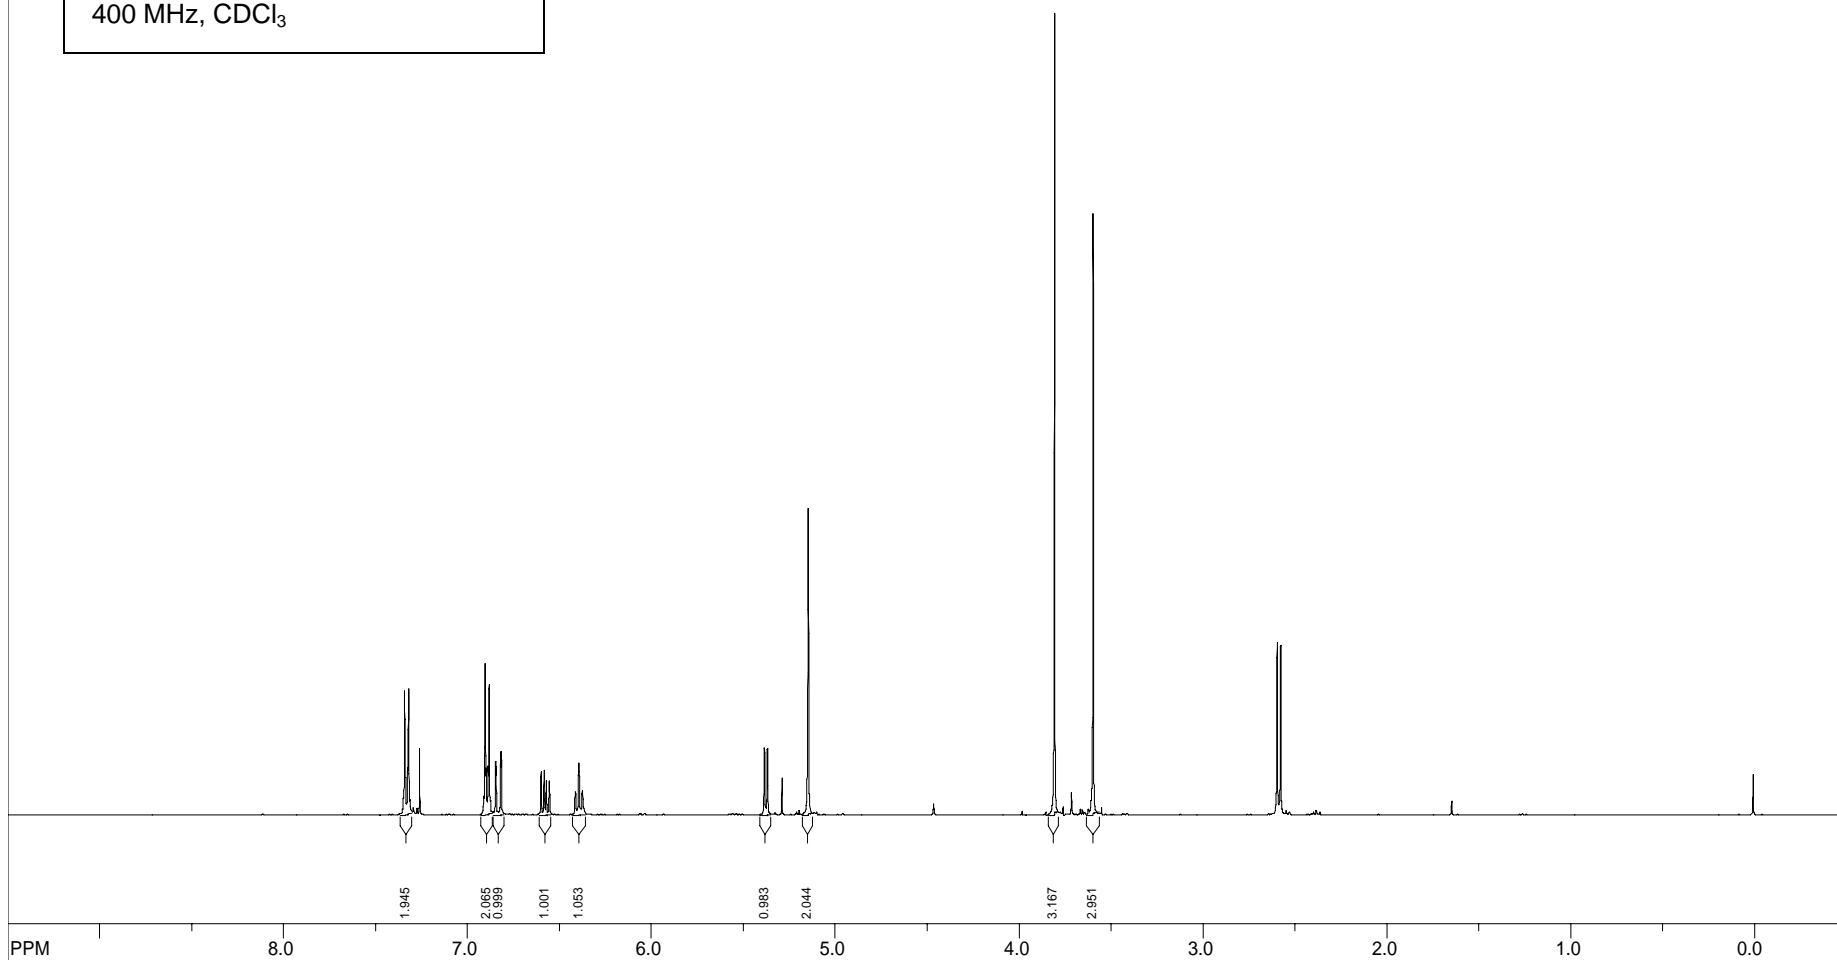

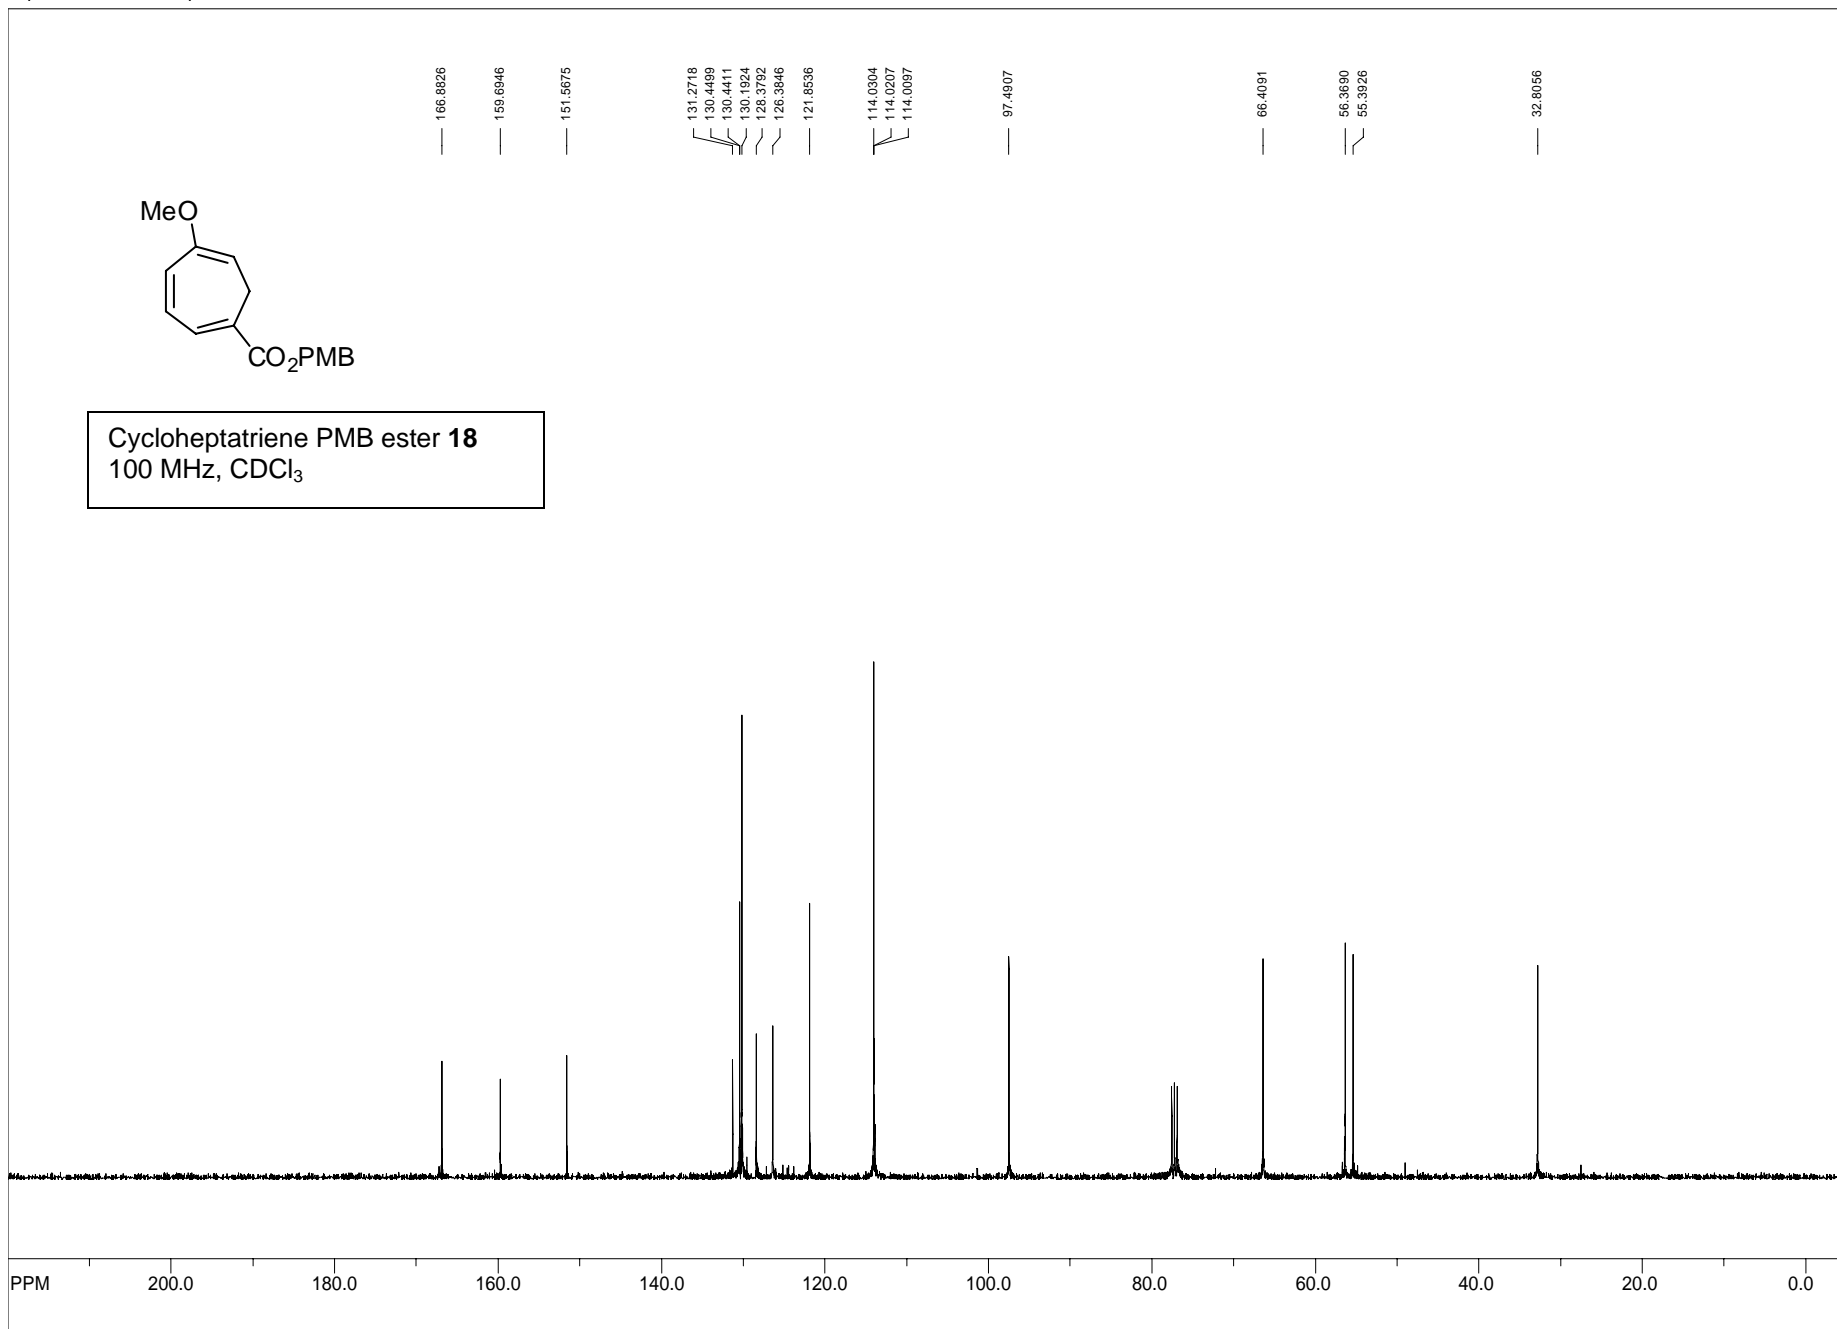

file: C:\Documents and Settings\Patrick\My Documents\PostDoc Chem\NMR data\Book 9\PM9-049C13.fid\fid block# 1 expt: "s2pu"  
transmitter freq.: 100.522503 MHz  
time domain size: 63750 points  
width: 24509.80 Hz = 243.824051 ppm = 0.384468 Hz/pt  
number of scans: 176

freq. of 0 ppm: 100.511961 MHz  
processed size: 65536 complex points  
LB: 0.000 GB: 0.0000

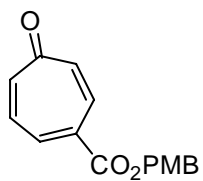

Tropone **21**  
400 MHz, CDCl<sub>3</sub>

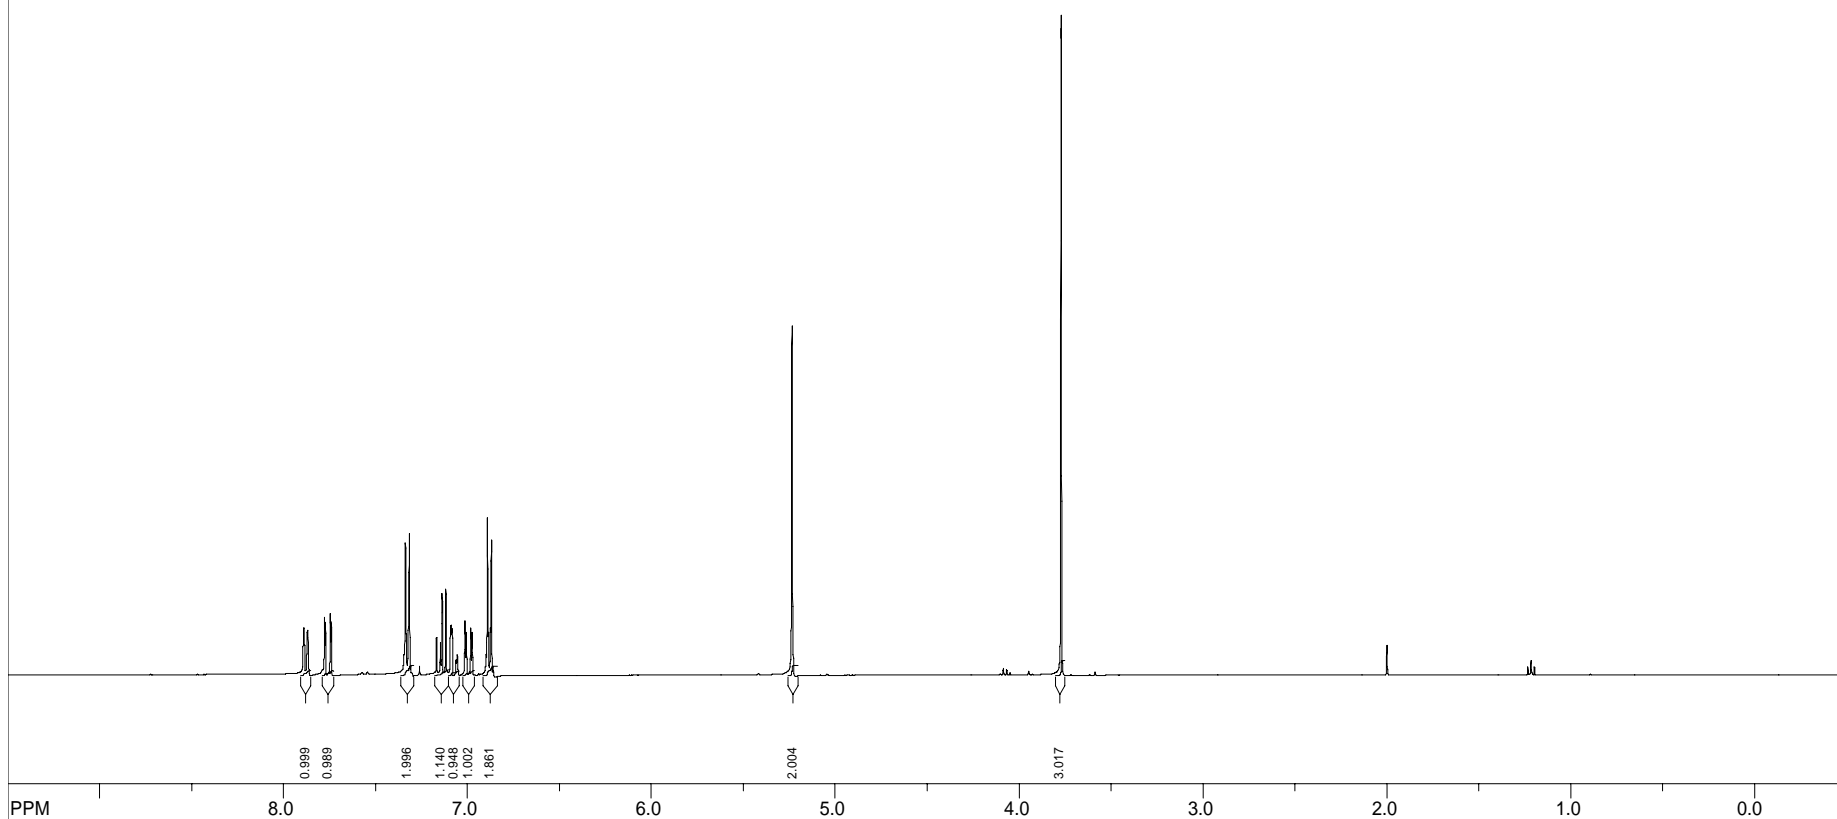

file: C:\Documents and Settings\Patrick\My Documents\PostDoc Chem\NMR data\Comp Data-31P\JM3-096anal.fid\fid block# 1 exp: "s2pu"  
transmitter freq.: 399.749384 MHz  
time domain size: 44844 points  
width: 5605.38 Hz = 14.022238 ppm = 0.124997 Hz/pt  
number of scans: 4

freq. of 0 ppm: 399.747384 MHz  
processed size: 65536 complex points  
LB: 0.000 GB: 0.0000

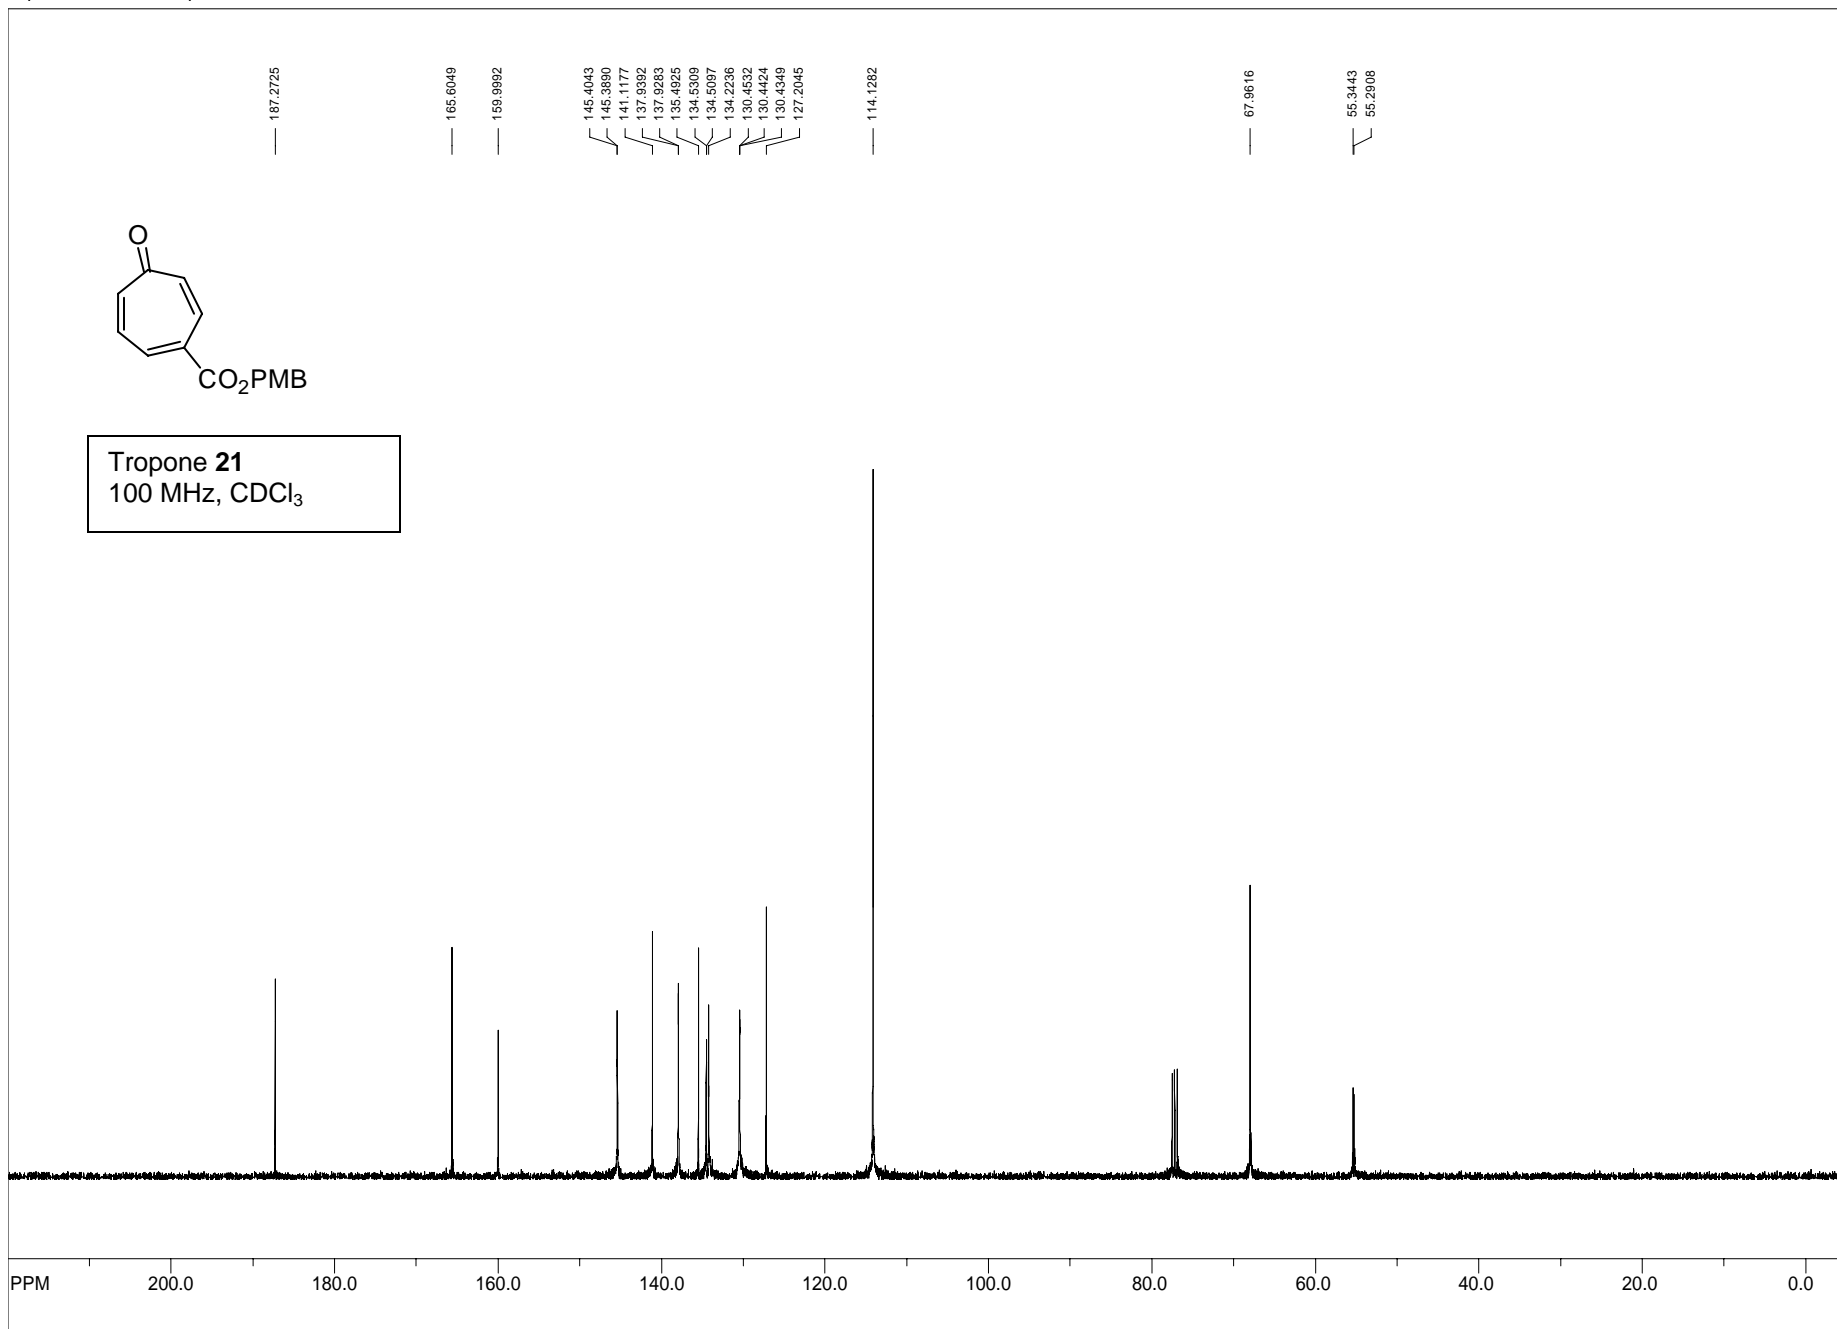

file: C:\Documents and Settings\Patrick\My Documents\PostDoc Chem\NMR data\Comp Data-31PJM3-096-13C.fid\fid block# 1 expt: \*s2pul"  
transmitter freq.: 100.527090 MHz  
time domain size: 63750 points  
width: 24509.80 Hz = 243.812925 ppm = 0.384468 Hz/pt  
number of scans: 132

freq. of 0 ppm: 100.516556 MHz  
processed size: 65536 complex points  
LB: 0.000 GB: 0.0000

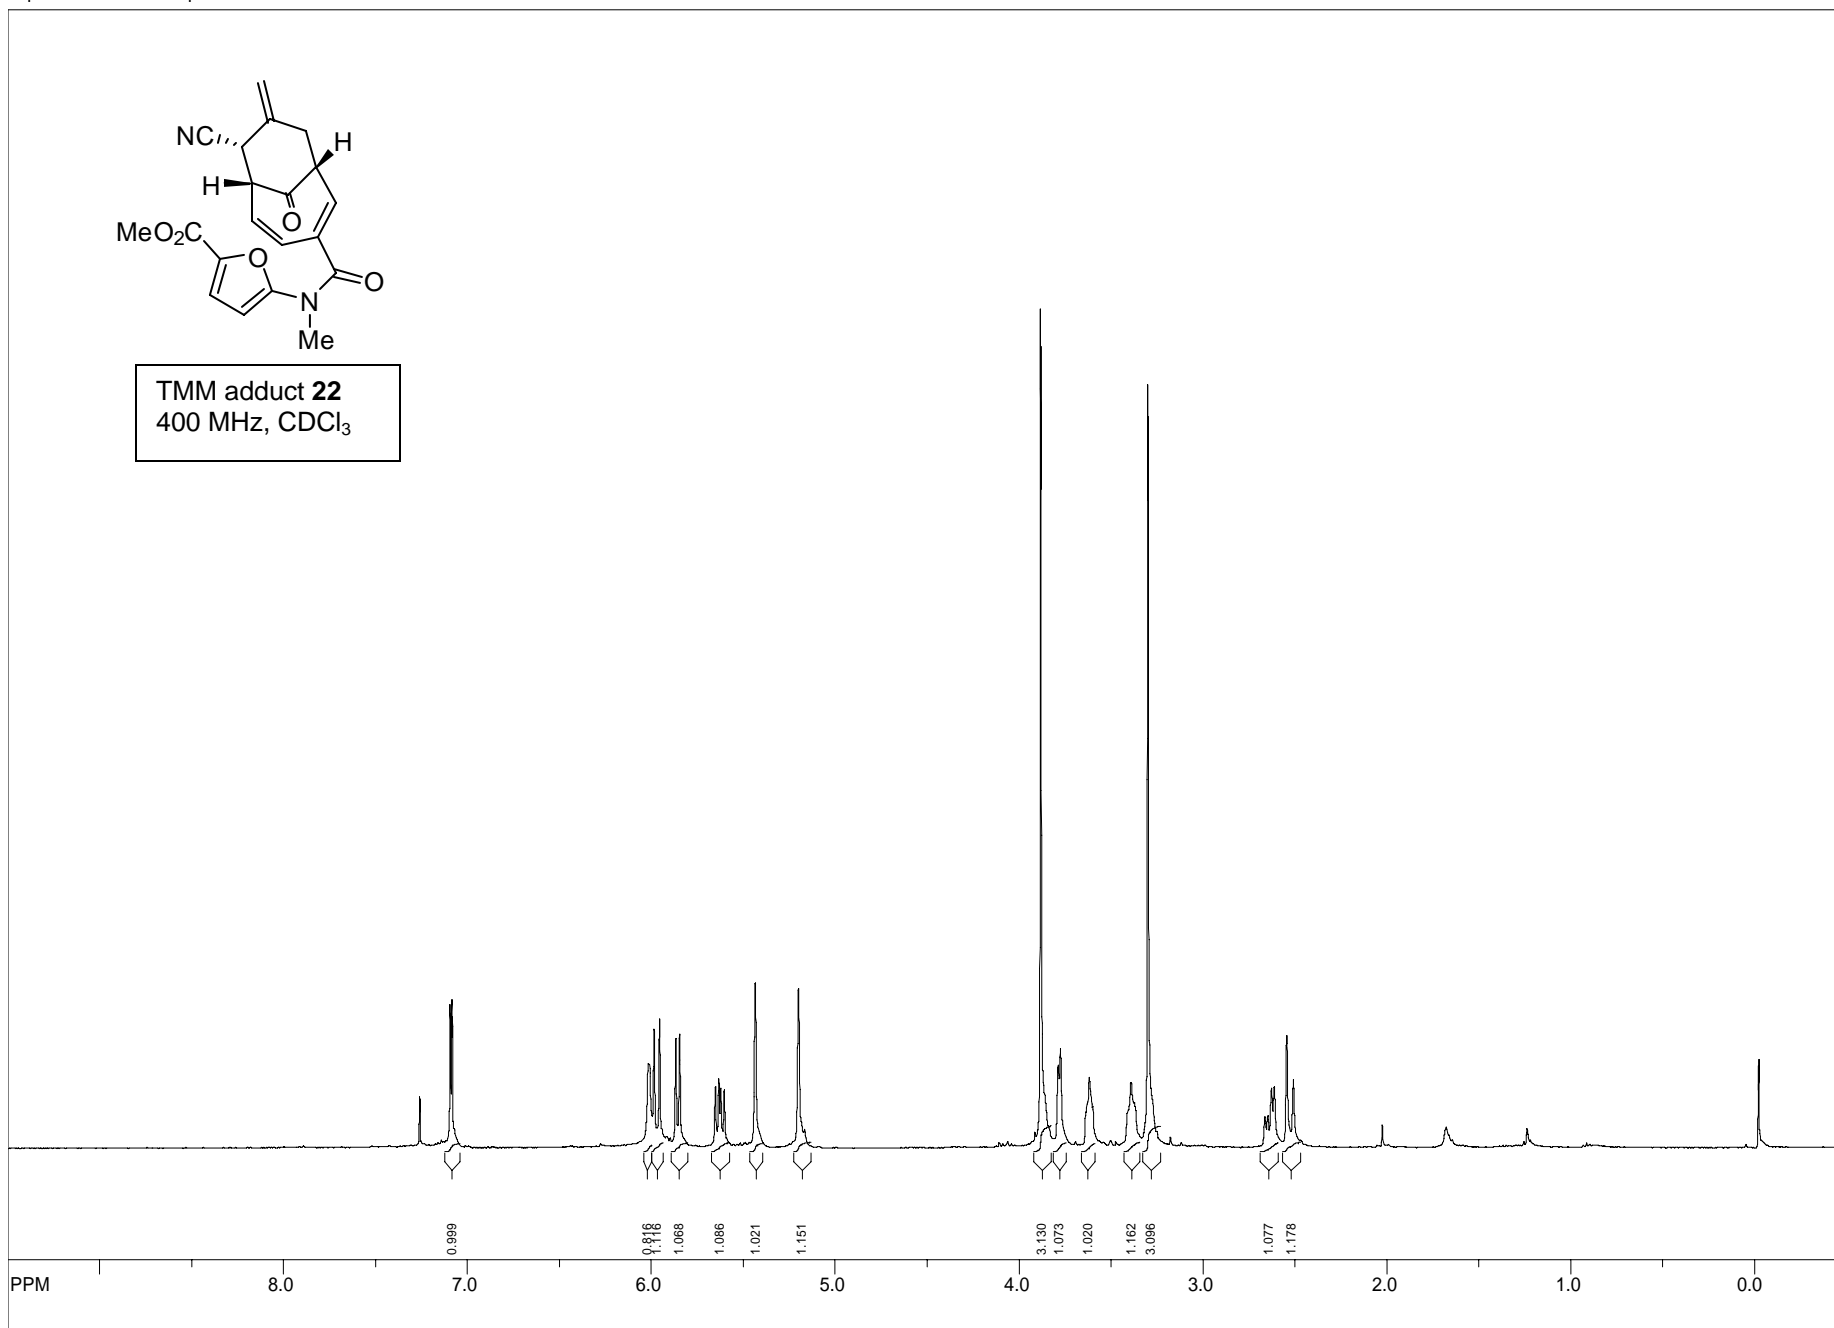

file: C:\Documents and Settings\Patrick\My Documents\PostDoc Chem\NMR data(Book 8)\PJM8-043anal.fid\fid\_block# 1 exp: "s2pu"

freq. of 0 ppm: 399.747385 MHz  
processed size: 65536 complex points  
LB: 0.000 GB: 0.0000



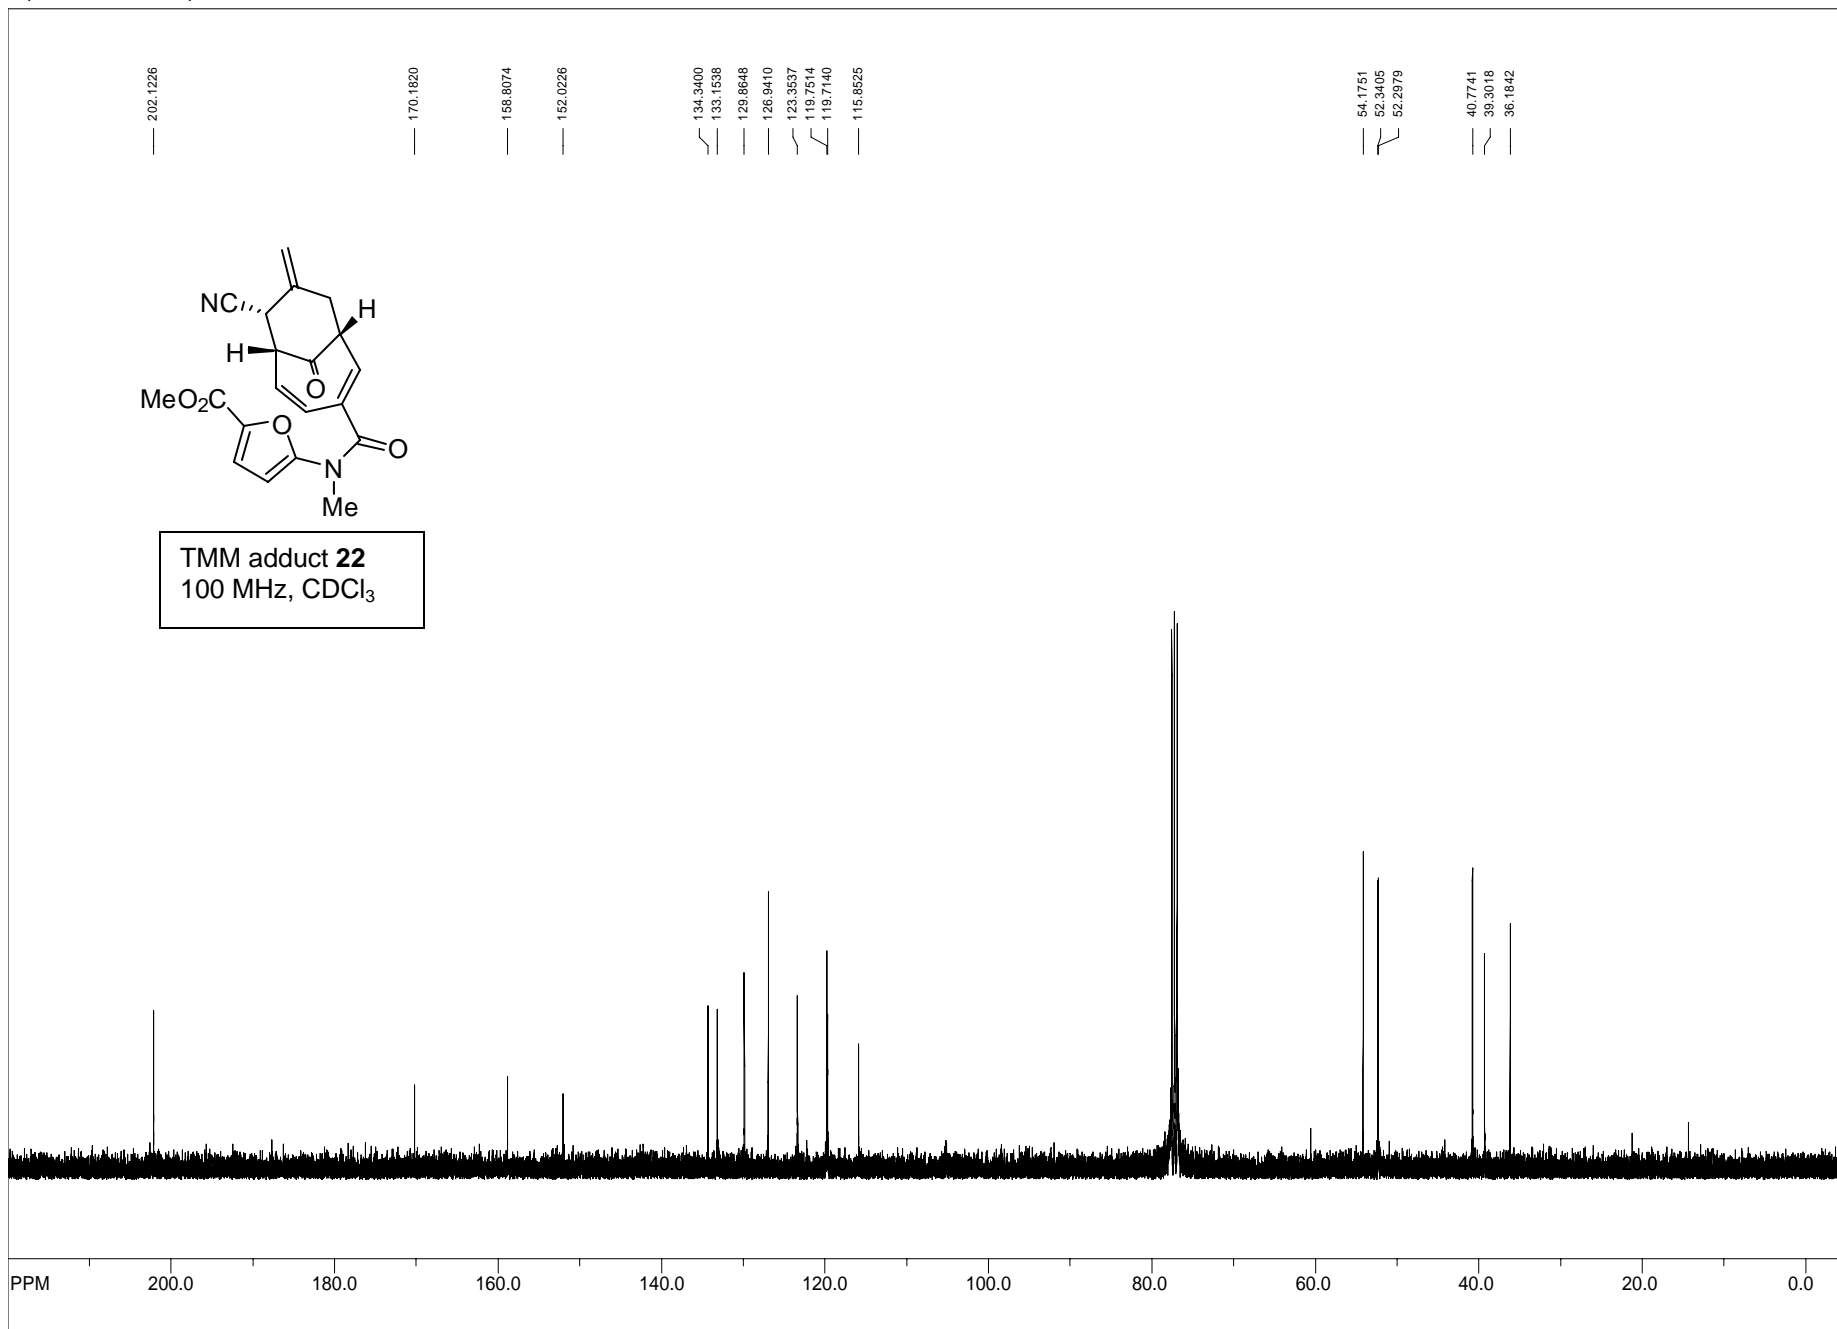

file: C:\Documents and Settings\Patrick\My Documents\PostDoc Chem\NMR data\Book 7\PJM7-085-C13.fid\fid\_block# 1 expt "s2pul"  
transmitter freq.: 100.527090 MHz  
time domain size: 63750 points  
width: 24509.80 Hz = 243.812925 ppm = 0.384468 Hz/pt  
number of scans: 444

freq. of 0 ppm: 100.516539 MHz  
processed size: 65536 complex points  
LB: 0.000 GB: 0.0000

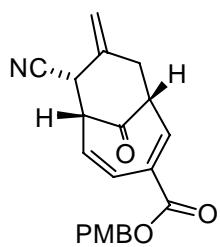

PMB ester adduct **23**  
400 MHz, CDCl<sub>3</sub>

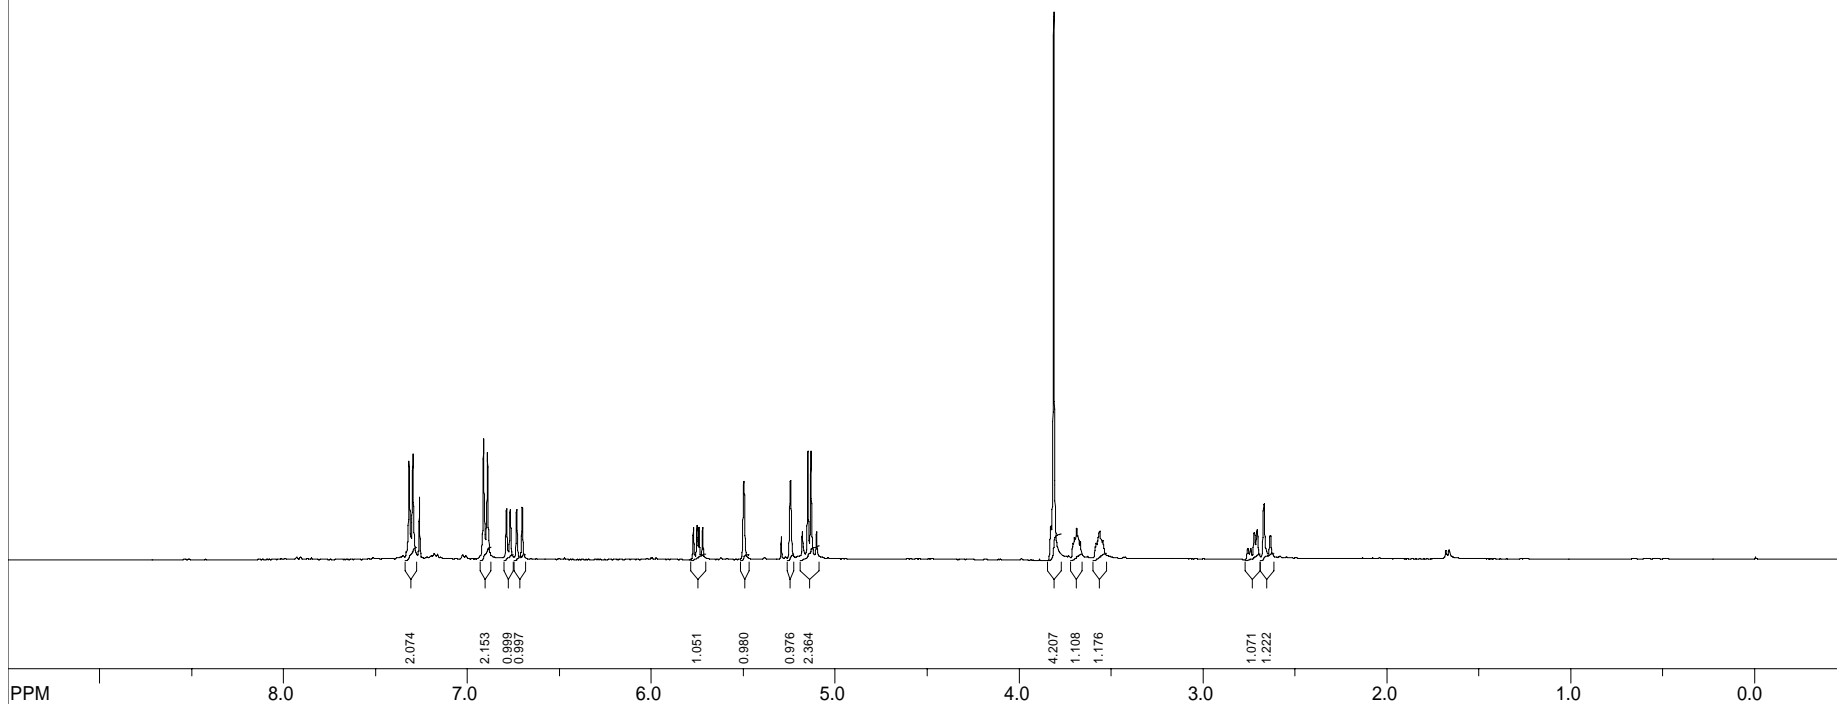

file: C:\Documents and Settings\Patrick\My Documents\PostDoc Chem\NMR data\Book 9\JUM9-052col.fid\fid\_block# 1 expt: "s2pu"  
transmitter freq.: 399.731144 MHz  
time domain size: 44844 points  
width: 5605.38 Hz = 14.022878 ppm = 0.124997 Hz/pt  
number of scans: 16

freq. of 0 ppm: 399.729145 MHz  
processed size: 65536 complex points  
LB: 0.000 GB: 0.0000

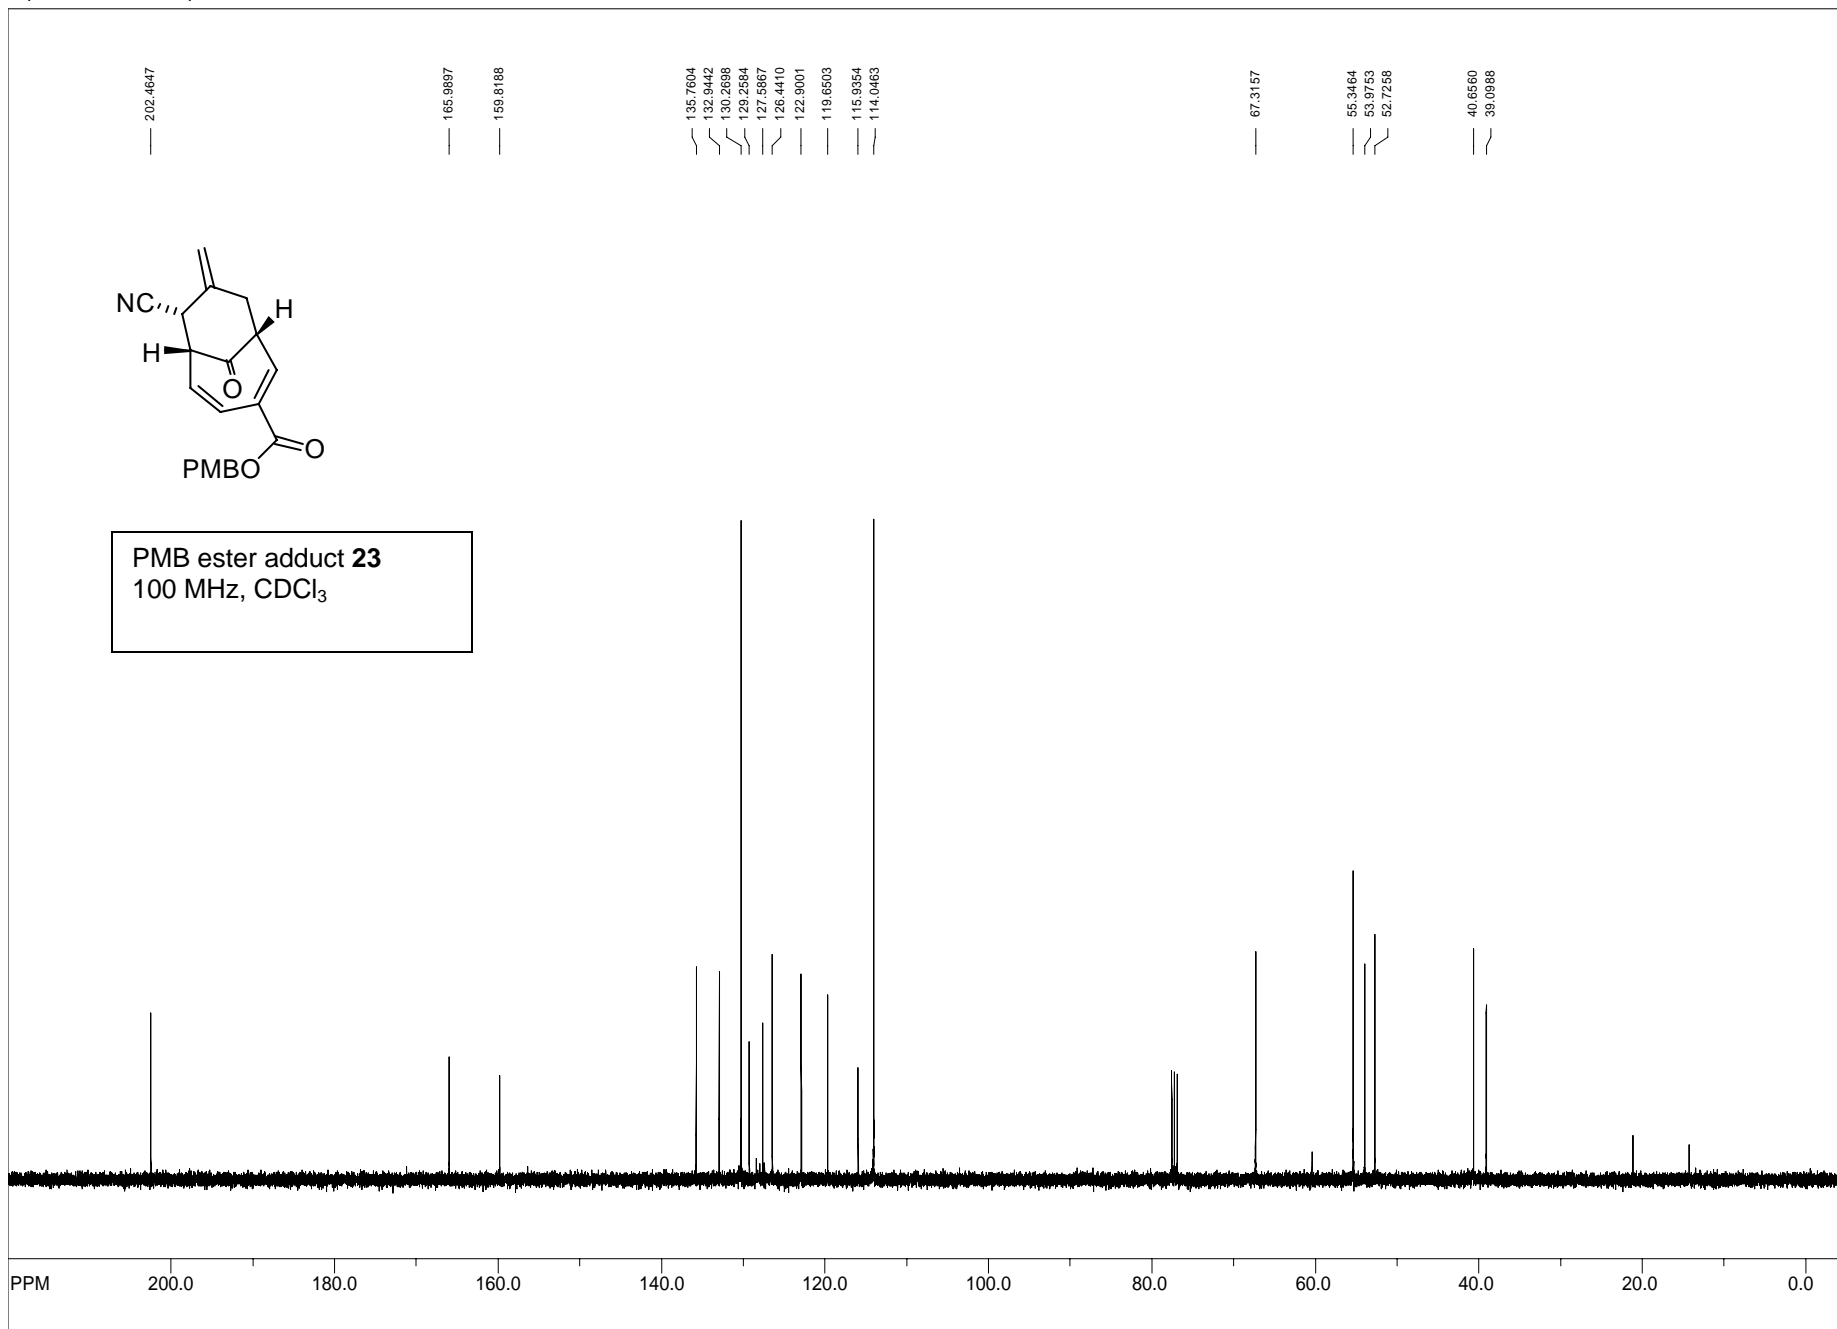

file: C:\Documents and Settings\Patrick\My Documents\PostDoc Chem\NMR data\Book 9\JM9-052C13.fid\fid block# 1 expt: "s2pu"  
transmitter freq.: 100.522503 MHz  
time domain size: 63750 points  
width: 24509.80 Hz = 243.824051 ppm = 0.384468 Hz/pt  
number of scans: 116

freq. of 0 ppm: 100.511969 MHz  
processed size: 65536 complex points  
LB: 0.000 GB: 0.0000

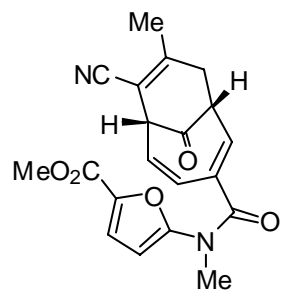

Nitrile 24  
400 MHz, CDCl<sub>3</sub>

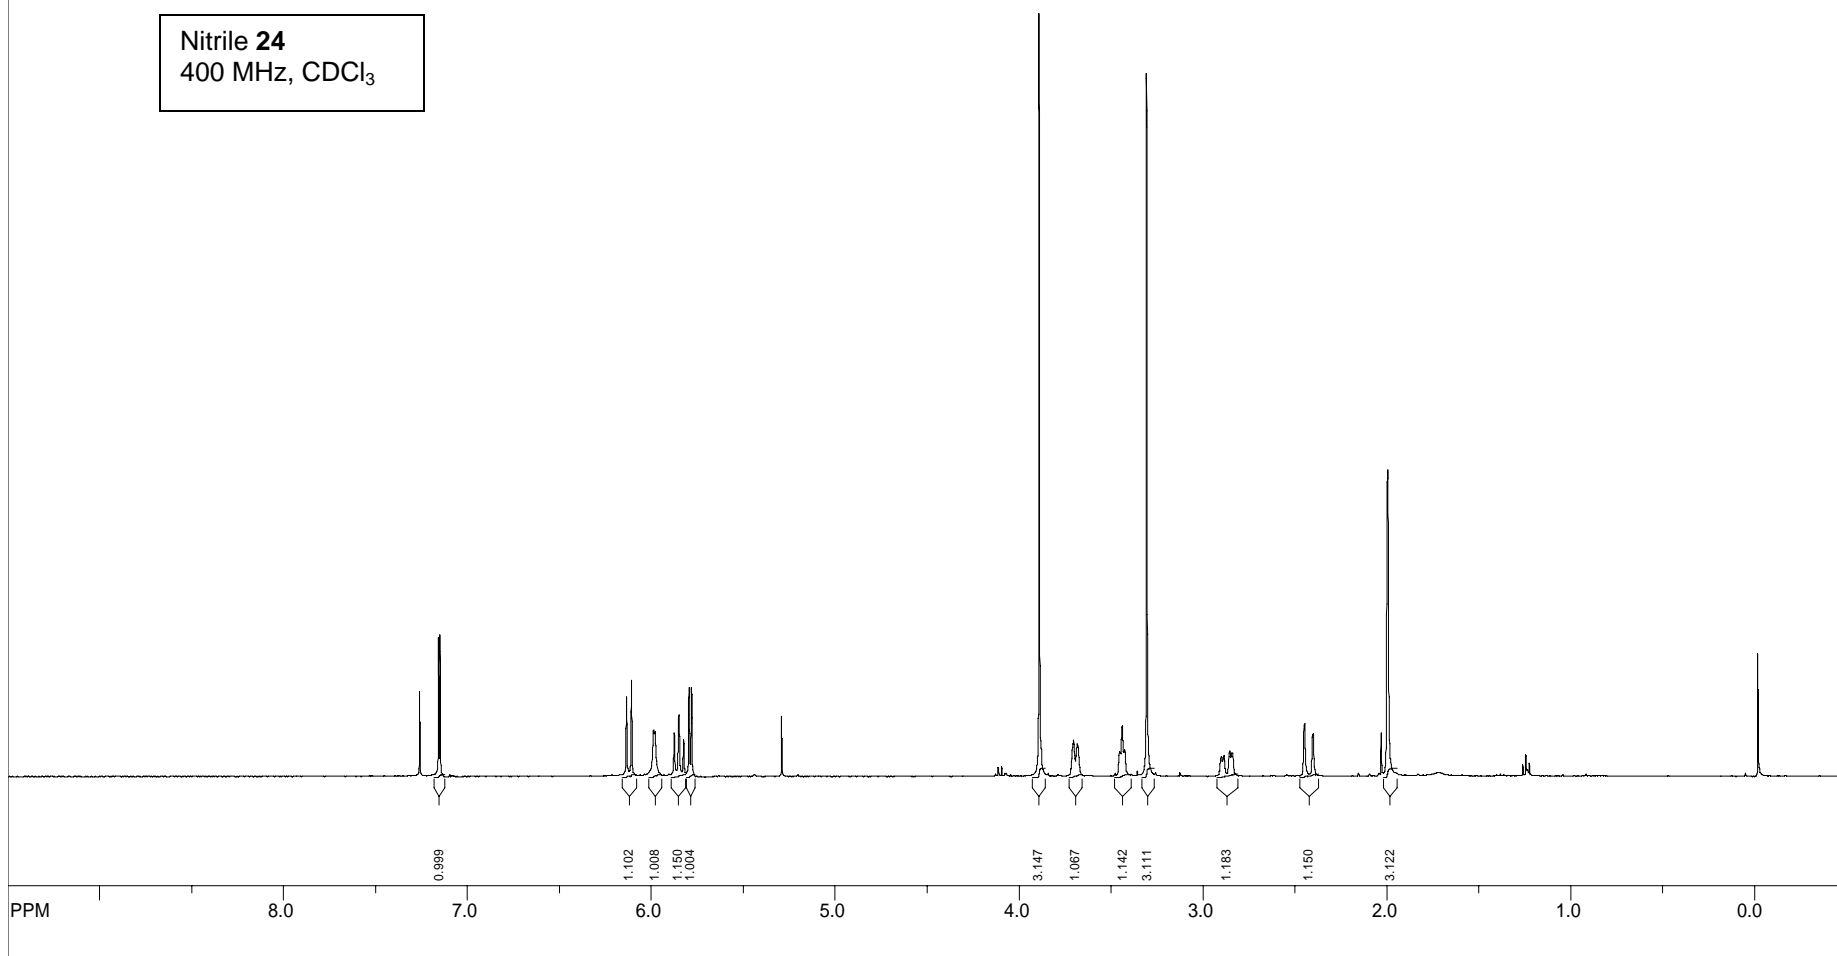

file: C:\Documents and Settings\Patrick\My Documents\PostDoc Chem\NMR data\Book 8\PM8-064col.fid\fid block# 1 expt: "s2pu"  
transmitter freq.: 399.749384 MHz  
time domain size: 44844 points  
width: 5605.38 Hz = 14.022238 ppm = 0.124997 Hz/pt  
number of scans: 4

freq. of 0 ppm: 399.747386 MHz  
processed size: 65536 complex points  
LB: 0.000 GB: 0.0000

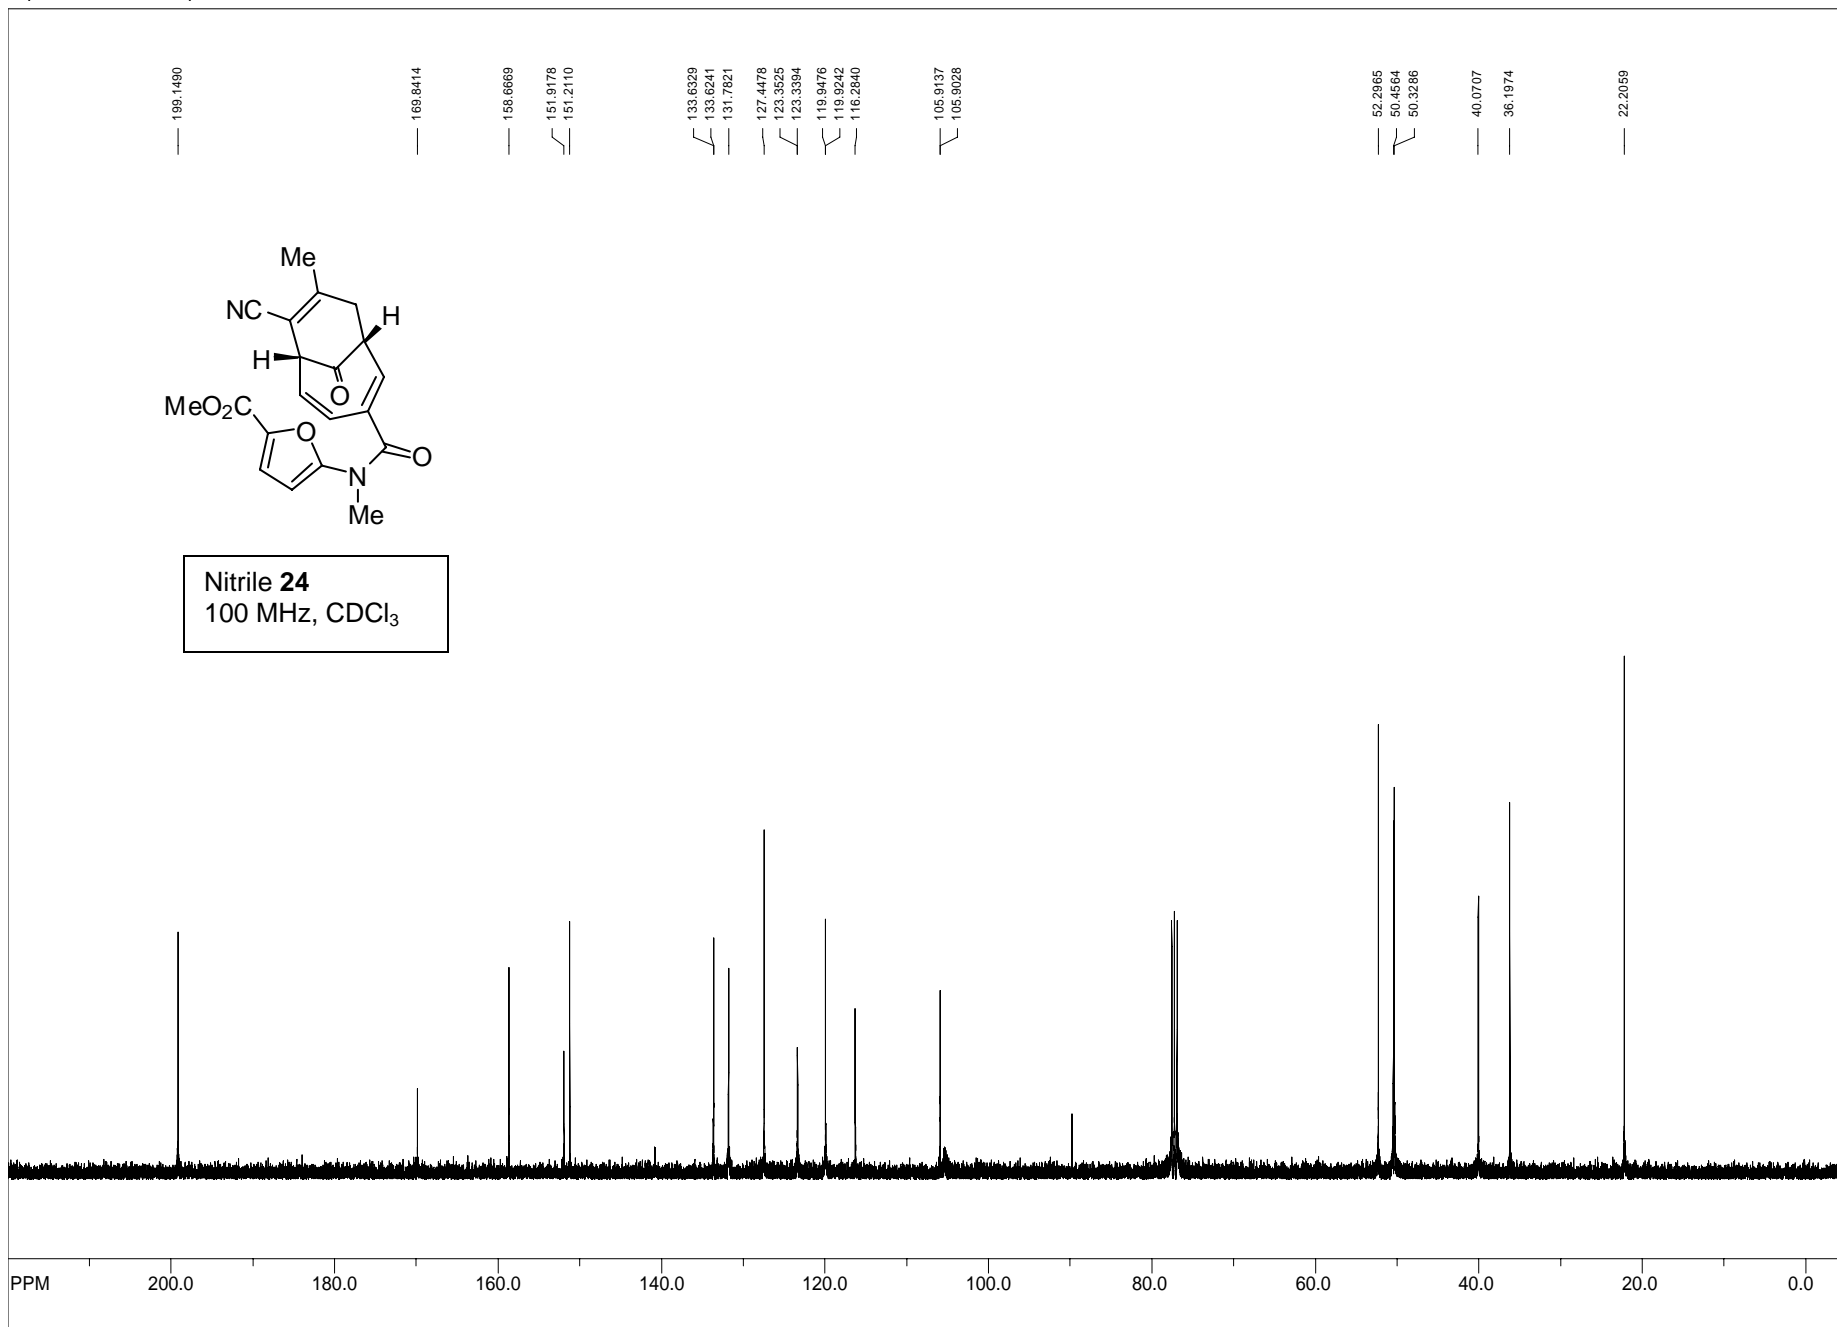

file: C:\Documents and Settings\Patrick\My Documents\PostDoc Chem\NMR data\Book 8\PM8-064C13.fid\fid\_block# 1 expt: "s2pu"  
transmitter freq.: 100.527090 MHz  
time domain size: 63750 points  
width: 24509.80 Hz = 243.812925 ppm = 0.384468 Hz/pt  
number of scans: 164

freq. of 0 ppm: 100.516548 MHz  
processed size: 65536 complex points  
LB: 0.000 GB: 0.0000

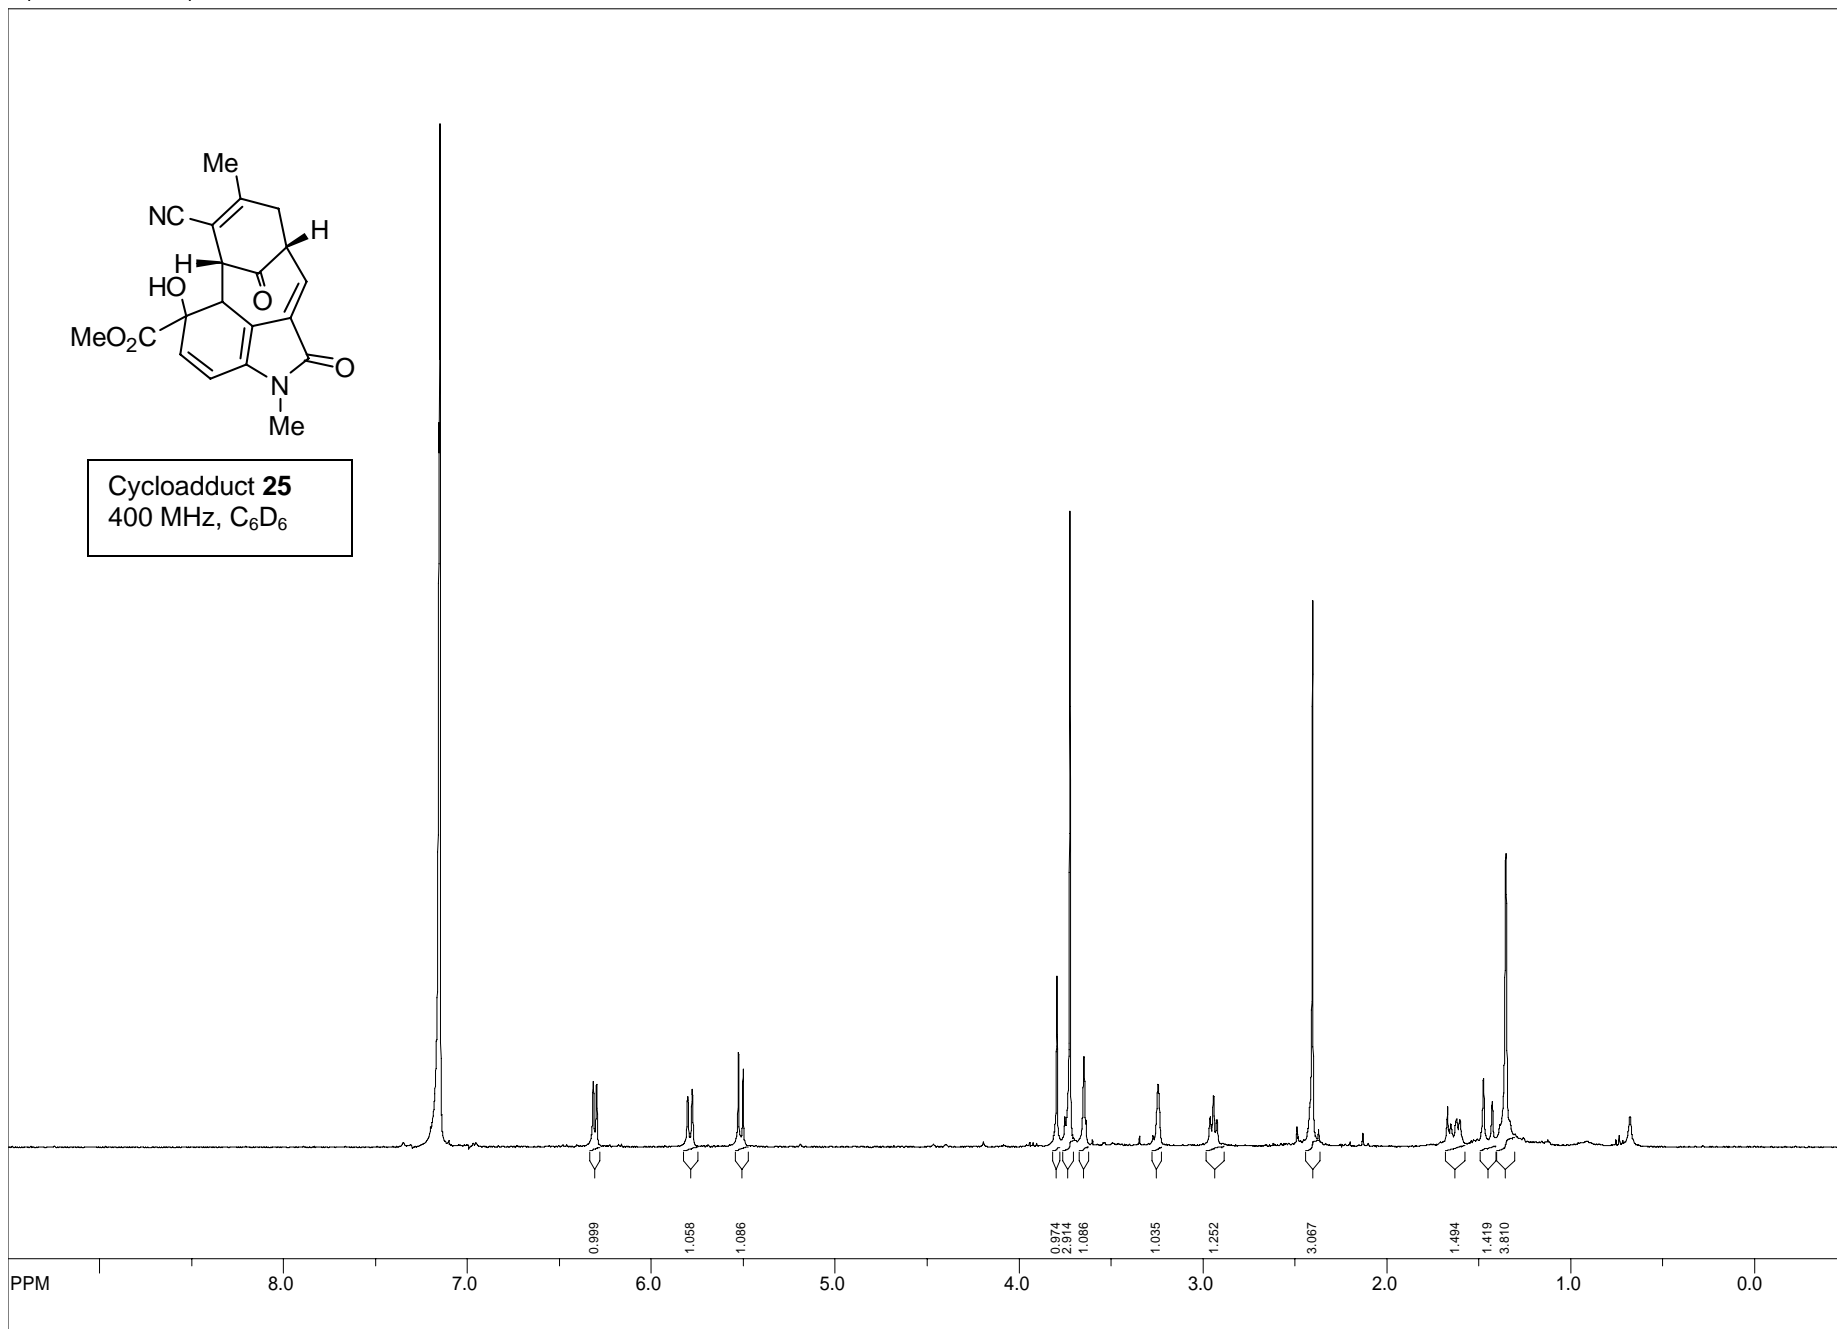

file: C:\Documents and Settings\Patrick\My Documents\PostDoc Chem\NMR data\Book 8\PM8-006column.fid\fid block# 1 expt: "s2pu"  
transmitter freq.: 399.749420 MHz  
time domain size: 44844 points  
width: 5605.38 Hz = 14.022237 ppm = 0.124997 Hz/pt  
number of scans: 8

freq. of 0 ppm: 399.747406 MHz  
processed size: 65536 complex points  
LB: 0.000 GB: 0.0000

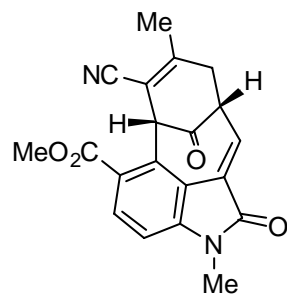

Oxindole **26**  
400 MHz, CDCl<sub>3</sub>

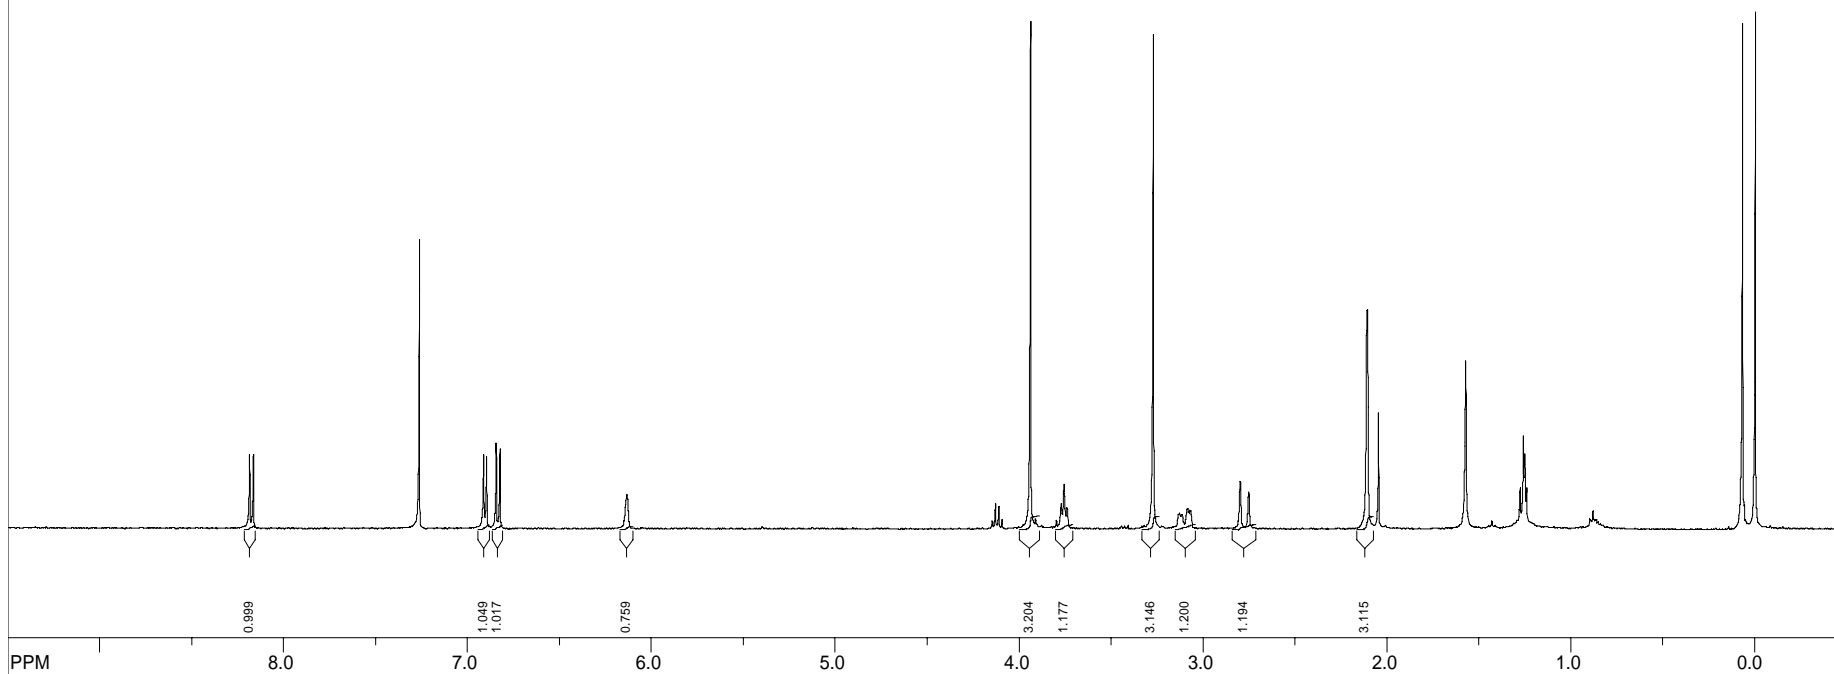

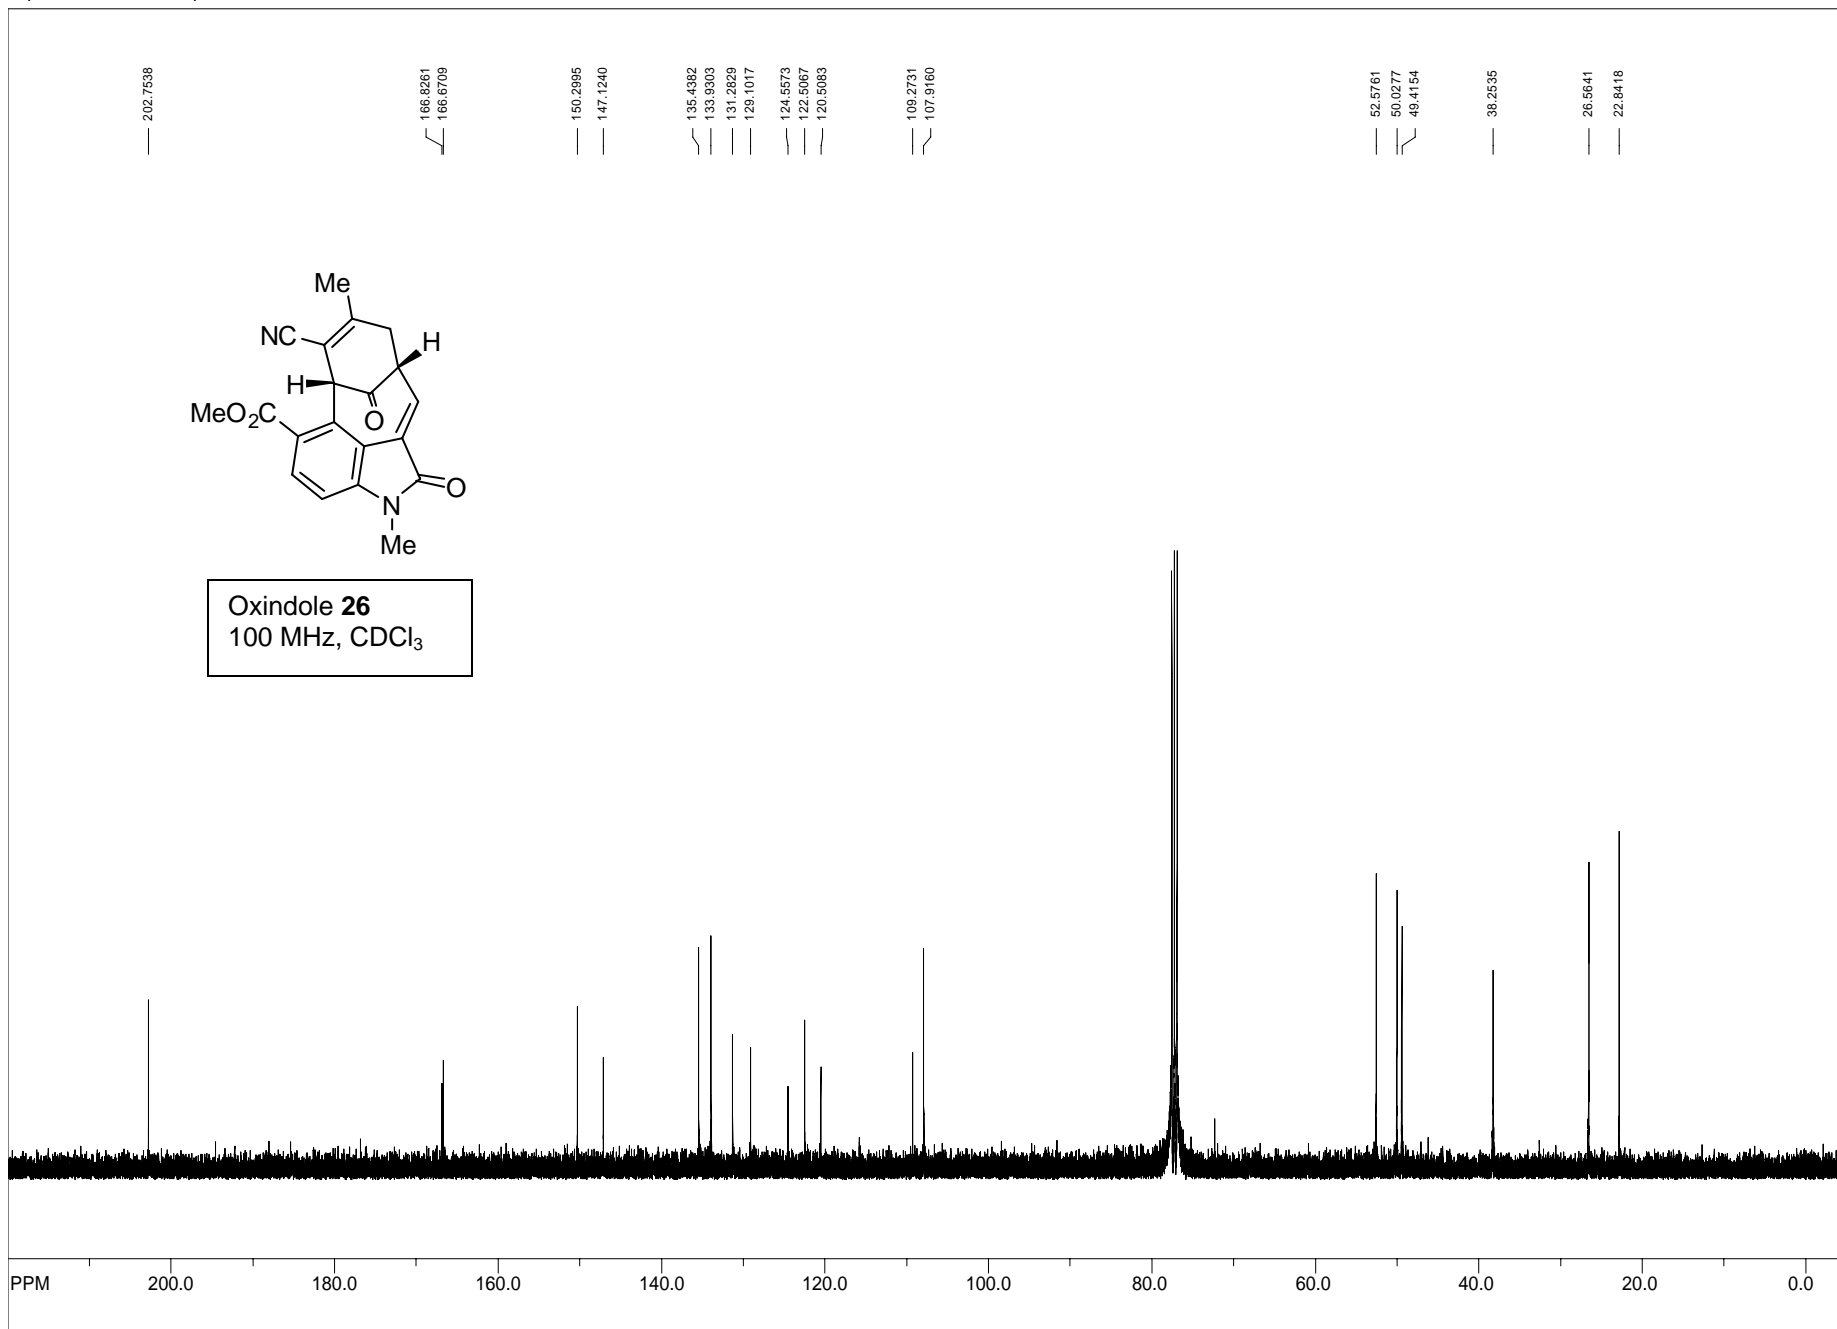

file: C:\Documents and Settings\Patrick\My Documents\PostDoc Chem\NMR data\Book 9\PM9-011C13.fid\fid block# 1 expt: "s2pu"  
transmitter freq.: 100.522503 MHz  
time domain size: 63750 points  
width: 24509.80 Hz = 243.824051 ppm = 0.384468 Hz/pt  
number of scans: 512

freq. of 0 ppm: 100.511953 MHz  
processed size: 65536 complex points  
LB: 0.000 GB: 0.0000



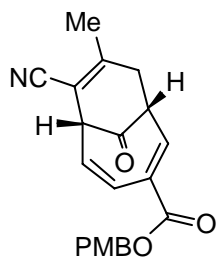

$\alpha$ ,  $\beta$ -unsaturated nitrile **27**  
400 MHz, CDCl<sub>3</sub>

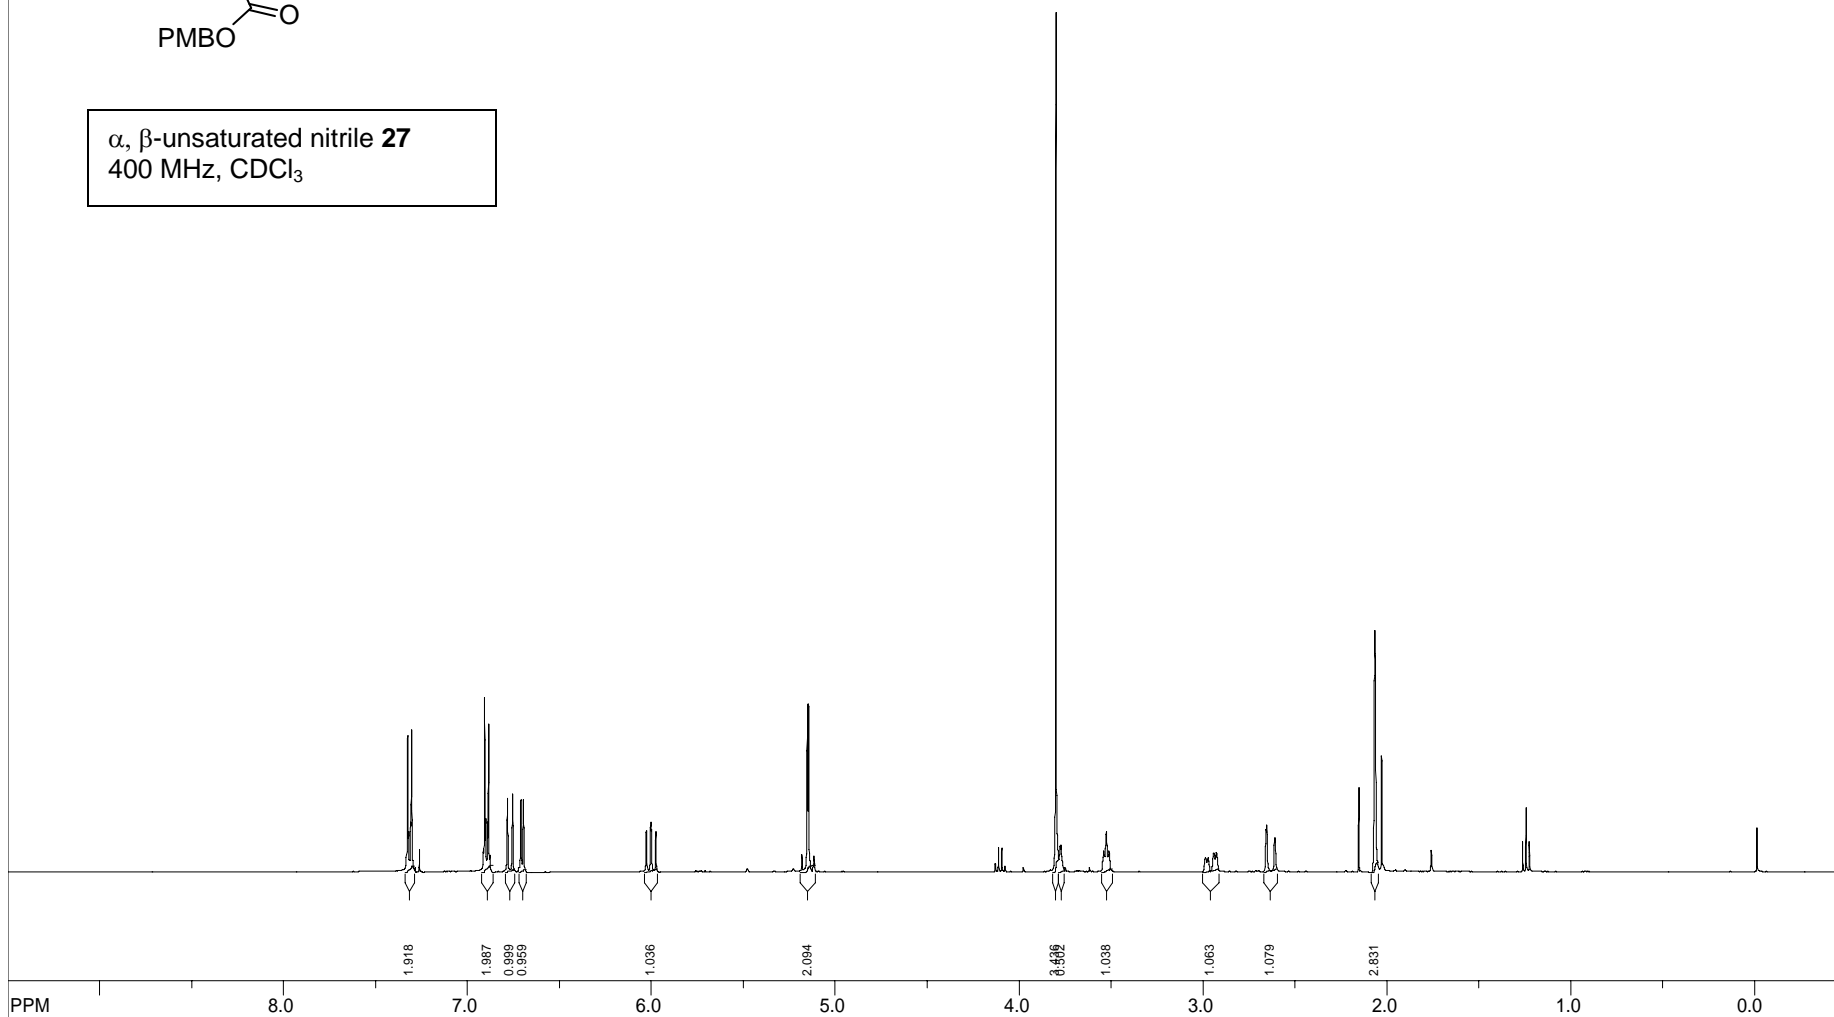

file: C:\Documents and Settings\Patrick\My Documents\PostDoc Chem\NMR data\Book 10\PJM10-003anal.fid\fid\_block# 1 expt: \*s2pu\*  
transmitter freq.: 399.731144 MHz  
time domain size: 44844 points  
width: 5605.38 Hz = 14.022878 ppm = 0.124997 Hz/pt  
number of scans: 8

freq. of 0 ppm: 399.729144 MHz  
processed size: 65536 complex points  
LB: 0.000 GB: 0.0000

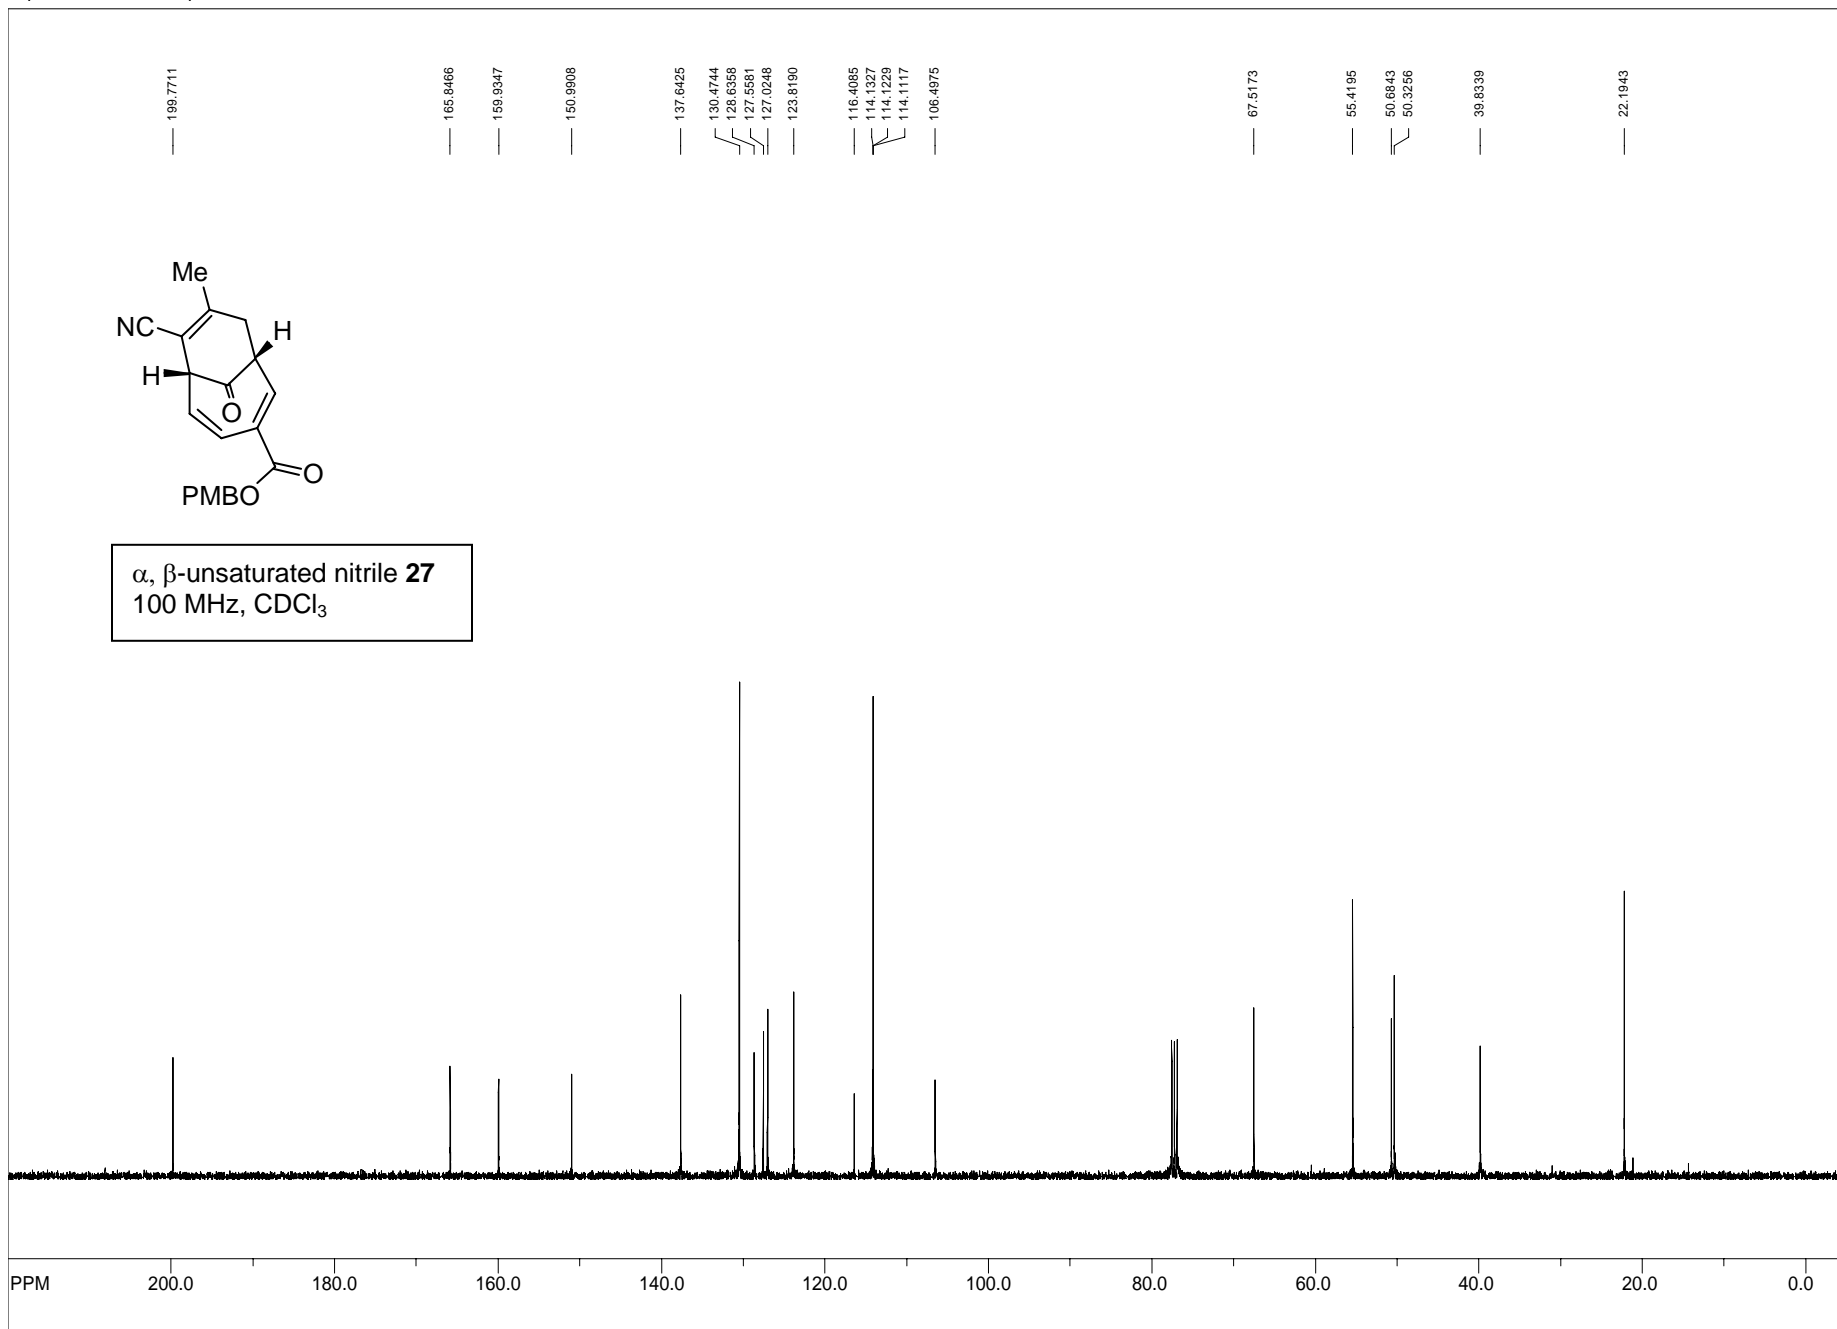

file: C:\Documents and Settings\Patrick\My Documents\PostDoc Chem\NMR data\Book 10\PJM10-003-13C.fid\fid block# 1 exp: "s2pul"  
transmitter freq.: 100.522503 MHz  
time domain size: 63750 points  
width: 24509.80 Hz = 243.824051 ppm = 0.384468 Hz/pt  
number of scans: 116

freq. of 0 ppm: 100.511962 MHz  
processed size: 65536 complex points  
LB: 0.000 GB: 0.0000

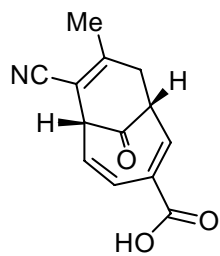

Carboxylic acid **28**  
400 MHz, CDCl<sub>3</sub>

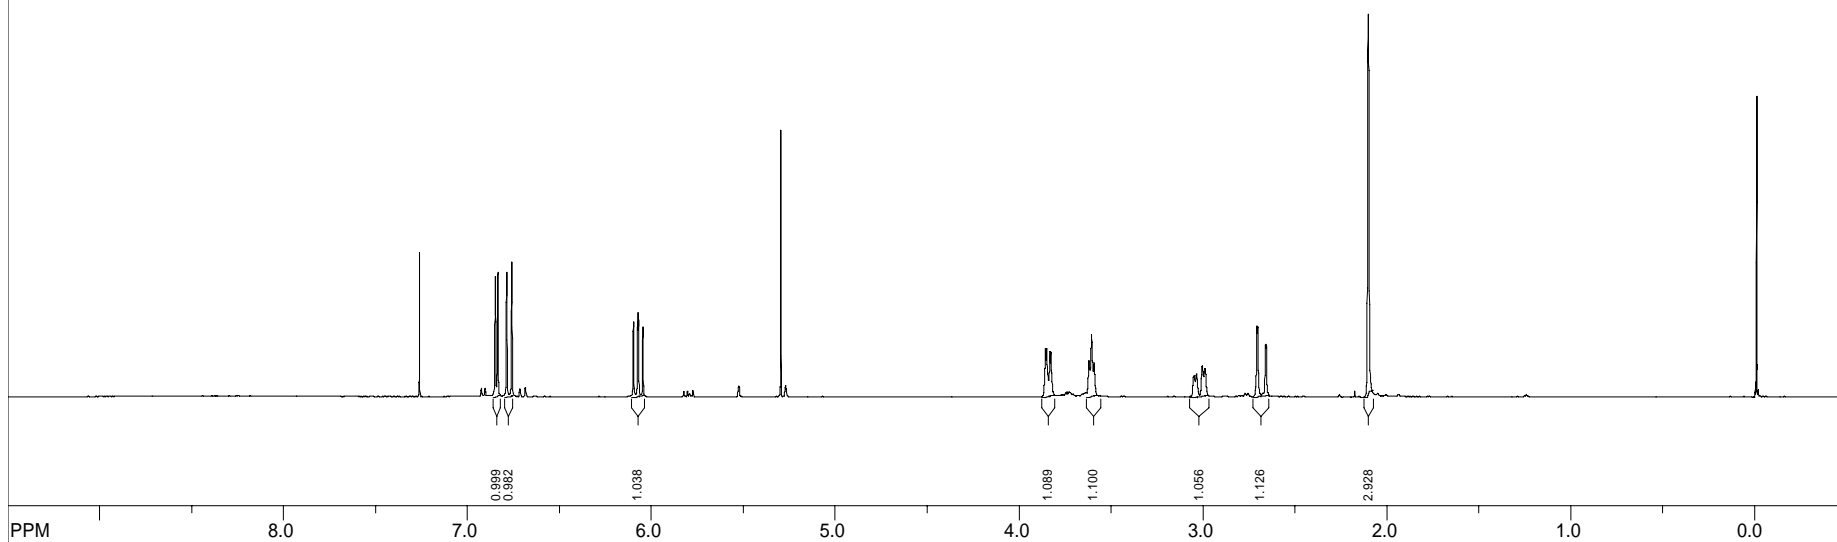

file: C:\Documents and Settings\Patrick\My Documents\PostDoc Chem\NMR data\Book 10\PJM10-005col.fid\fid\_block# 1 exp: "s2pul"  
transmitter freq.: 399.731144 MHz  
time domain size: 44844 points  
width: 5605.38 Hz = 14.022878 ppm = 0.124997 Hz/pt  
number of scans: 8

freq. of 0 ppm: 399.729145 MHz  
processed size: 65536 complex points  
LB: 0.000 GB: 0.0000

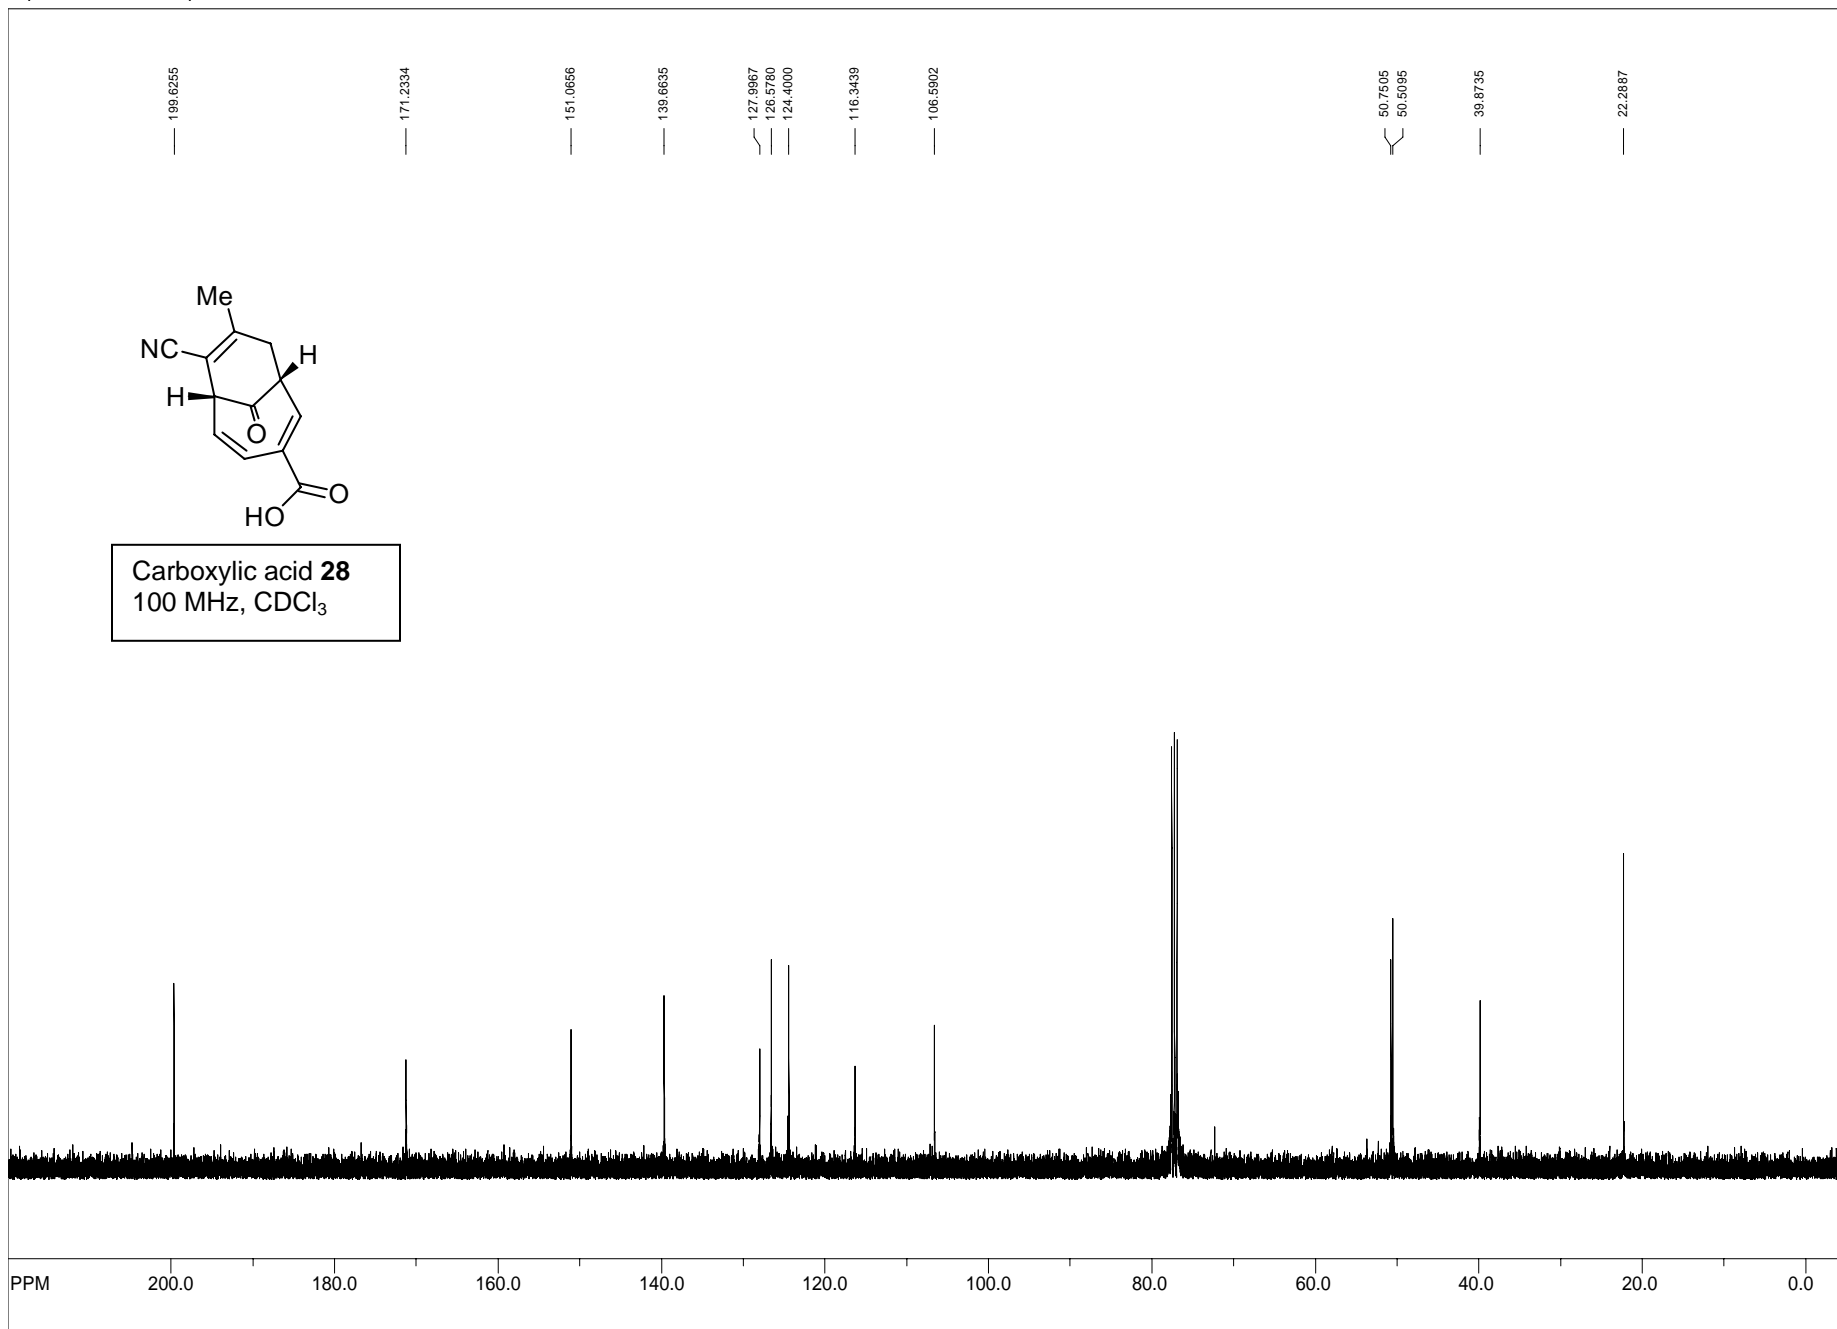

file: C:\Documents and Settings\Patrick\My Documents\PostDoc Chem\NMR data\Book 9\PM9-023C13.fid\fid\_block# 1 expt: "s2pu"  
transmitter freq.: 100.522503 MHz  
time domain size: 63750 points  
width: 24509.80 Hz = 243.824051 ppm = 0.384468 Hz/pt  
number of scans: 196

freq. of 0 ppm: 100.511954 MHz  
processed size: 65536 complex points  
LB: 0.000 GB: 0.0000

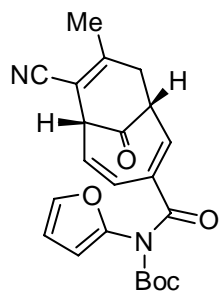

Imidofuran **30**  
400 MHz, CDCl<sub>3</sub>

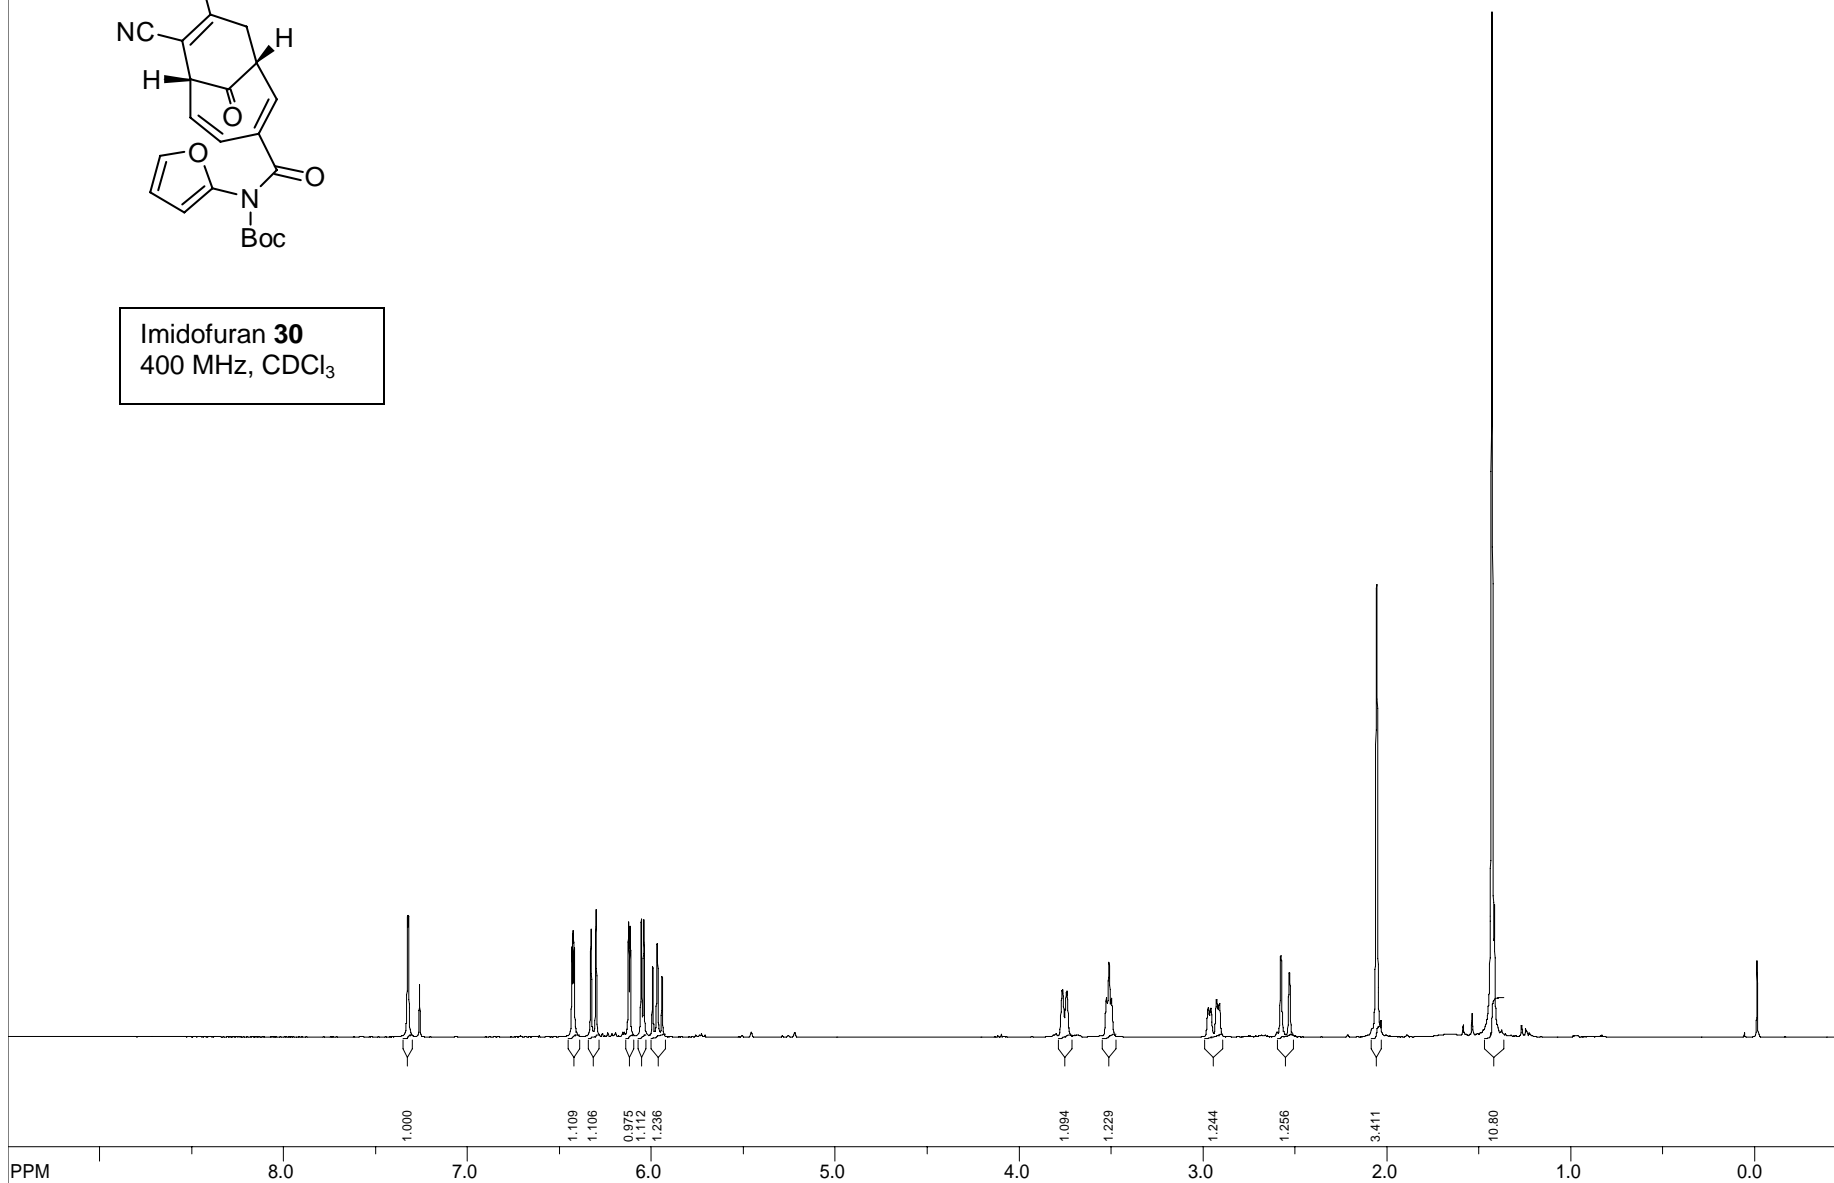

file: C:\Documents and Settings\Patrick\My Documents\PostDoc Chem\NMR data\Book 10\PJM10-012anal.fid\fid\_block# 1 expt: \*s2pu\*  
transmitter freq.: 400.113556 MHz  
time domain size: 40000 points  
width: 4997.50 Hz = 12.490207 ppm = 0.124938 Hz/pt  
number of scans: 16

freq. of 0 ppm: 400.111537 MHz  
processed size: 65536 complex points  
LB: 0.000 GB: 0.0000

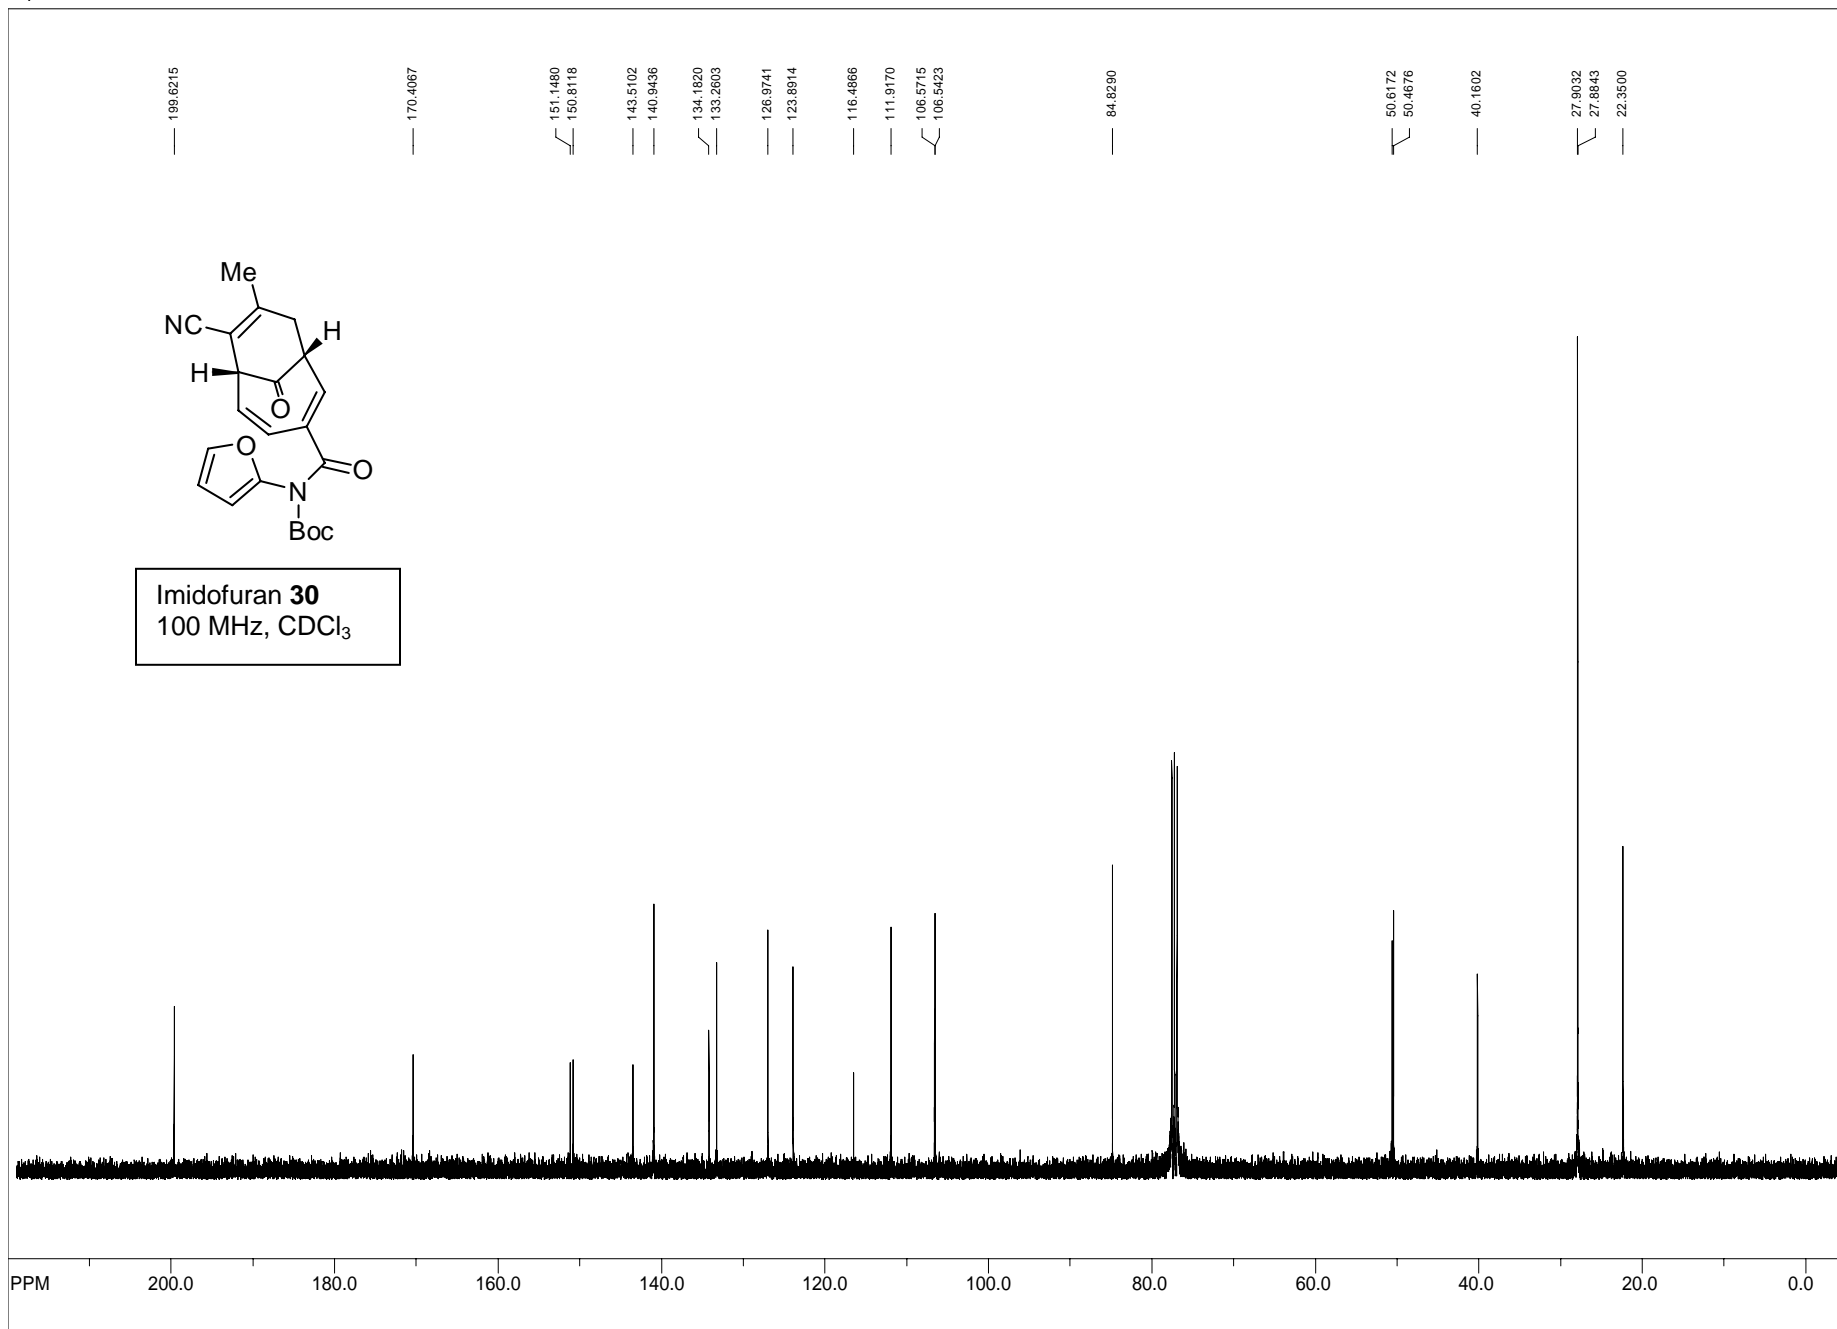

file: C:\Documents and Settings\Patrick\My Documents\PostDoc Chem\NMR data\Book 10\PJM10-012C13.fid\fid\_block# 1 exp: \*s2puf  
transmitter freq.: 100.617627 MHz  
time domain size: 59968 points  
width: 25000.00 Hz = 248.465411 ppm = 0.416889 Hz/pt  
number of scans: 608

freq. of 0 ppm: 100.608107 MHz  
processed size: 65536 complex points  
LB: 0.000 GB: 0.0000

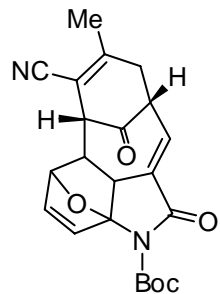

Diels-Alder adduct **31**  
400 MHz, CDCl<sub>3</sub>

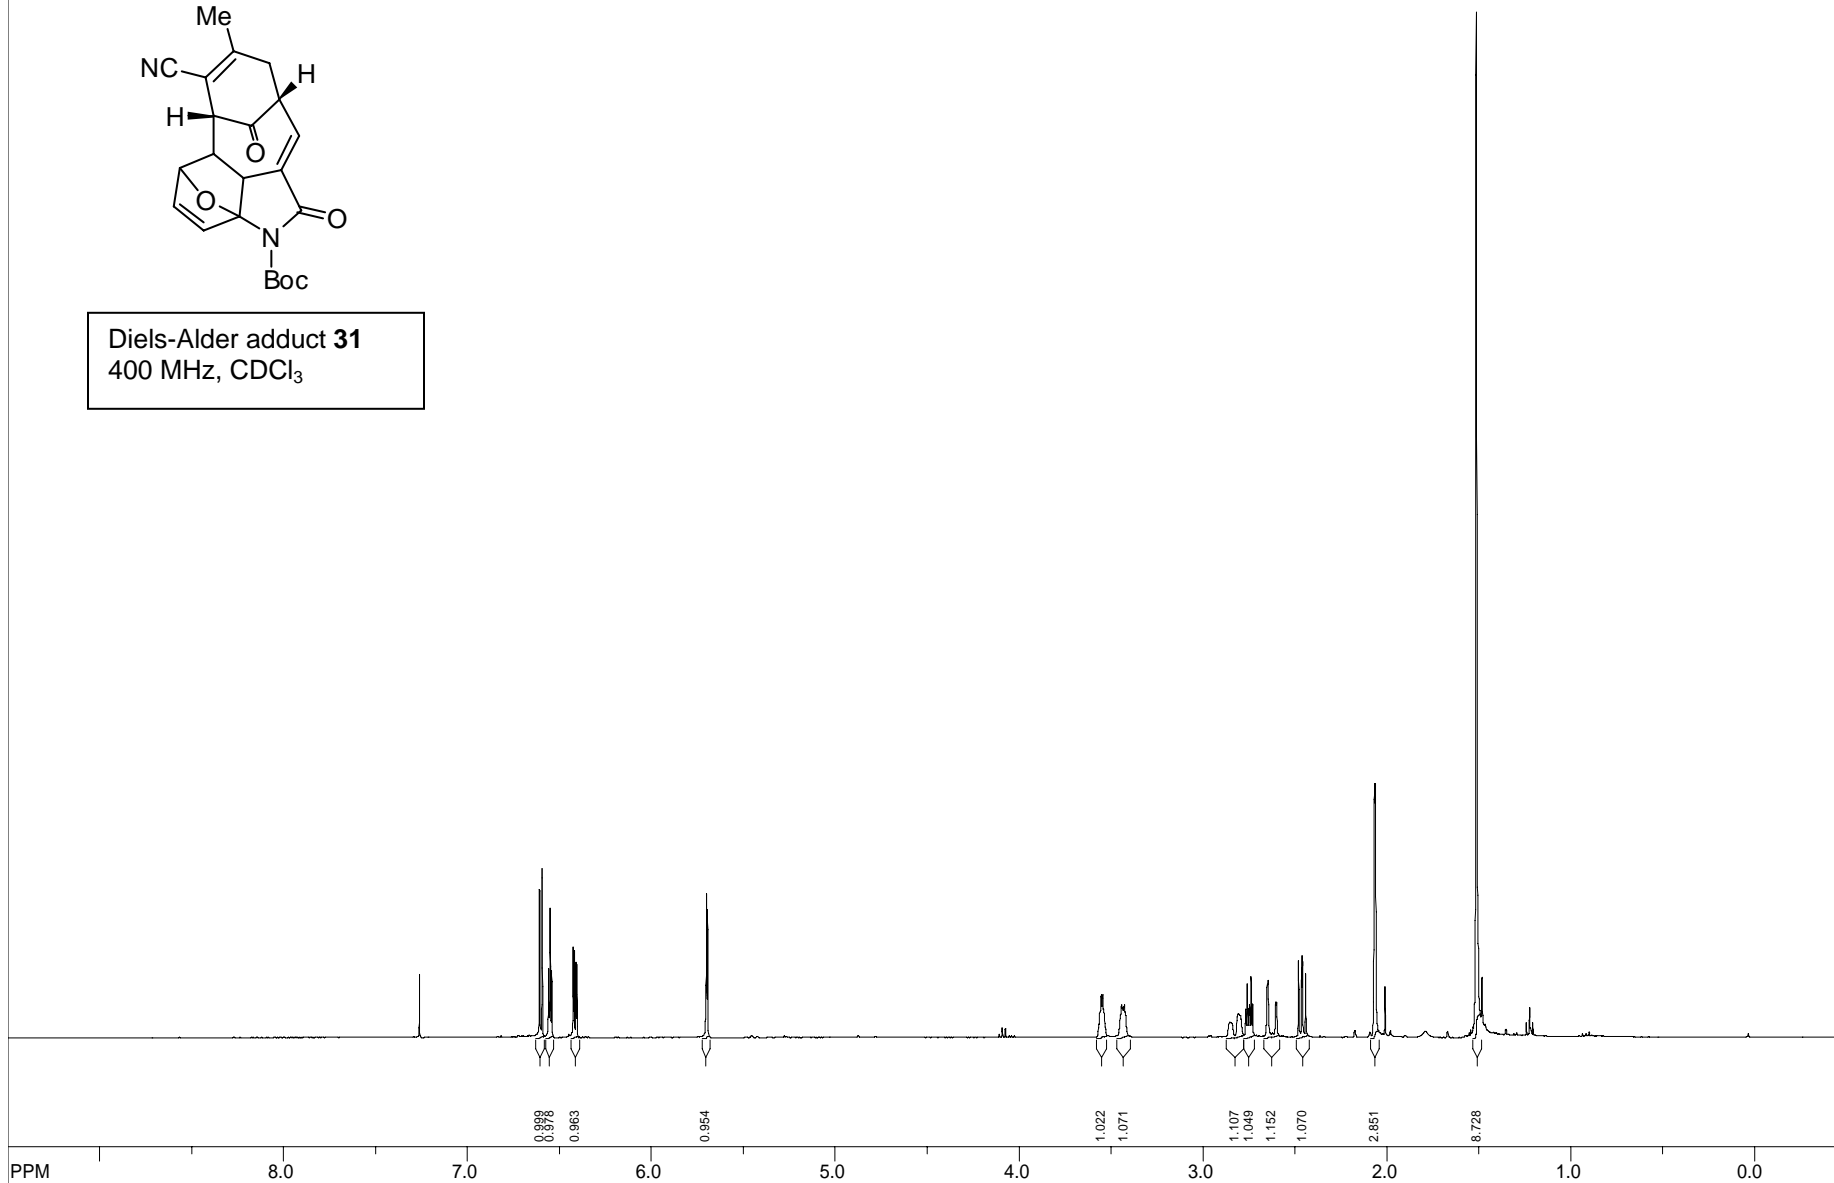

file: C:\Documents and Settings\Patrick\My Documents\PostDoc Chem\NMR data\Book 9\JM9-044anal.fid\fid\_block# 1 expt: "s2pu"

freq. of 0 ppm: 399.729144 MHz  
transmitter freq.: 399.731144 MHz  
processed size: 65536 complex points  
time domain size: 44844 points  
LB: 0.000 GB: 0.0000

width: 5605.38 Hz = 14.022878 ppm = 0.124997 Hz/pt  
number of scans: 8

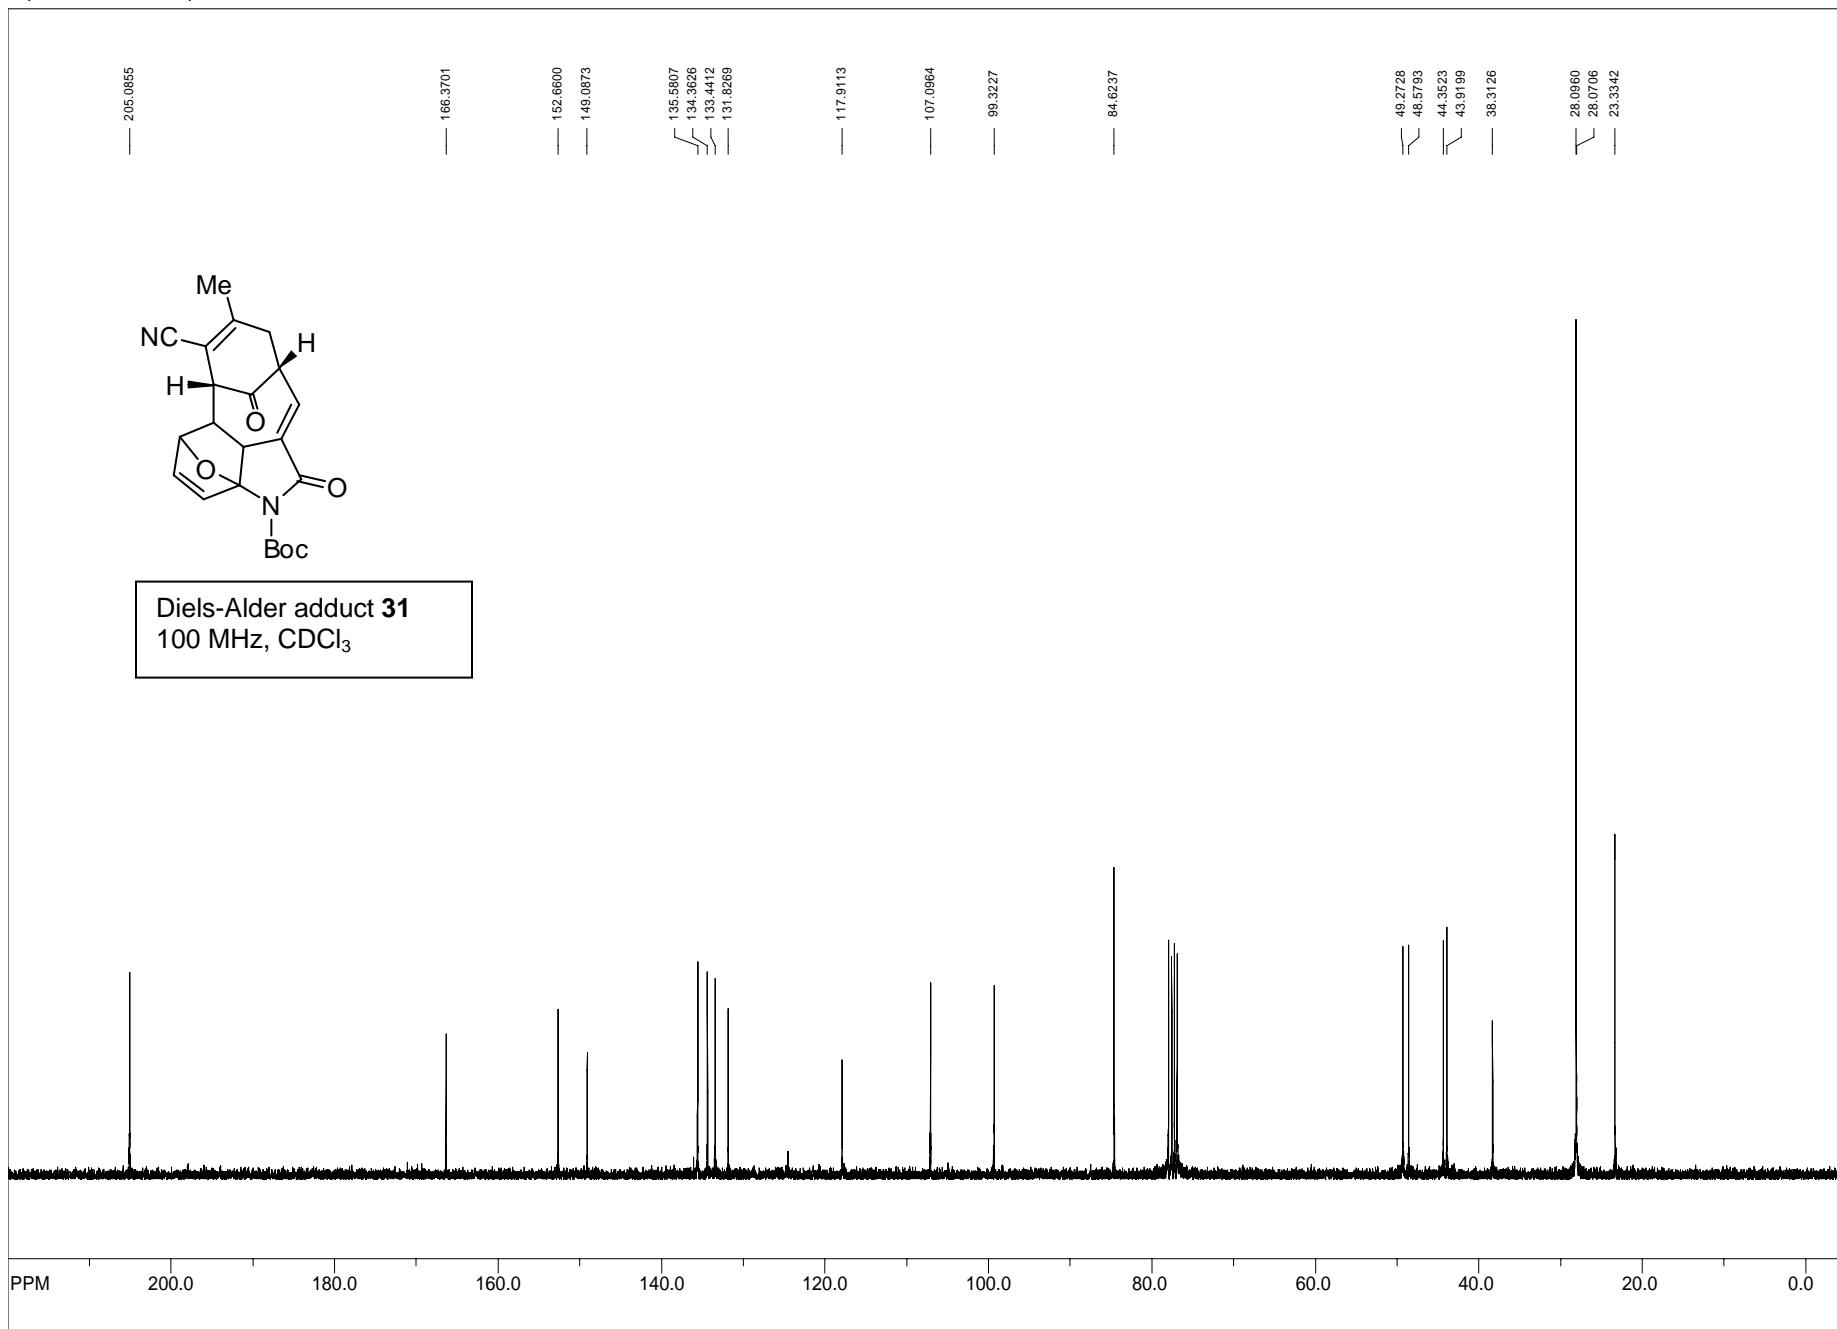

file: C:\Documents and Settings\Patrick\My Documents\PostDoc Chem\NMR data\Book 9\PJMG-044C13.fid\fid\_block# 1 expt: "s2pu"  
transmitter freq.: 100.522503 MHz  
time domain size: 63750 points  
width: 24509.80 Hz = 243.824051 ppm = 0.384468 Hz/pt  
number of scans: 128

freq. of 0 ppm: 100.511960 MHz  
processed size: 65536 complex points  
LB: 0.000 GB: 0.0000



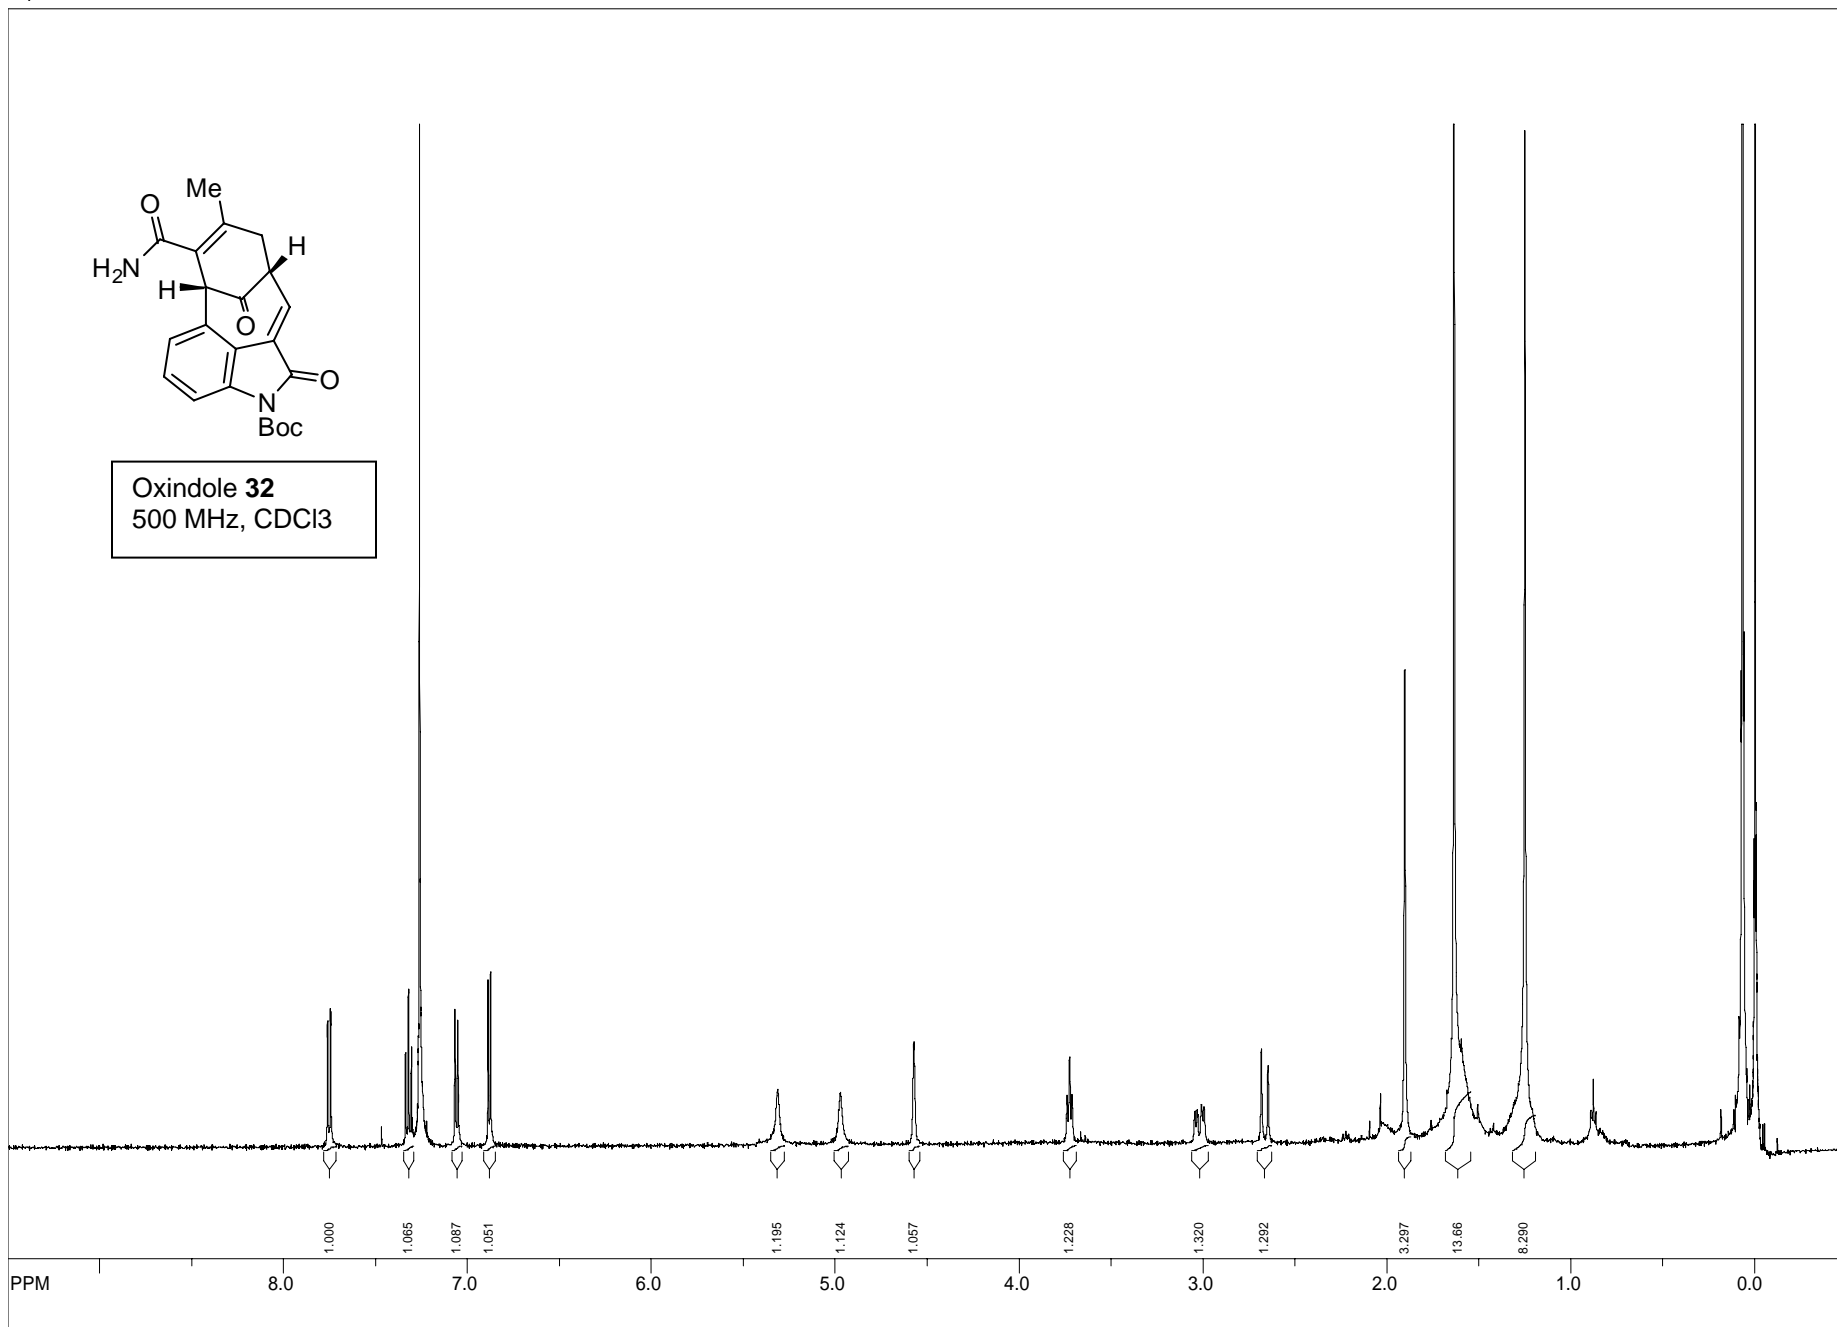

file: C:\Documents and Settings\Patrick\My Documents\PostDoc Chem\NMR data\Book 9\PM9-036.2.fid\fid\_block# 1 expt: "s2pul"  
transmitter freq.: 499.751060 MHz  
time domain size: 64000 points  
width: 8000.00 Hz = 16.007970 ppm = 0.125000 Hz/pt  
number of scans: 84

freq. of 0 ppm: 499.748574 MHz  
processed size: 131072 complex points  
LB: 0.000 GB: 0.0000

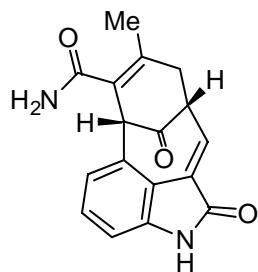

Oxindole **33**  
400 MHz, CD<sub>3</sub>CN

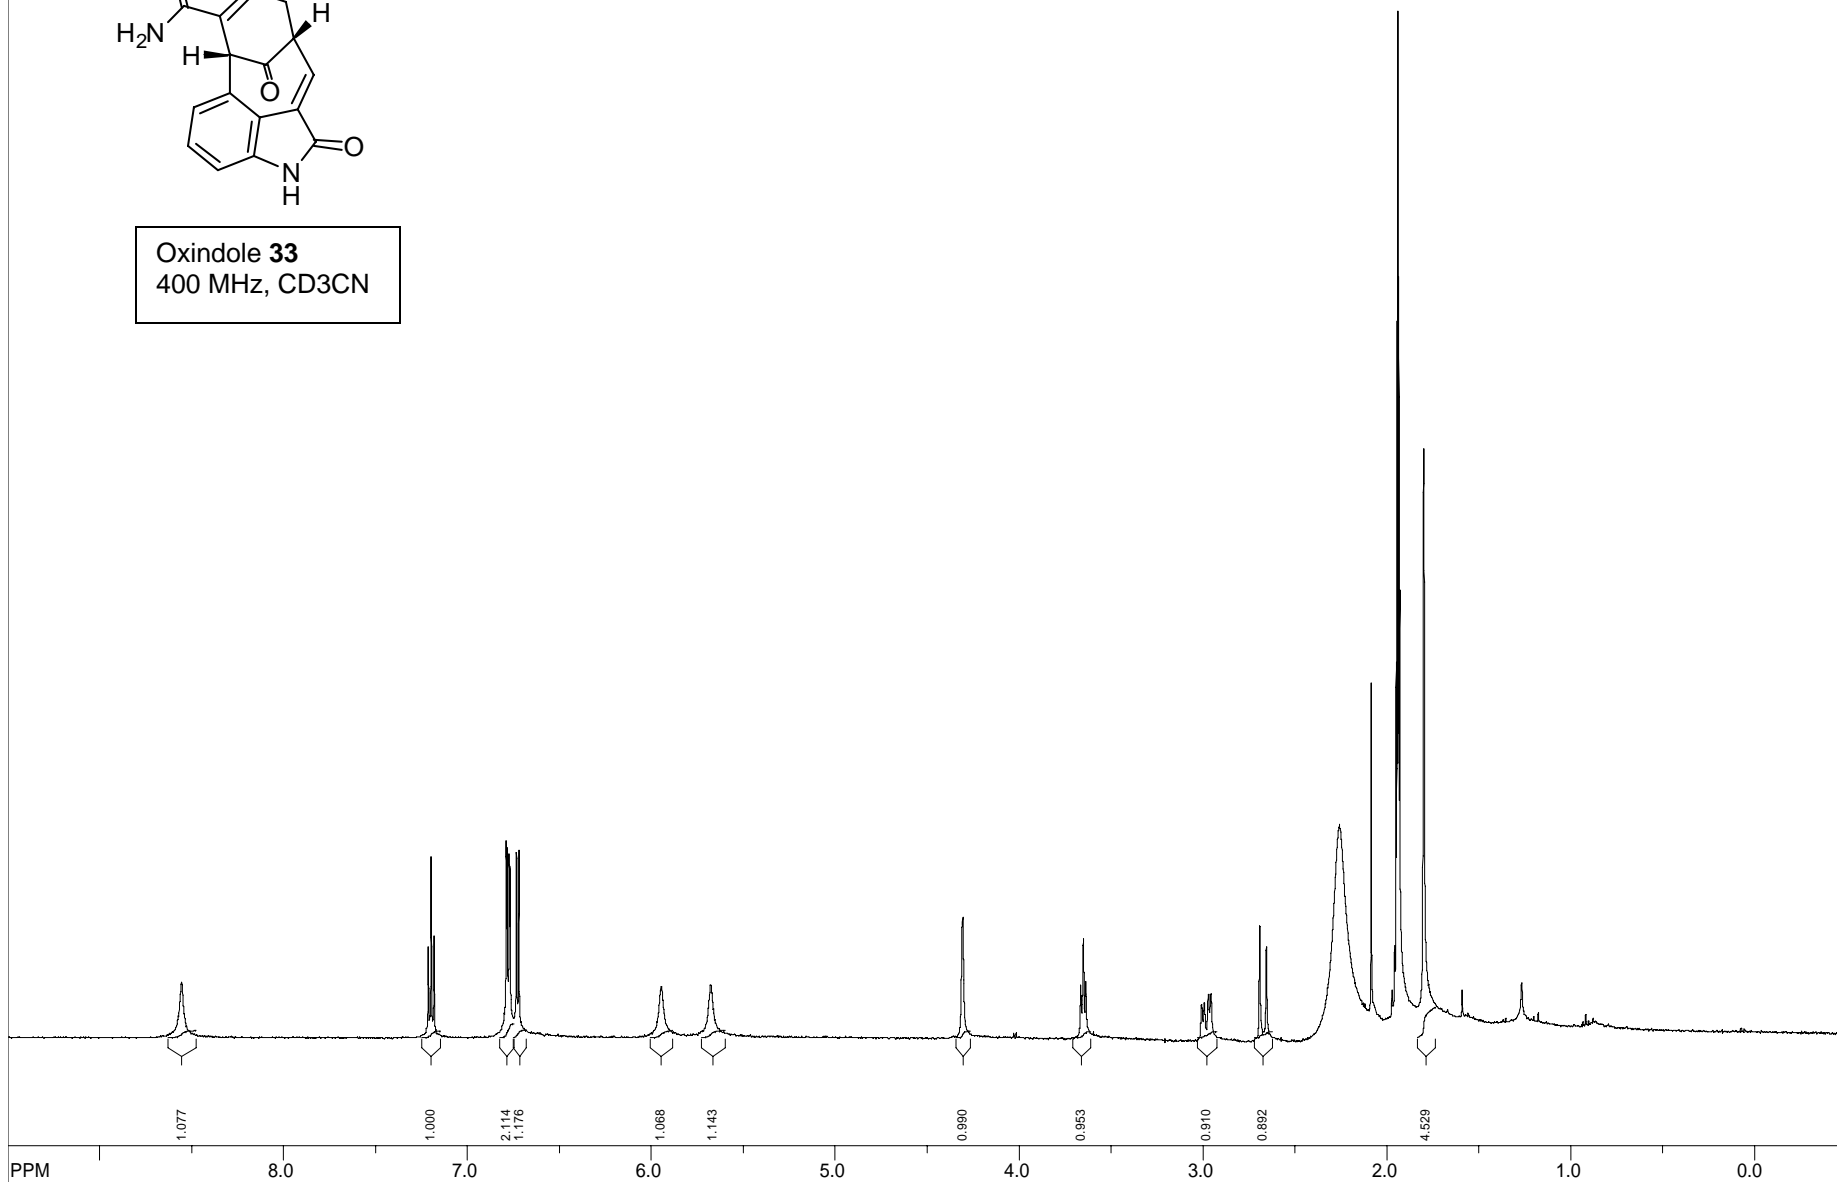

file: C:\Documents and Settings\Patrick\My Documents\PostDoc Chem\NMR data\Book 9\JM9-034CD3CN.fid\fid block# 1 exp: "s2pul"  
transmitter freq.: 499.753703 MHz  
time domain size: 64000 points  
width: 8000.00 Hz = 16.007885 ppm = 0.125000 Hz/pt  
number of scans: 60

freq. of 0 ppm: 499.751229 MHz  
processed size: 131072 complex points  
LB: 0.000 GB: 0.0000

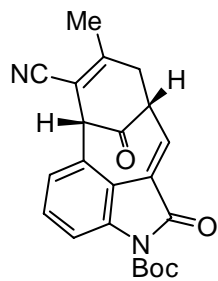

**N-Boc Oxindole, 34**  
500 MHz, CDCl<sub>3</sub>

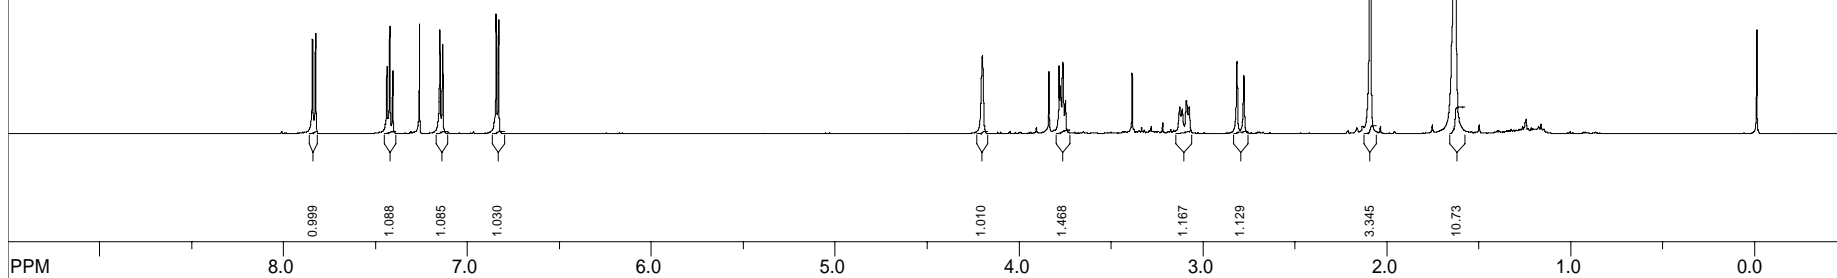

file: C:\Documents and Settings\Patrick\My Documents\PostDoc Chem\NMR data\Book 10\PJM10-034col.fid\fid\_block# 1 expt: "s2pul"  
transmitter freq.: 499.751060 MHz  
time domain size: 64000 points  
width: 8000.00 Hz = 16.007970 ppm = 0.125000 Hz/pt  
number of scans: 8

freq. of 0 ppm: 499.748574 MHz  
processed size: 131072 complex points  
LB: 0.000 GB: 0.0000

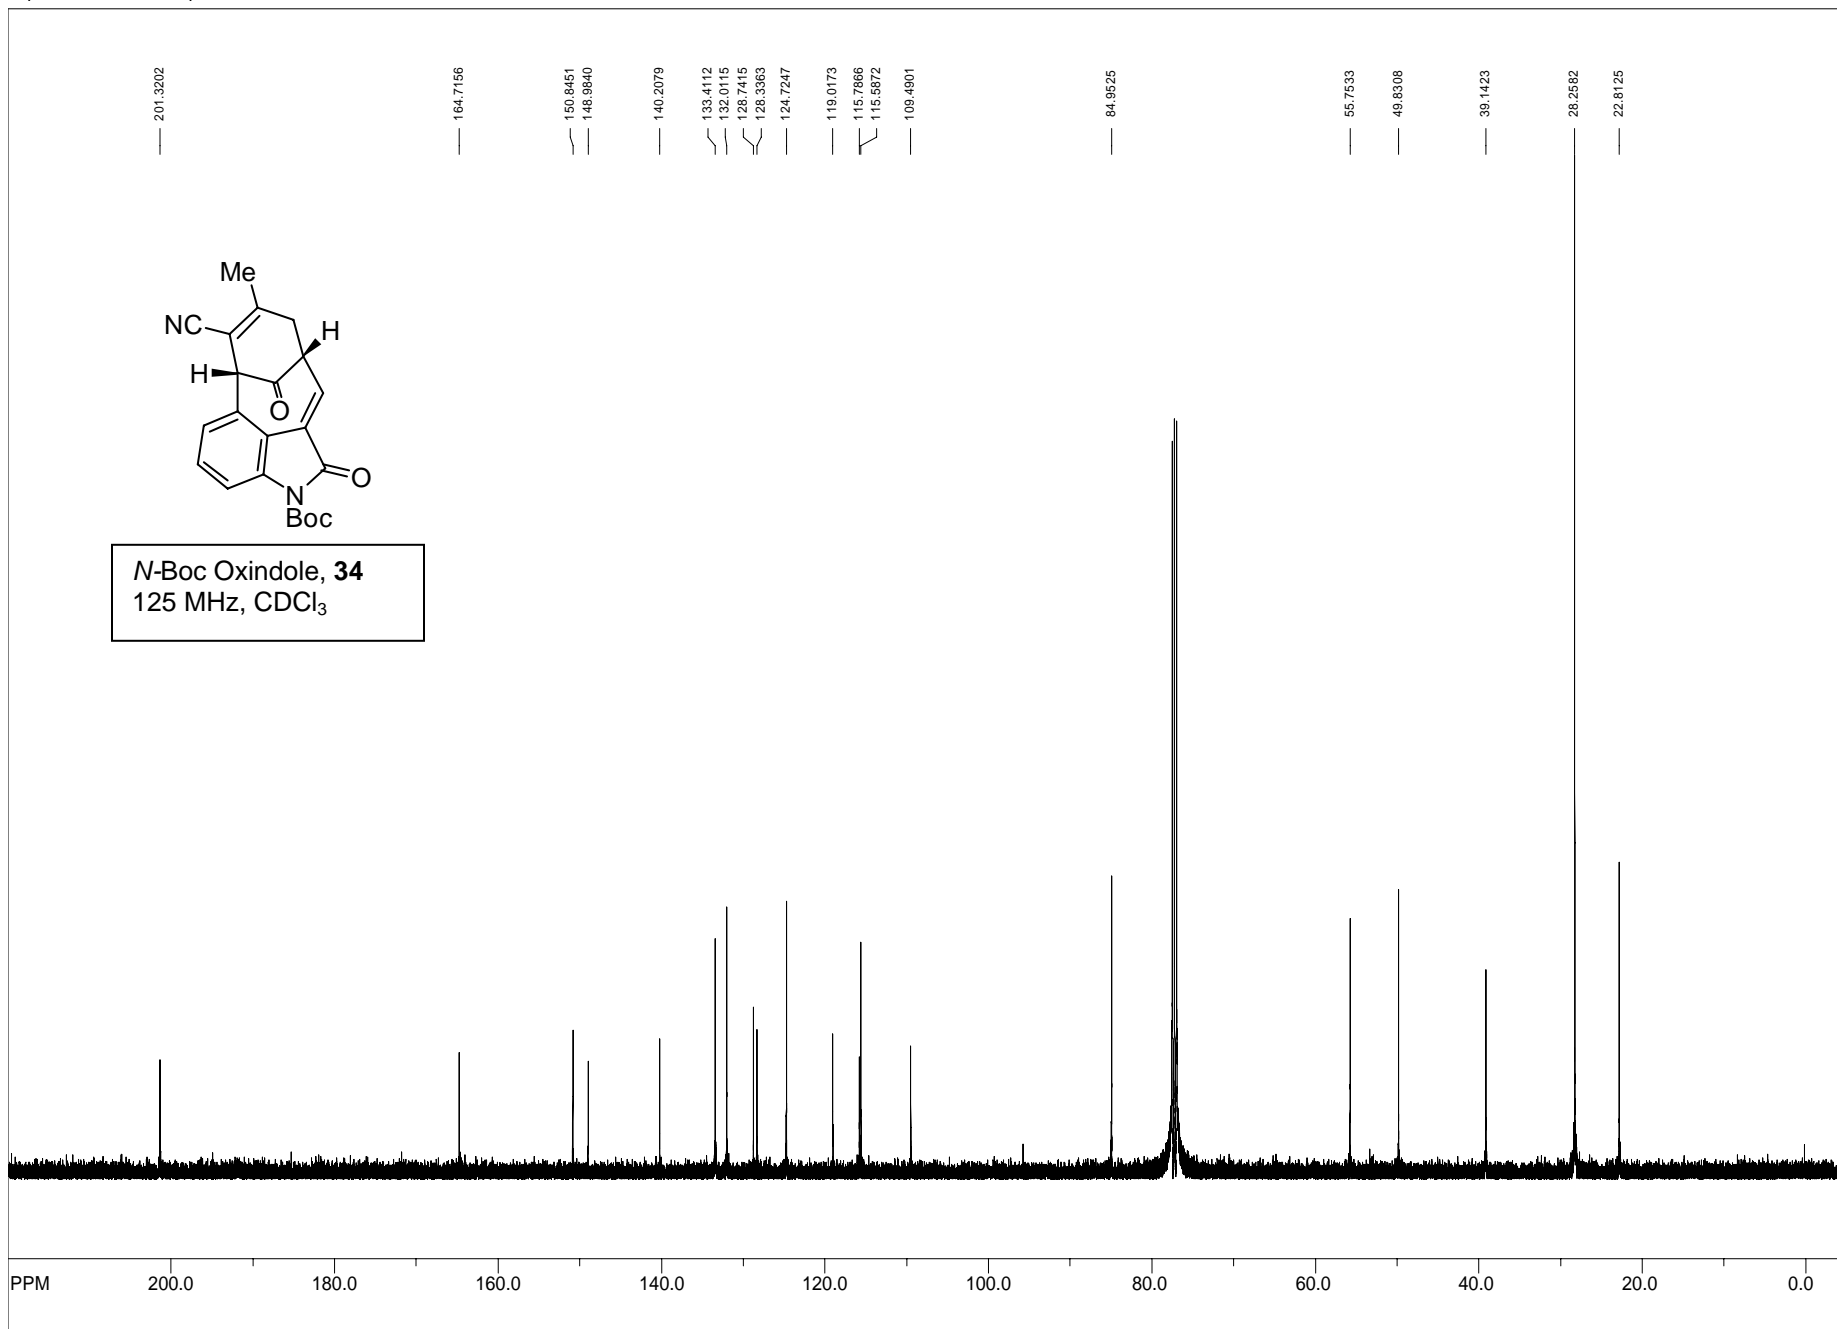

file: C:\Documents and Settings\Patrick\My Documents\PostDoc Chem\NMR data\Book 10\PJM10-034-C13.fid\fid block# 1 exp: "s2pul"  
transmitter freq.: 125.673885 MHz  
time domain size: 99016 points  
width: 33003.30 Hz = 262.610648 ppm = 0.333313 Hz/pt  
number of scans: 308

freq. of 0 ppm: 125.661855 MHz  
processed size: 131072 complex points  
LB: 0.000 GB: 0.0000

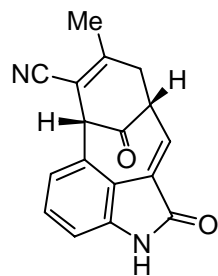

*N*-H Oxindole **35**  
500 MHz, CDCl<sub>3</sub>

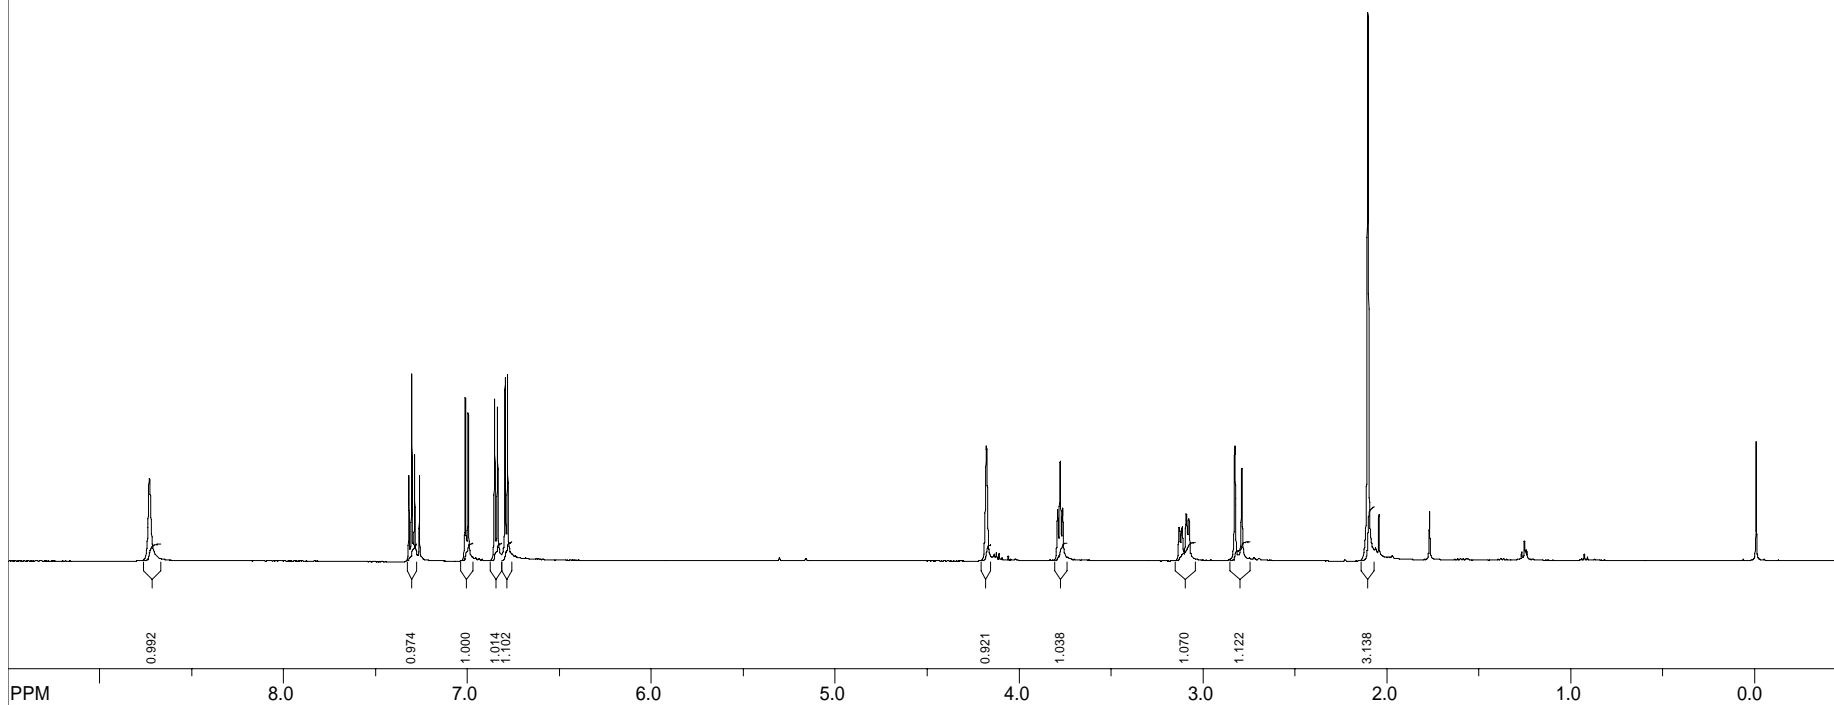

file: C:\Documents and Settings\Patrick\My Documents\PostDoc Chem\NMR data\Book 10\PJM10-053anal.fid\fid block# 1 exp: \*s2pu\*  
transmitter freq.: 499.751060 MHz  
time domain size: 64000 points  
width: 8000.00 Hz = 16.007970 ppm = 0.125000 Hz/pt  
number of scans: 16

freq. of 0 ppm: 499.748574 MHz  
processed size: 131072 complex points  
LB: 0.000 GB: 0.0000

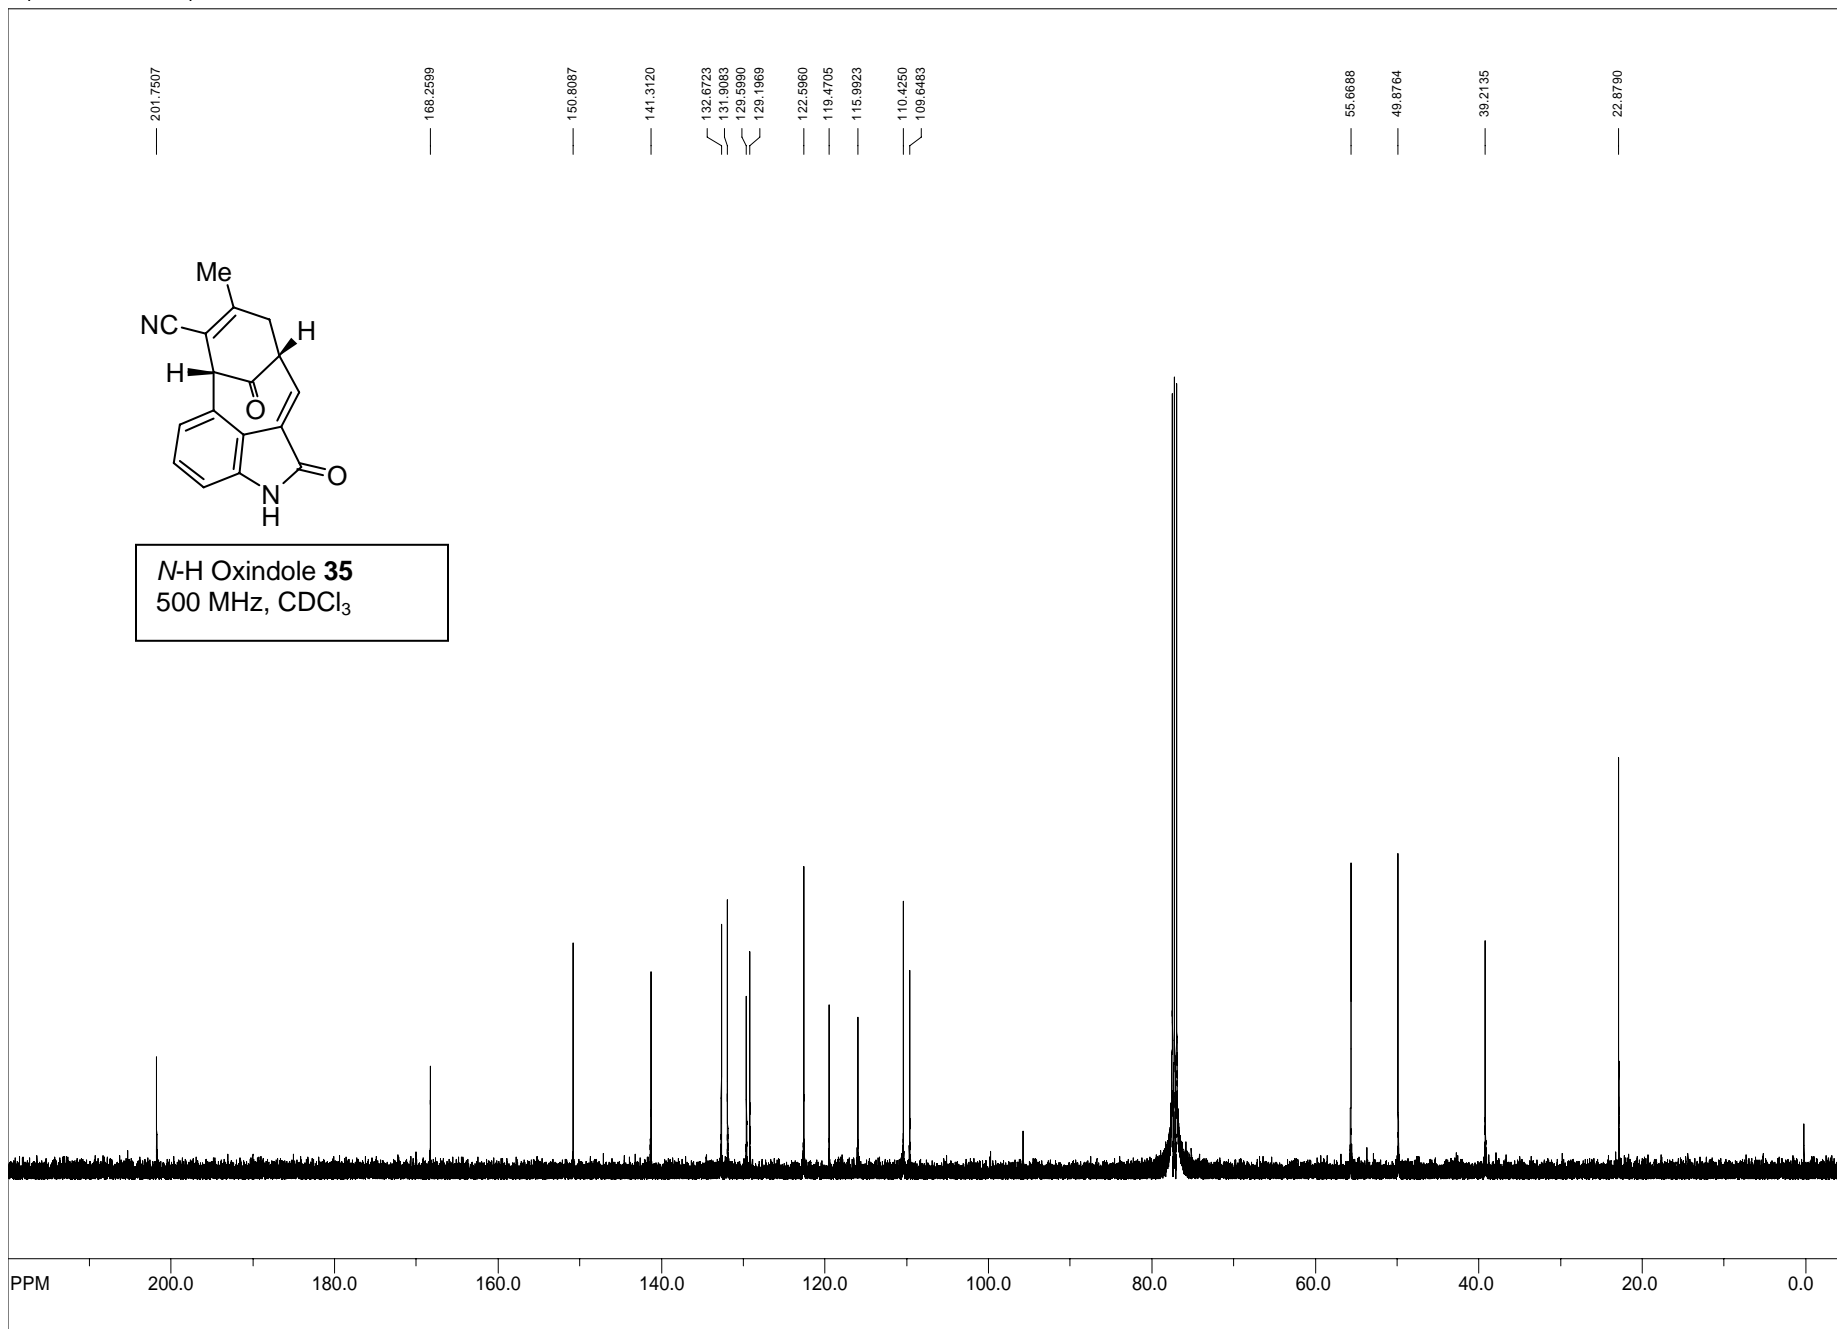

file: C:\Documents and Settings\Patrick\My Documents\PostDoc Chem\NMR data\Book 10\PJM10-040-C13.fid\fid block# 1 exp: "s2pul"  
transmitter freq.: 125.673885 MHz  
time domain size: 99016 points  
width: 33003.30 Hz = 262.610648 ppm = 0.333313 Hz/pt  
number of scans: 604

freq. of 0 ppm: 125.661853 MHz  
processed size: 131072 complex points  
LB: 0.000 GB: 0.0000
